# Supplementary material for: The structure of the tetraploid sour cherry ‘Schattenmorelle’ (Prunus cerasus L.) genome reveals insights into its segmental allopolyploid nature
Source: PubMed Central journal article supplement (PMC10722297; doi:10.3389/fpls.2023.1284478), 2023-12-01

## **The structure of the tetraploid sour cherry 'Schattenmorelle' (*Prunus cerasus* L.) genome reveals insights into its segmental allopolyploid nature**

Thomas W. Wöhner<sup>1</sup>, Ofere F. Emeriewen<sup>1</sup>, Alexander H.J. Wittenberg<sup>2</sup>, Koen Nijbroek<sup>2</sup>, Rui Peng Wang<sup>2</sup>, Evert-Jan Blom<sup>2</sup>, Jens Keilwagen<sup>4</sup>, Thomas Berner<sup>4</sup>, Katharina J. Hoff<sup>3</sup>, Lars Gabriel<sup>3</sup>, Hannah Thierfeldt<sup>3</sup>, Omar Almolla<sup>5</sup>, Lorenzo Barchi<sup>5</sup>, Mirko Schuster<sup>1</sup>, Janne Lempe<sup>1</sup>, Andreas Peil<sup>1</sup>, Henryk Flachowsky<sup>1</sup>

<sup>1</sup>Julius Kühn Institute (JKI) – Federal Research Centre for Cultivated Plants, Institute for Breeding Research on Fruit Crops, Pillnitzer Platz 3a, D-01326, Dresden, Germany

<sup>2</sup>Keygene N.V., P.O. Box 216, 6700 AE Wageningen, Netherlands

<sup>3</sup>Institute of Mathematics and Computer Science, University of Greifswald, Walther-Rathenau-Str. 47, 17489 Greifswald, Germany

<sup>4</sup>Julius Kühn Institute (JKI) – Federal Research Centre for Cultivated Plants, Institute for Biosafety in Plant Biotechnology, Erwin-Baur-Str. 27, D-06484 Quedlinburg, Germany

<sup>5</sup>DISAFA – Plant genetics, University of Turin, Grugliasco (TO), 10095 Italy

\*corresponding author: [thomas.woehner@julius-kuehn.de](mailto:thomas.woehner@julius-kuehn.de)

### **Keywords:**

genome assembly, *P. cerasus*, sour cherry, tetraploid

**This file contains information about supplemental material and methods**

## 1. Supplemental material and methods

### 1.1 Plant Material and RNA extraction, sequencing and iso-seq analysis

*Prunus cerasus* L. 'Schattenmorelle' (accession KIZC99-2) young leaf material (tetraploid, small tree, size ca. 1,5 m, BioProject accession PRJNA742509) was collected from single grafted trees grown in the experimental field of the Julius Kühn Institute (JKI) – Federal Research Centre for Cultivated Plants, Institute for Breeding Research on Fruit Crops, Dresden, Germany (Figure 1, coordinates 50.996389 N 13.885465 E).

Two pools were generated for RNA extraction (pool 1: mature leaves, premature leaves, flower buds, vegetative buds and pool 2: open flower after pollination, green fruits, fruits in color change from green to red).

### 1.2 De novo assembly and scaffolding

To provide compatibility with Phase Genomics Hi-C scaffolding pipeline, separation of the ancestral genomes was performed by mapping publicly available *Prunus avium* reads (DRA004760, DRA004761, DRA004762, DRA004763, DRA004764, DRA004765, DRA004768, DRA004769, DRA004770, DRA004771, DRA004772) to the preliminary assembly with BWA-Mem (Li and Durbin 2009, Li and Durbin 2010). A combination of external python packages (scipy linregress, scipy find\_peaks) were used to select contigs that fit the hypothesis of 1 or more clear coverage peaks on all *Prunus avium* derived contigs. The remaining contigs were then assigned to *Prunus fruticosa*. To test whether the separation was successful, the two subgenomes *Pces\_a* and *Pces\_f* were purged using the purge\_dups (V1.0.1).

### 1.3 Correctness, completeness and contiguity of the *Prunus cerasus* genome sequence

K-mer analysis was performed due to the following steps: adapter sequences of both short-read sequence data sets (125 bp and 150bp paired end) were trimmed with Trimmomatic software (Bolger et al. 2014) and the trimmed data were used to estimate the best k-mer size using the genomic k-mer counting software Meryl (Galaxy Version 1.3+galaxy2, Rhie 2020): count the occurrence of canonical k-mers | estimate the best k-mer size | 300 Mb | 0.001. A database file was processed for each data set. Using the union-sum function, the resulting database files were merged.

### 1.4 Structural and functional annotation

#### 1.4.1 Data preparation

Repeat masking for structural genome annotation was performed with RepeatModeler2 using the following dependency software versions: rmbblast 2.11.0+, TRF 4.09 (Benson, 1999), RECON (Bao and Eddy, 2002), RepeatScout 1.0.6, RepeatMasker 4.1.2, LTR Structural Analysis: Enabled (GenomeTools 1.6.2 (Gremme et al., 2013), LTR\_Retriever (Ou and Jiang, 2018) v2.9.0, Ninja (Wheeler, 2009) 0.95-cluster\_only, MAFFT (Katoh and Standley, 2013) 7.487, CD-HIT (Fu et al, 2012) 4.8.1).

#### 1.4.2 Long read integration

A primary gene set (transcriptome.gff) was generated with Cupcake.

Coverage information of PacBio transcripts is by default stored in the header of the transcript FASTA file. Genome annotation pipelines have not yet been adapted to use the information this way, but they require coverage information for adequate data incorporation. Therefore, we created coverage-equivalent redundant copies of transcripts with a coverage > 1 using a custom script `explode_pacbio_ccs.pl` (available at [https://github.com/Gaius-Augustus/BRAKER/blob/long\\_reads/scripts/explode\\_pacbio\\_ccs.pl](https://github.com/Gaius-Augustus/BRAKER/blob/long_reads/scripts/explode_pacbio_ccs.pl)) as follows:

```
cat longreads.fastq | ./explode_pacbio_ccs.pl > exploded.fq
```

This file was spliced-aligned to the genome using Minimap2 version 2.17-r941 (Li, 2018). The resulting SAM file was converted to BAM format using SAMtools (Li et al., 2009). The resulting BAM file was provided to BRAKER1 (Hoff et al., 2016; Hoff et al., 2019) as input.

In addition, the Cupcake transcripts were processed as follows: The script `stringtie2fa.py` (available at <https://github.com/Gaius-Augustus/Augustus/blob/master/scripts/stringtie2fa.py>) was used to convert the Cupcake GTF-file into transcripts with the following command line:

```
stringtie2fa.py -g genome.chr.fa.masked -f transcriptome.chr.gff ¥ -o cupcake.fa
```

GeneMarkS-T version 5.1 March 2014 was executed to find CDS in transcript fasta file as follows:

```
gmst.pl --strand direct cupcake.fa.mrna --output gmst.out ¥  
--format GFF
```

The local CDS coordinates were projected to the genome with another custom script (available at [https://github.com/Gaius-Augustus/BRAKER/blob/long\\_reads/scripts/gmst2globalCoords.py](https://github.com/Gaius-Augustus/BRAKER/blob/long_reads/scripts/gmst2globalCoords.py)):

```
gmst2globalCoords.py -t transcriptome.chr.gff -p gmst.out ¥  
-o gmst.global.gtf -g genome.chr.fa.masked
```

The global coordinate GTF-File was converted to Hints for Augustus with another custom script contained in folder `scripts` (available at <https://github.com/Gaius->

[Augustus/BRAKER/blob/long\\_reads/scripts/gmst\\_global2hints.pl](https://github.com/Gaius-Augustus/AUGUSTUS/blob/master/scripts/gmst_global2hints.pl)), the source key is M, i.e. the prediction of these hints will be enforced in AUGUSTUS:

```
gmst_global2hints.pl gmst.global.gtf > pacbio.hints
```

#### 1.4.3. Combination of BRAKER gene sets with TSEBRA

BRAKER1, BRAKER2, and long read gene sets were combined with a modified version of the TSEBRA combiner tool (modified version available at [https://github.com/Gaius-Augustus/TSEBRA/tree/long\\_reads](https://github.com/Gaius-Augustus/TSEBRA/tree/long_reads)) using a custom configuration file:

```
tsebra.py -g braker1/augustus.hints.gtf,braker2/augustus.hints.gtf ¥ -e  
braker1/hintsfile.gff,braker2/hintsfile.gff ¥  
-l gmst.global.gtf -c long_reads.cfg -o tsebra.gtf
```

Content of the custom TSEBRA configuration file (long\_reads.cfg):

```
# Weight for each hint source  
# Values have to be >= 0  
P 31  
E 0.150  
C 15  
M 100.5  
L 0.5  
# Required fraction of supported introns or supported start/stop-codons for a transcript  
# Values have to be in [0, 1]  
intron_support 10.8  
stopstasto_support 1  
start_support 2  
# Allowed difference for each feature  
# Values have to be in [0, 1]  
e_1 0.1  
e_2 0.51  
e_3 1  
# Values have to be >0  
e_34 25300  
e_54 1050
```

#### 1.4.4. Gene structure prediction using GeMoMa

Homology-based gene annotation was performed with GeMoMa version 1.9 (Keilwagen et al. 2019) using the mapped RNA-seq data from *P. cerasus* cv ‘Schattenmorelle’ and the genome and gene annotation from the following reference organisms that are available at NCBI: *Arabidopsis thaliana* (TAIR10.1, RefSeq GCF\_000001735.4), *Vitis vinifera* (12x, RefSeq GCF\_000003745.3), *Populus trichocarpa* (Pop\_tri\_v3, GCF\_000002775.4).

Other references were downloaded from the GDR database ([www. https://www.rosaceae.org](http://www.rosaceae.org)): *M. domestica* (*Malus x domestica* HFTH1 Whole Genome v1.0), *F. vesca* (*Fragaria vesca* Whole Genome v4.0.a1), *P. avium* (*Prunus avium* Tieton Genome v2.0), *P. persica* (*Prunus persica* Whole Genome Assembly v2.0, v2.0.a1), *P. dulcis* (*Prunus dulcis* Lauranne Genome v1.0) and *P. armeniaca* (*Prunus armeniaca* Marouch n14 Whole Genome v1.0), *P. yedonensis* (*Prunus yedoensis* var. *nudiflora* Genome v1.0), *P. domestica* (*Prunus domestica* Draft Genome Assembly v1.0), *P. communis* (*Pyrus communis* Bartlett DH Genome v2.0), *R. occidentalis* (*Rubus occidentalis* Whole Genome v3.0). *P. fruticosa* was downloaded from OpenAgrar (Wöhner et al. 2021 b).

#### 1.4.5 Final gene structure generation

BUSCO version 5.2.2 with set embryophyta\_odb10 (number of genomes: 50, number of BUSCOs: 1614) was used for the assessment of protein completeness. For handling alternative transcripts correctly and not as duplicates, a custom script was ran on the BUSCO full table, assigning gene ID instead of transcript ID.

The chloroplast and mitochondria sequences were annotated with GeSeq (Tillich et al. 2017) using the all available references for chloroplast (*P. armeniaca*, *P. avium*, *P. campanulata*, *P. cerasoides*, *P. davidiana*, *P. dictyoneura*, *P. domestica*, *P. dulcis*, *P. humilis*, *P. kansuensis*, *P. matuurae*, *P. maximowiczii*, *P. mira*, *P. mongolica*, *P. mume*, *P. pendunculata*, *P. persica*, *P. pseudocerasus*, *P. rufa*, *P. salicina*, *P. serotina*, *P. speciosa*, *P. takesimensis*, *P. tenella*, *P. tomentosa*, *P. triloba*, *P. yedonensis*, *P. zippeliana*) from NCBI and mitochondria from *P. avium* (GenBank accession MK816392) published by Yan et al. (2019). GeSeq pipeline analysis was performed using the annotation packages ARAGORN, blatN, blatX, Chloé and HMMER.

#### 1.4.6 Protein clustering, multiple sequence alignment and divergence of time estimation

The Proteinortho (Galaxy Version 6.0.32+galaxy0) was used to find orthologous proteins within the datasets with the following parameters: LAST, e-value threshold = 0.001, minimal algebraic connectivity = 0.1, in add. options: Minimal coverage of best alignment in % = 50, min. seq. similarity in % = 95, minimal percent identity of best blast hits in % = 25.

MAFFT (Galaxy Version 7.505+galaxy0, Katoh and Standley 2013) was used to align each obtained orthogroup with the following parameters: gap extent 0.123, gap open 1.53, no matrix, output fasta.

A timetree was inferred by applying the RelTime method (Tamura et al. 2012, Tamura et al. 2018) to the user-supplied phylogenetic tree whose branch lengths were calculated using the Ordinary Least Squares method. The timetree was computed using 1 calibration constraint. The Tao et al. (2020) method was used to set minimum and maximum time boundaries on nodes for which calibration densities were provided. Confidence intervals were computed using the Tao et al. (2020) method. The evolutionary distances were computed using the JTT matrix-based method (Jones et al. 1992) and are in the units of the number of amino acid substitutions per site. The rate variation among sites was modelled with a gamma distribution (shape parameter = 1). This analysis involved nine amino acid sequences. There were 419,586 positions in the final dataset.

## References

- Kim, D., Paggi, J. M., Park, C., Bennett, C., & Salzberg, S. L. (2019). Graph-based genome alignment and genotyping with HISAT2 and HISAT-genotype. *Nature biotechnology*, 37(8), 907-915.
- Li, H., & Durbin, R. (2009). Fast and accurate short read alignment with Burrows-Wheeler transform. *Bioinformatics*, 25(14), 1754–1760. <https://doi.org/10.1093/bioinformatics/btp324>
- Li, H., & Durbin, R. (2010). Fast and accurate long-read alignment with Burrows–Wheeler transform. *Bioinformatics*, 26(5), 589–595. <https://doi.org/10.1093/bioinformatics/btp698>
- Benson, G. (1999). Tandem repeats finder: a program to analyze DNA sequences. *Nucleic acids research*, 27(2), 573-580
- Bao, Z., & Eddy, S. R. (2002). Automated de novo identification of repeat sequence families in sequenced genomes. *Genome research*, 12(8), 1269-1276.
- Gremme, G., Steinbiss, S., & Kurtz, S. (2013). GenomeTools: a comprehensive software library for efficient processing of structured genome annotations. *IEEE/ACM transactions on computational biology and bioinformatics*, 10(3), 645-656.
- Ou, S., & Jiang, N. (2018). LTR\_retriever: a highly accurate and sensitive program for identification of long terminal repeat retrotransposons. *Plant physiology*, 176(2), 1410-1422.
- Wheeler, T. J. (2009, September). Large-scale neighbor-joining with NINJA. In *International Workshop on Algorithms in Bioinformatics* (pp. 375-389). Springer, Berlin, Heidelberg.
- Katoh, K., & Standley, D. M. (2013). MAFFT multiple sequence alignment software version 7: improvements in performance and usability. *Molecular biology and evolution*, 30(4), 772-780.
- Fu, L., Niu, B., Zhu, Z., Wu, S., & Li, W. (2012). CD-HIT: accelerated for clustering the next-generation sequencing data. *Bioinformatics*, 28(23), 3150-3152.
- Li, H. (2018). Minimap2: pairwise alignment for nucleotide sequences. *Bioinformatics*, 34(18), 3094-3100.
- Li, H., Handsaker, B., Wysoker, A., Fennell, T., Ruan, J., Homer, N., ... & Durbin, R. (2009). The sequence alignment/map format and SAMtools. *Bioinformatics*, 25(16), 2078-2079.
- Hoff, K. J., Lange, S., Lomsadze, A., Borodovsky, M., & Stanke, M. (2016). BRAKER1: unsupervised RNA-Seq-based genome annotation with GeneMark-ET and AUGUSTUS. *Bioinformatics*, 32(5), 767-769.
- Hoff, K. J., Lomsadze, A., Borodovsky, M., & Stanke, M. (2019). Whole-genome annotation with BRAKER. In *Gene Prediction* (pp. 65-95). Humana, New York, NY
- J. Keilwagen, F. Hartung, J. Grau, GeMoMa: Homology-based gene prediction utilizing intron position conservation and RNA-seq data, in: *Gene Prediction*, Springer, 2019, pp. 161–177.

- M. Tillich, P. Lehwark, T. Pellizzer, E.S. Ulbricht-Jones, A. Fischer, R. Bock, S. Greiner, GeSeq—versatile and accurate annotation of organelle genomes, *Nucleic acids research* 45 (2017) W6-W11.
- M. Yan, X. Zhang, X. Zhao, Z. Yuan, The complete mitochondrial genome sequence of sweet cherry (*Prunus avium* cv. 'summit'), *Mitochondrial DNA Part B* 4 (2019) 1996–1997.
- Katoh, K., & Standley, D. M. (2013). MAFFT Multiple Sequence Alignment Software Version 7: Improvements in Performance and Usability. *Molecular Biology and Evolution*, 30(4), 772–780. <https://doi.org/10.1093/molbev/mst010>
- Tamura K., Battistuzzi FU, Billing-Ross P, Murillo O, Filipowski A, and Kumar S. (2012). Estimating Divergence Times in Large Molecular Phylogenies. *Proceedings of the National Academy of Sciences* 109:19333-19338.
- Tamura K., Qiqing T., and Kumar S. (2018). Theoretical Foundation of the RelTime Method for Estimating Divergence Times from Variable Evolutionary Rates. *Molecular Biology and Evolution* 35: 1770-1782.
- Tao Q., Tamura K., Mello B., and Kumar S. (2020) Reliable Confidence Intervals for RelTime Estimates of Evolutionary Divergence Times. *Molecular Biology and Evolution*, 37(1): 280-290
- Wöhner, T. W., Emeriewen, O. F., Wittenberg, A. H., Schneiders, H., Vrijenhoek, I., Halász, J., ... & Flachowsky, H. (2021a). The draft chromosome-level genome assembly of tetraploid ground cherry (*Prunus fruticosa* Pall.) from long reads. *Genomics*, 113(6), 4173-4183.
- T.W. Wöhner, O.F. Emeriewen, A.H.J. Wittenberg, H. Schneiders, I. Vrijenhoek, J. Halász, K. Hrotkó, K.J. Hoff, L. Gabriel, J. Keilwagen, T. Berner, M. Schuster, A. Peil, J. Wünsche, S. Kropop, H. Flachowsky (2021b). Supporting Materials for - The Draft Chromosome-level Genome Assembly of Tetraploid Ground Cherry (*Prunus fruticosa* Pall.) from Long Reads. [https://www.openagrar.de/receive/openagrar\\_mods\\_00070329](https://www.openagrar.de/receive/openagrar_mods_00070329) (2021) (accessed 1 June 2021)
- Jones D.T., Taylor W.R., and Thornton J.M. (1992). The rapid generation of mutation data matrices from protein sequences. *Computer Applications in the Biosciences* 8: 275-282.
- Bolger AM, Lohse M, Usadel B. Trimmomatic: a flexible trimmer for Illumina sequence data. *Bioinformatics* 2014;30(15):2114–20. <https://doi.org/10.1093/bioinformatics/btu170>.
- Arang Rhie (2020). Meryl. In GitHub repository. GitHub. <https://github.com/marbl/meryl>.



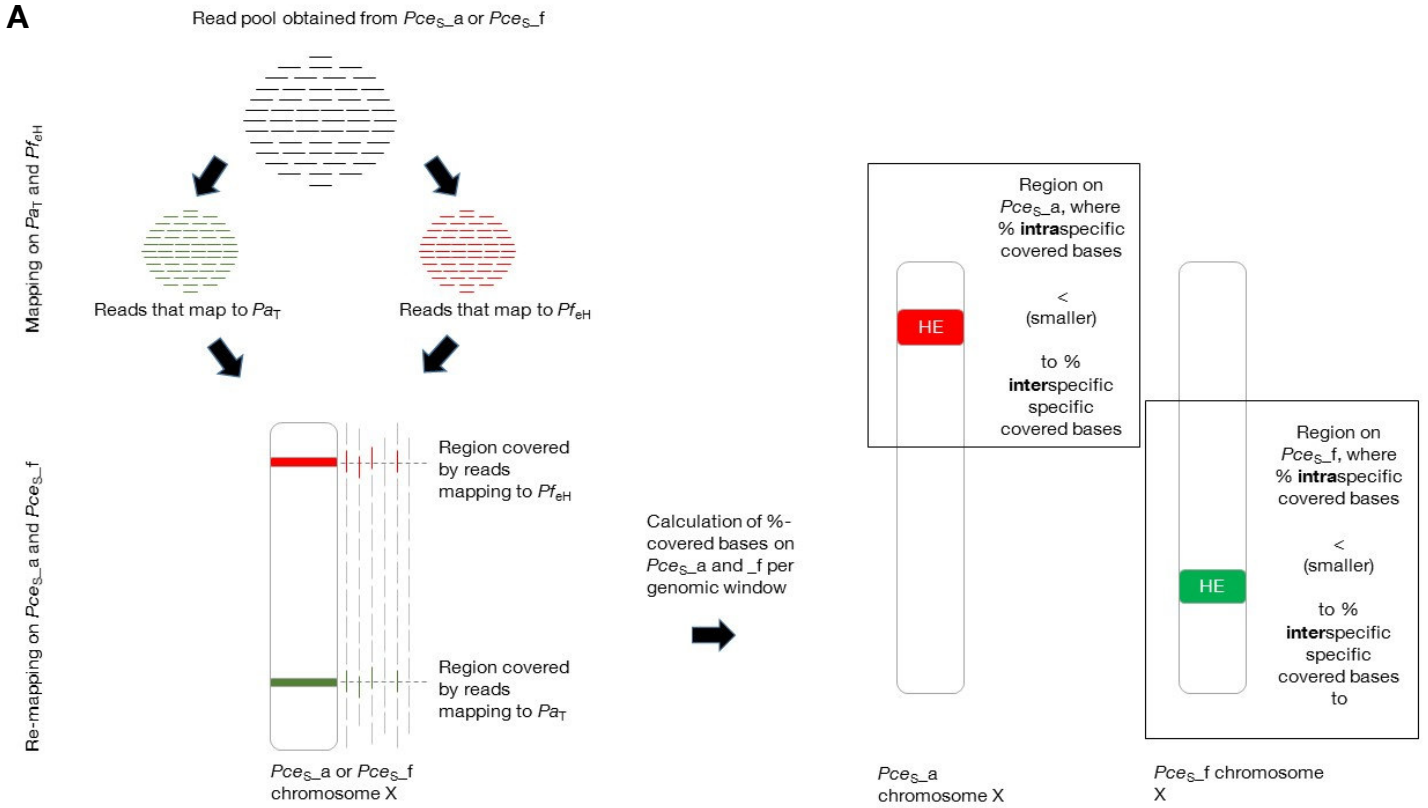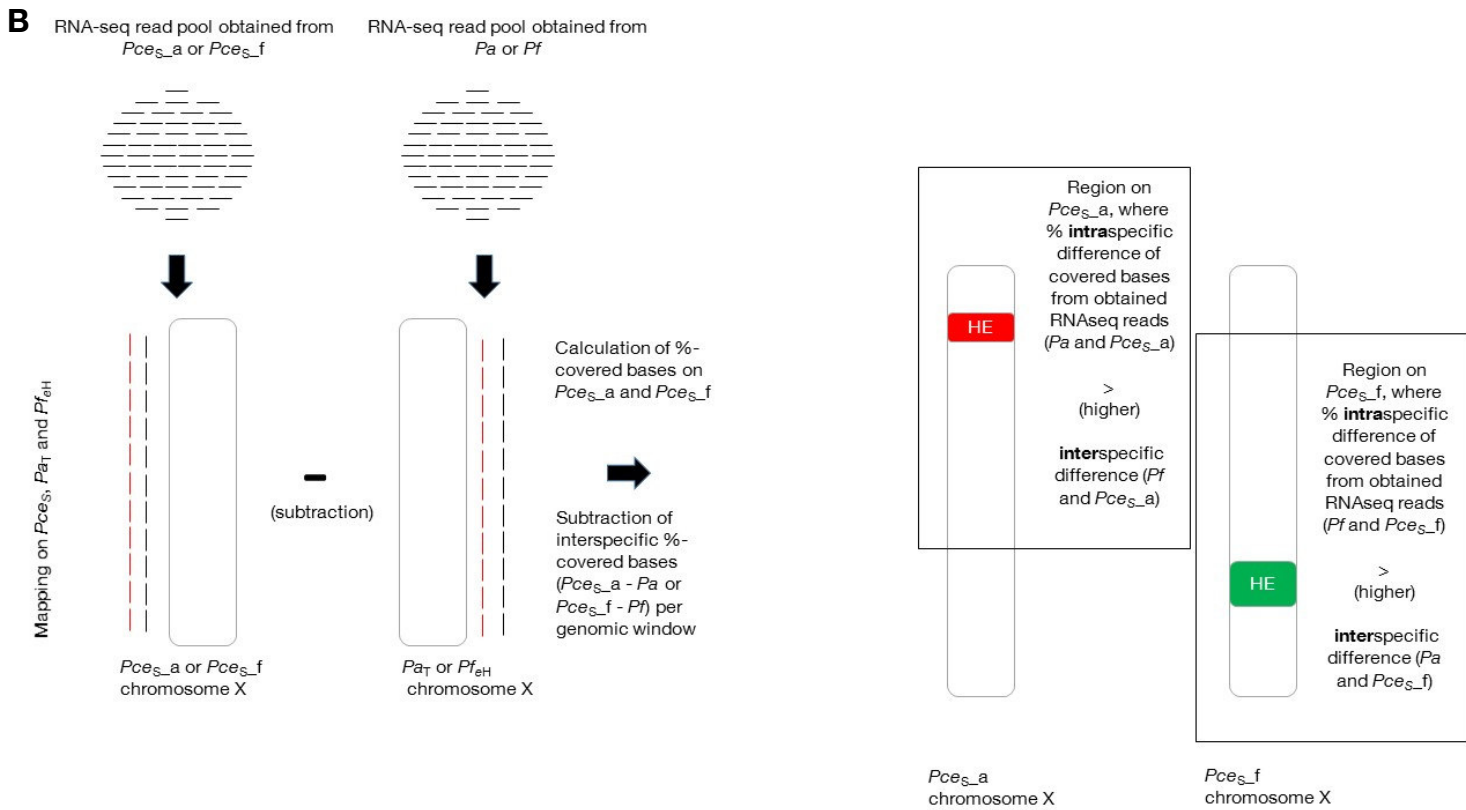

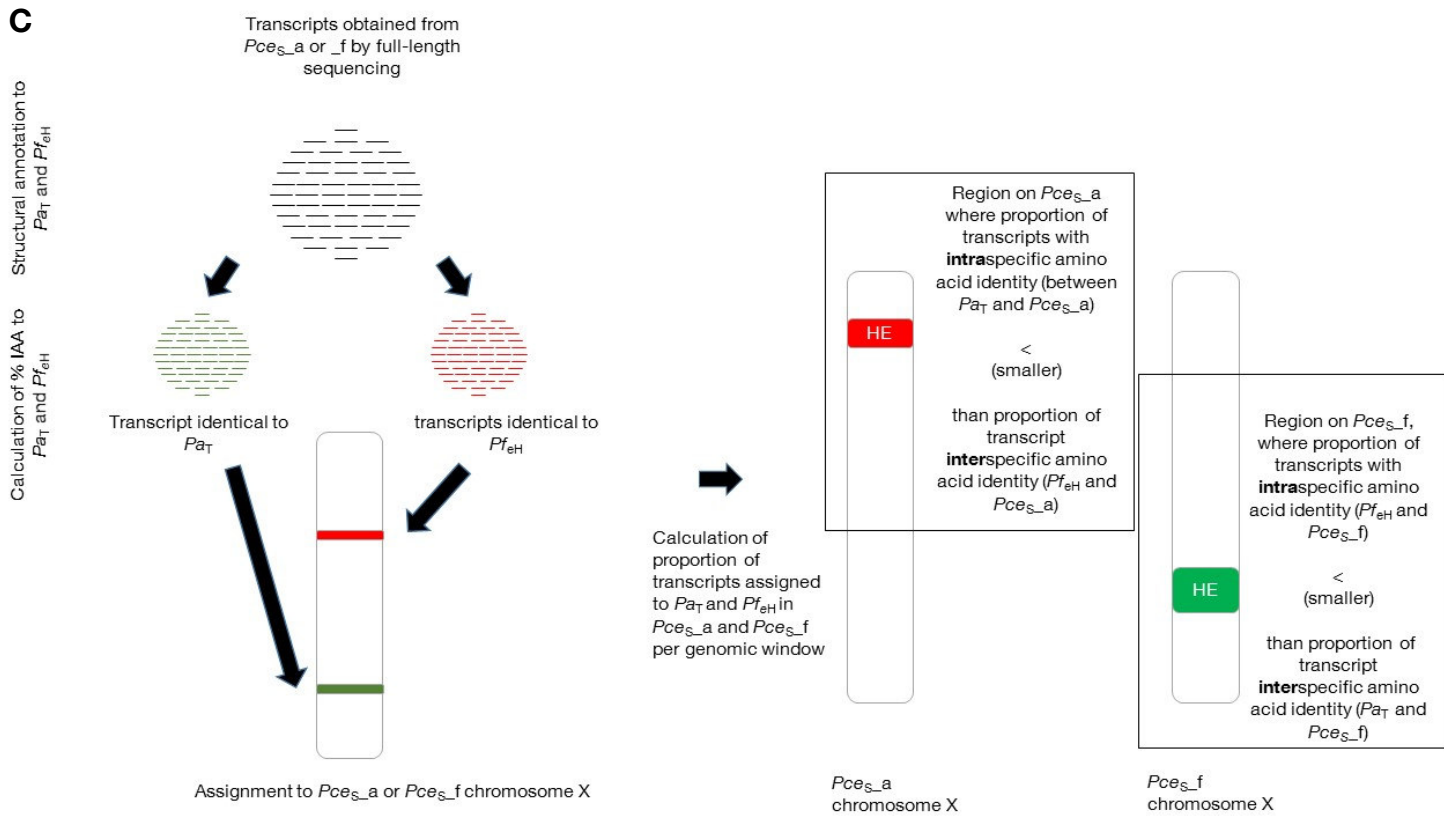

**Figure S1** Schematic summary of the 3 approaches to evaluate homologous exchanges (HE) in the *P. cerasus* L. genome sequence of 'Schattenmorelle' by (A) genomic reads: the intraspecific % of covered bases from mapped reads (*Pce<sub>S</sub>\_a* to *Pa<sub>T</sub>*, *Pce<sub>S</sub>\_f* to *Pf<sub>eH</sub>*) is smaller (<) than the interspecific % of covered bases from mapped reads (*Pce<sub>S</sub>\_a* to *Pf<sub>eH</sub>*, *Pce<sub>S</sub>\_f* to *Pa<sub>T</sub>*); (B) transcriptomic reads: Intraspecific difference of covered bases from obtained RNAseq reads (% covered bases from *Pa* reads subtracted (-) from % covered bases from *Pce<sub>S</sub>\_a*, and vice versa for *Pf* and *Pce<sub>S</sub>\_f*) is higher (>) than the interspecific difference of covered bases from obtained RNAseq reads (% covered bases from *Pf* subtracted from *Pce<sub>S</sub>\_a*, and vice versa for *Pa* and *Pce<sub>S</sub>\_f*); (C) Identity of amino acids (IAA): were proportion of transcripts with intraspecific amino acid identity (*Pa<sub>T</sub>* and *Pce<sub>S</sub>\_a*, *Pf<sub>eH</sub>* and *Pce<sub>S</sub>\_f*) smaller (<) than the proportion of transcripts with interspecific amino acid identity (*Pf<sub>eH</sub>* and *Pce<sub>S</sub>\_a*, *Pa<sub>T</sub>* and *Pce<sub>S</sub>\_f*).

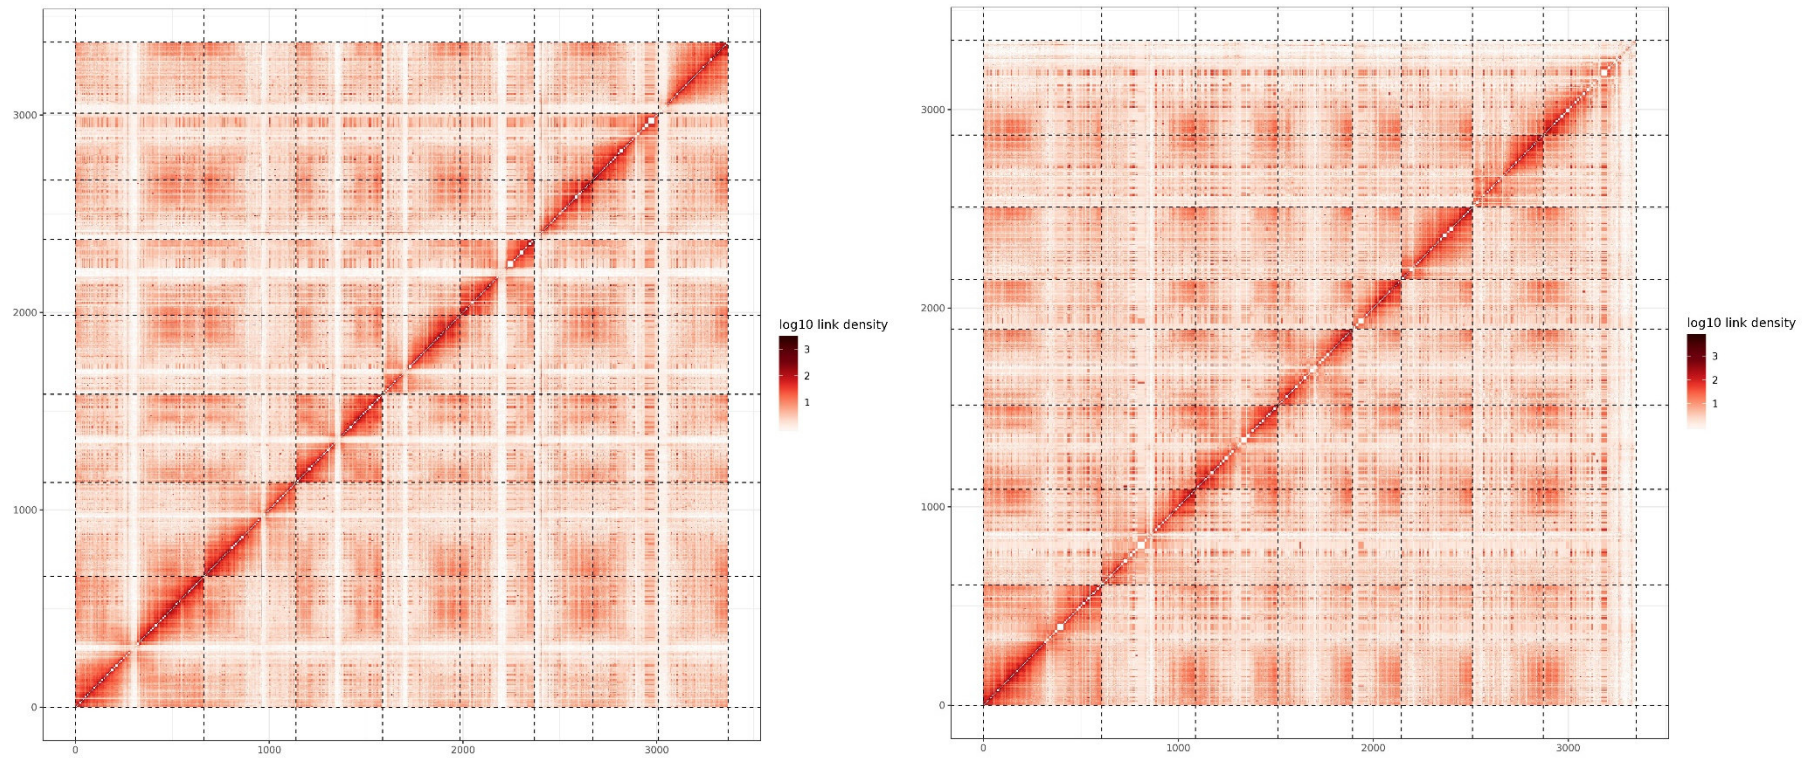

**Figure S2** Hi-C heatmap post-scaffolding for the subgenomes *Pces\_a* (left) and *Pces\_f* (right) of *P. cerasus* cv 'Schattenmorelle'. The heatmap indicates the density of paired Hi-C reads which interact to each other in close proximity. High intense colour indicates high interaction.

(A)

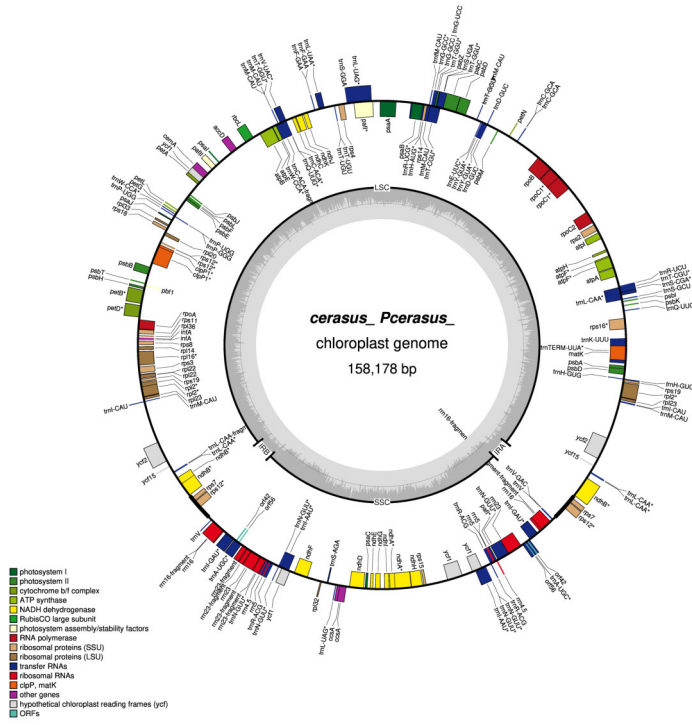

(B)

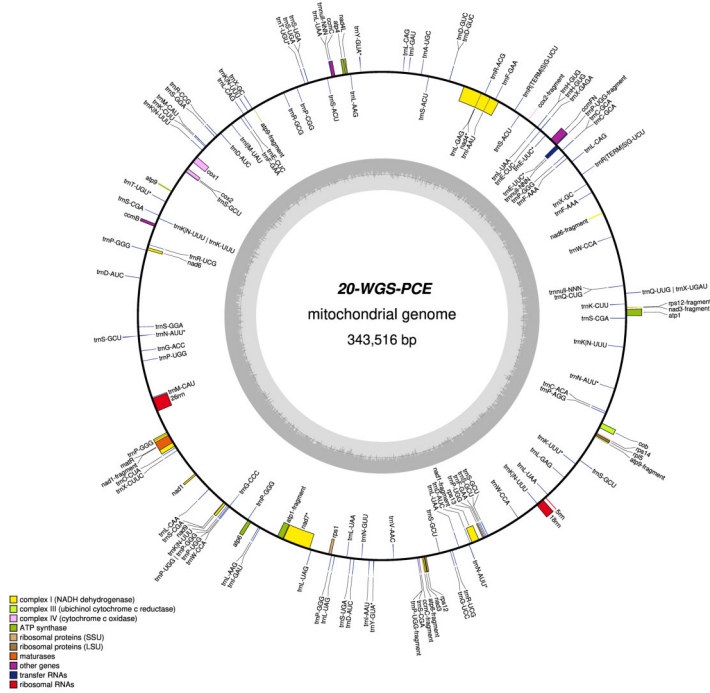

**Figure S3** The chloroplast (a) and mitochondrial (b) sequences of *P. cerasus* L. cv 'Schattenmorelle'.

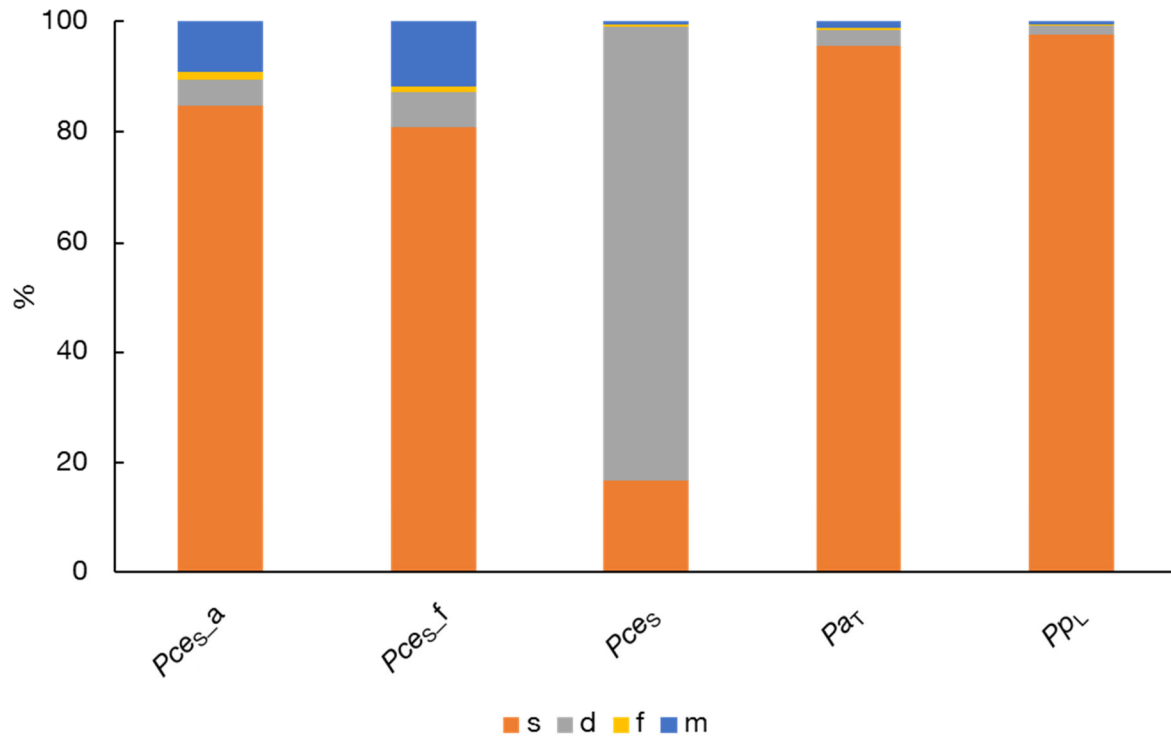

**Figure S4** Analysis of completeness of the *P. cerasus* cv. Schattenmorelle subgenomes *P. cerasus* cv 'Schattenmorelle' subgenome *avium* (*Pces\_a*) and *P. cerasus* cv 'Schattenmorelle' subgenome *fruticosa* (*Pces\_f*) and combined datasets compared to *P. avium* cv. 'Tieton' (*Pat*) and *P. persica* cv. Lovell (*Ppl*) by mapping of a set of universal single-copy orthologs using BUSCO. The bar charts indicate complete single copy (orange), complete duplicated (gray), fragmented (yellow) and missing (blue) genes. For evaluation the embryophyta\_odb10 BUSCO dataset (n=1614) was used. *P. cerasus* cv. Schattenmorelle show a 99 % completeness (S: 16.7 %, D: 82.3 %, F: 0.4 %, M: 0.6 %, n: 1614) which reaches the completeness of *P. avium* cv. 'Tieton' (C: 98.3 %, S: 95.6 %, D: 2.7 %, F: 0.5 %, M:1.5 %, n:1614) and *P. persica* 'Lovell' (C: 99.3 %, S: 97.5 %, D: 1.8%, F: 0.1 %, M: 0.6 %, n:1614).

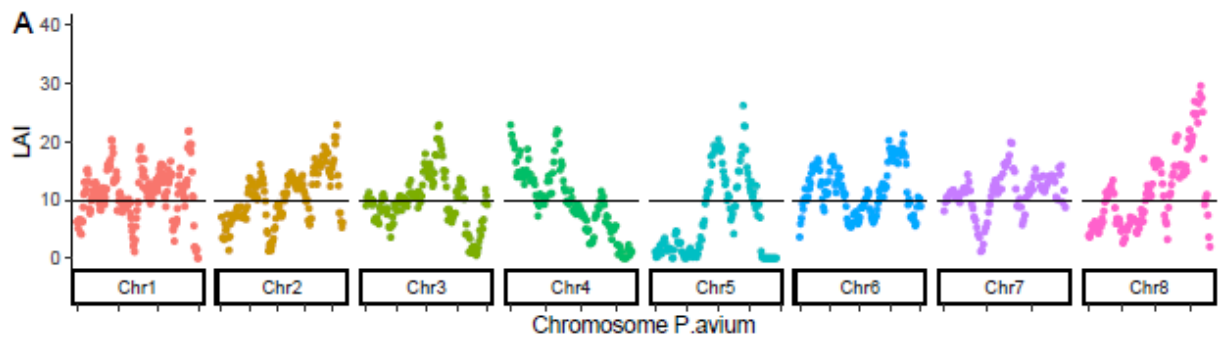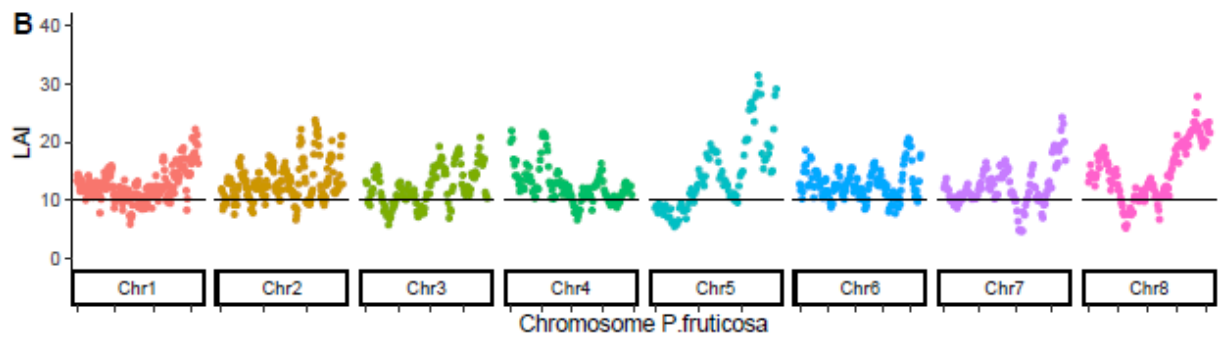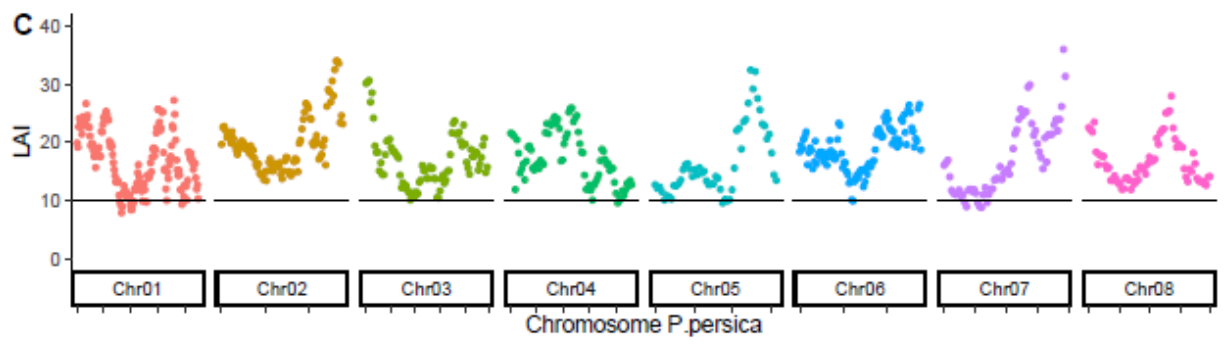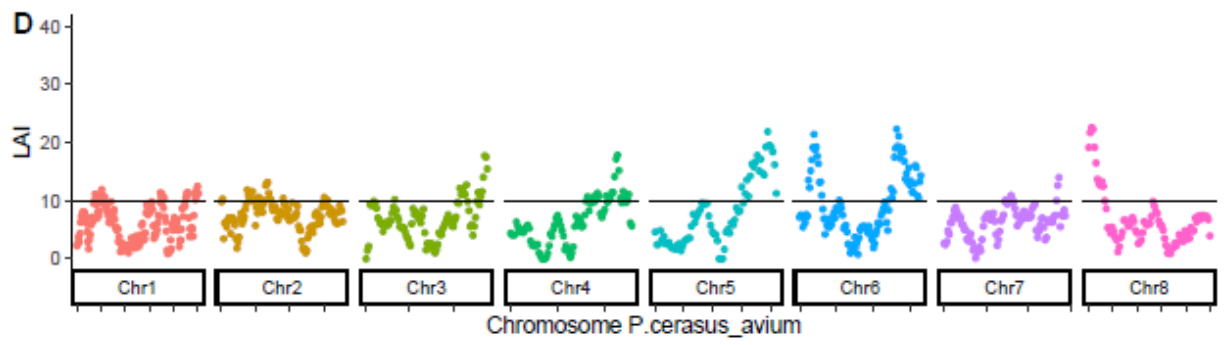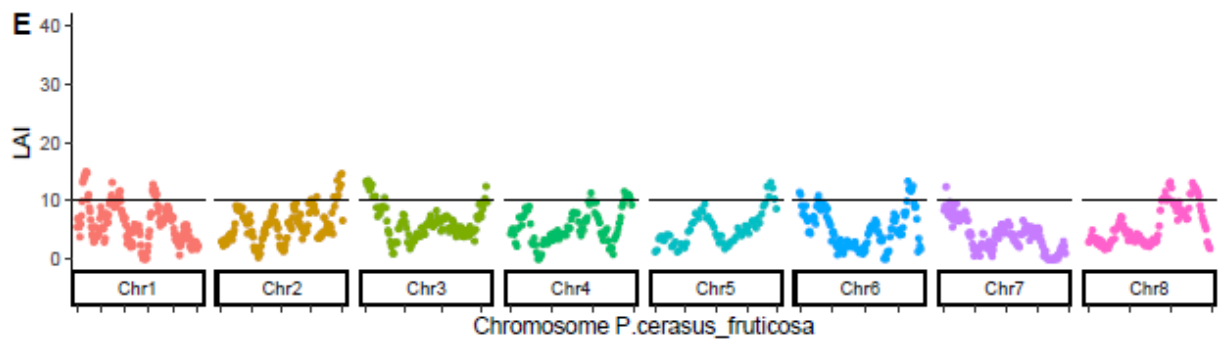

**Figure S5** Assessing the quality of repetitive sequences between the chromosome sequences of *P. avium* 'Tieton' (A), *P. fruticosa* ecotype Hármasatárhegy (B), *P. persica* 'Lovell', and (C) *P. cerasus* subgenome *avium* and *P. cerasus* subgenome *fruticosa* using the LAI index. The genomes *P. cerasus* [this study] and *P. avium* were sequenced with ONT 9.4.1 and Illumina (Wang wet al. 2020), *P. fruticosa* with ONT 10.3 (Wöhner et al. 2021) and *P. persica* with Illumina and Sanger sequencing of fosmid and BAC clones (Verde et al. 2017).

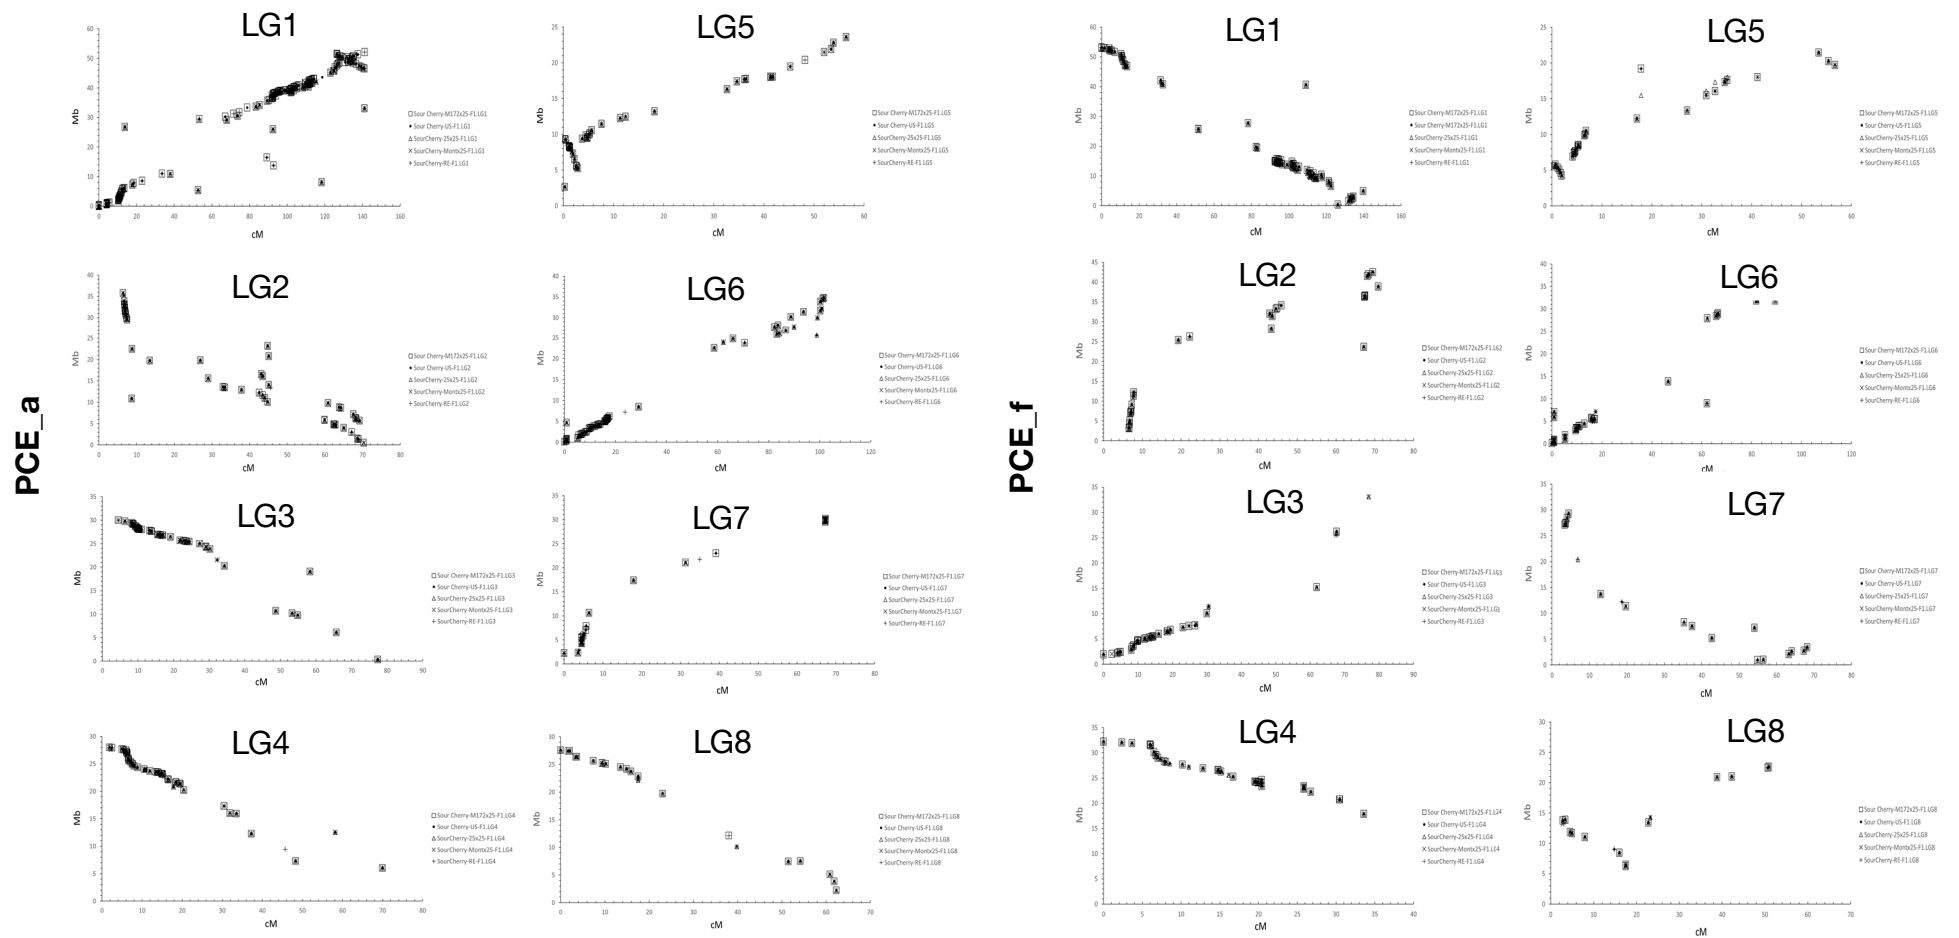

**Figure S6** Collinearity plots between the five published genetic maps of sour cherry (M172x25-F1, US-F1, 25x25-F1, Montx25-F1, RE-F1) and the *P. cerasus* cv 'Schattenmorelle' subgenome *avium* (*Pces\_a*) and *fruticosa* (*Pces\_f*). X-axis represents the genetic position of a marker in the genetic linkage map given in centi Morgan (cM). Y-axis represents the physical position of a marker sequence within the genome sequence of the respective subgenome given in Mega base pairs (Mbp).



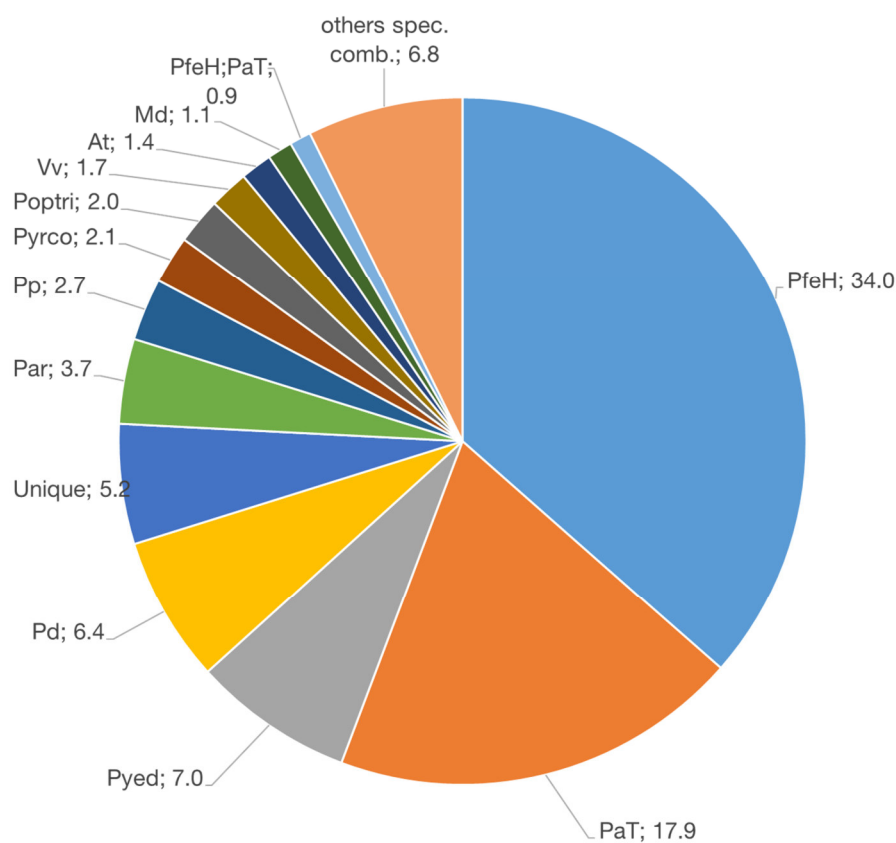

**Figure S7** Percentage of *P. cerasus* (*Pce*) proteins by IAA compared with 15 reference species. *P. fruticosa* ecotype Hármashatárhegy ( $P_{feH}$ ), *P. avium* 'Tieton' ( $Pa_T$ ), *P. yedonensis* (*Pyed*), *P. domestica* (*Pd*), *P. armeniaca* (*Par*), *P. persica* (*Pp*), *Pyrus communis* (*Pyrco*), *Populus trichocarpa* (*Poptri*), *Vitis vinifera* (*Vv*), *Arabidopsis thaliana* (*At*), *Malus domestica* (*Md*).

**A**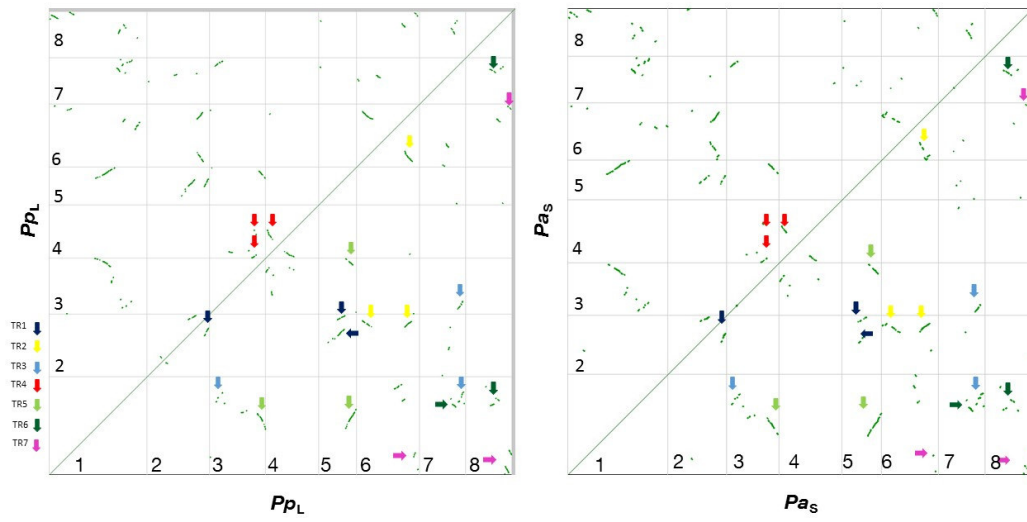**B**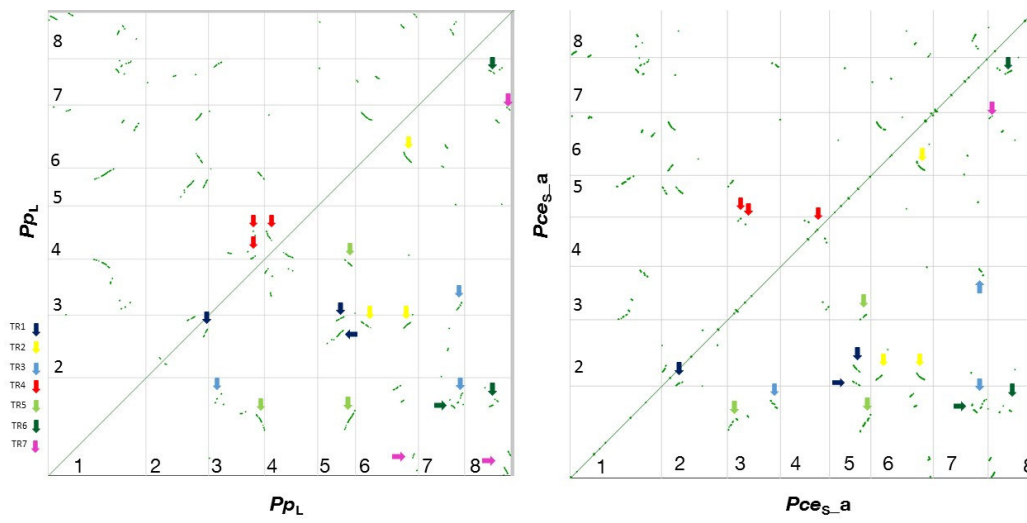**C**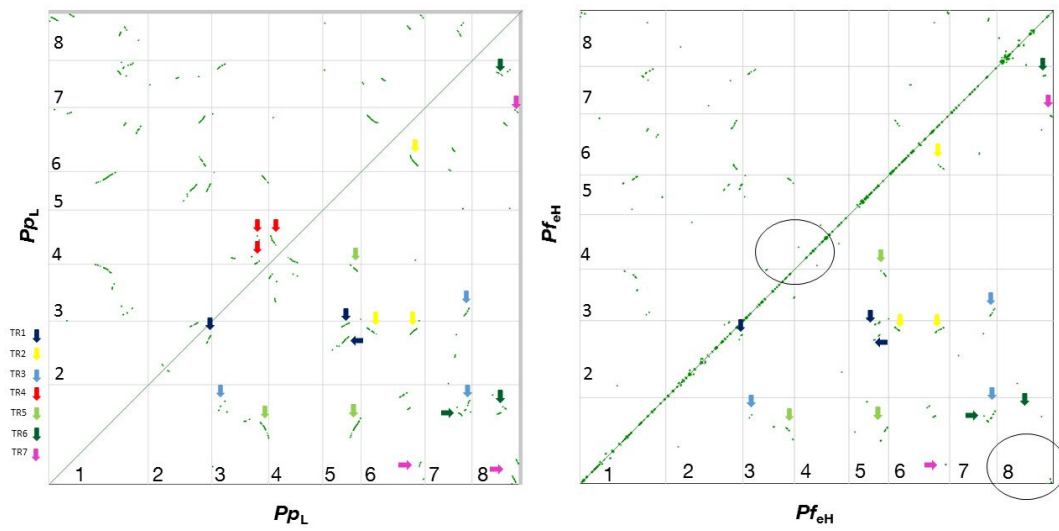

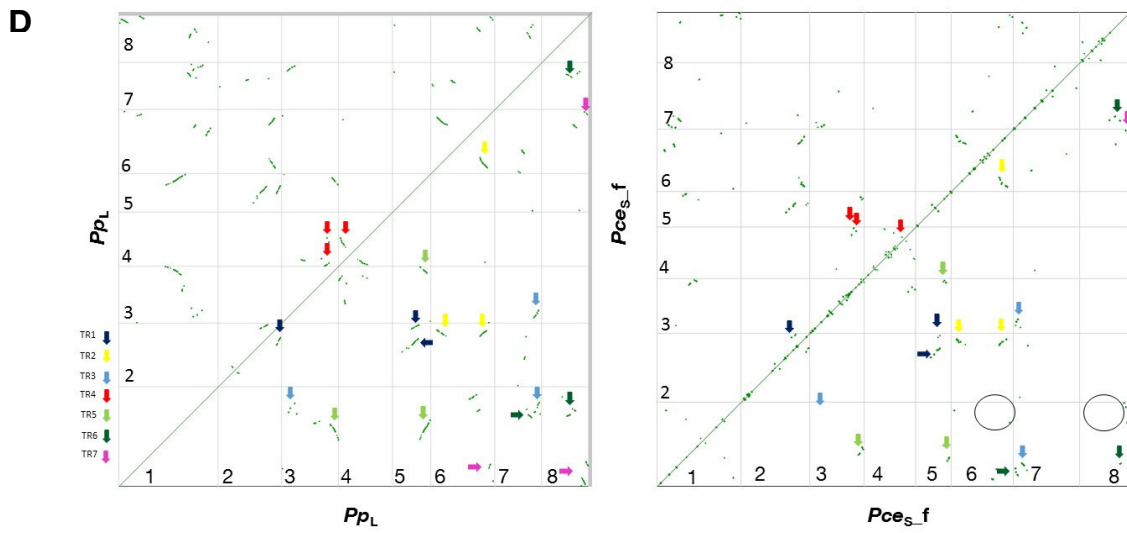

**Figure S8** Synmap2 plots of self-self comparisons between (A) *Prunus persica* 'Lovell' ( $Pp_L$ ) and *P. avium* 'Sato Nishiki' ( $Pa_S$ ), (B) *P. fruticosa* 'Hármashatárhegy' ( $Pf_{eH}$ ), (C) *P. cerasus\_avium* 'Schattenmorelle' ( $Pces_a$ ), (D) *P. cerasus\_fruticosa* 'Schattenmorelle' ( $Pces_f$ ) for the identification of triplicated regions (TR) 1-7.



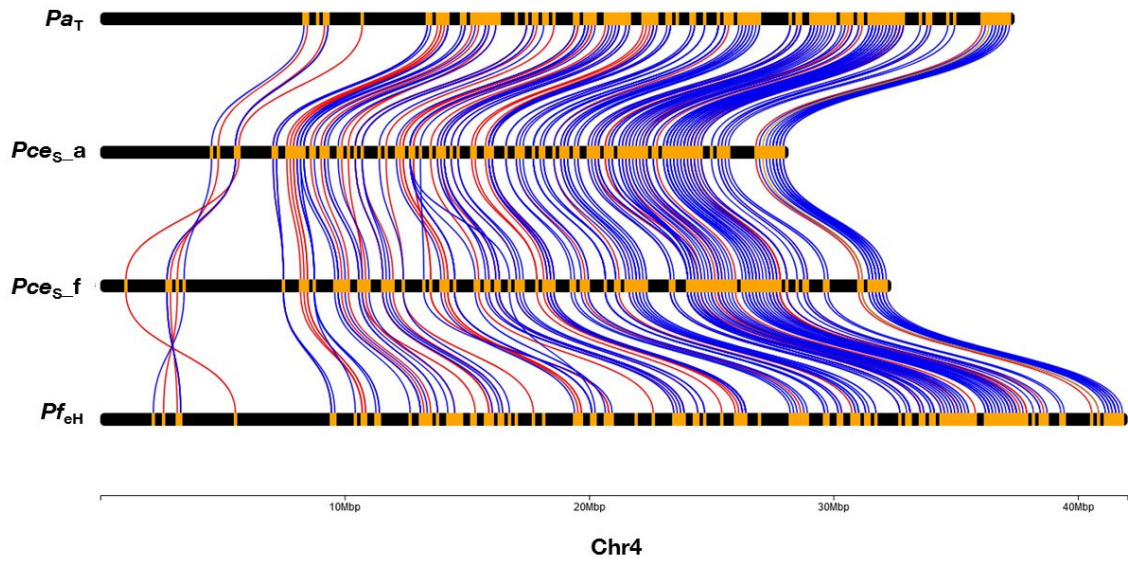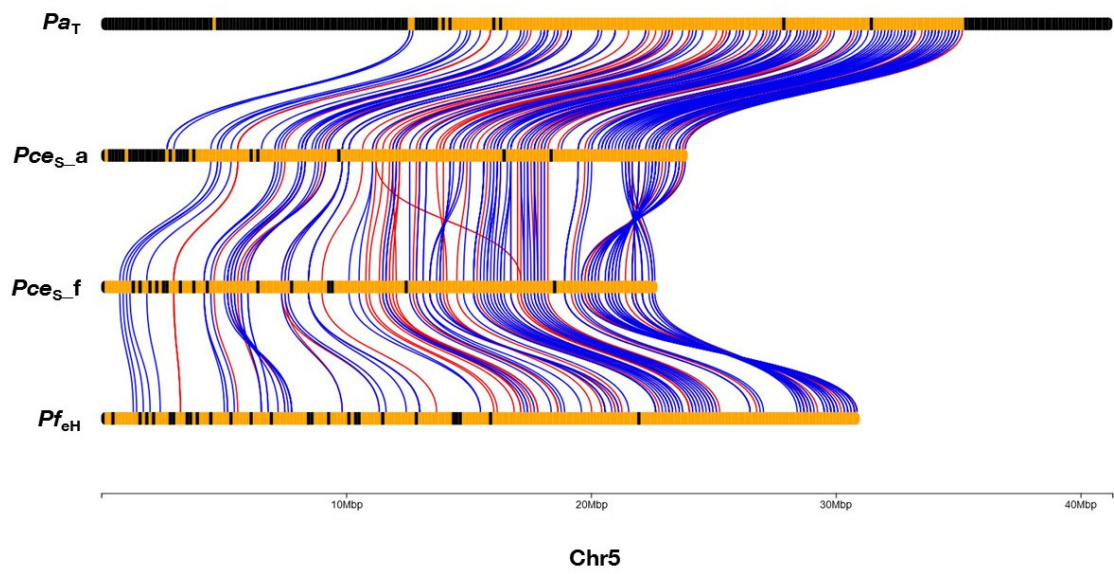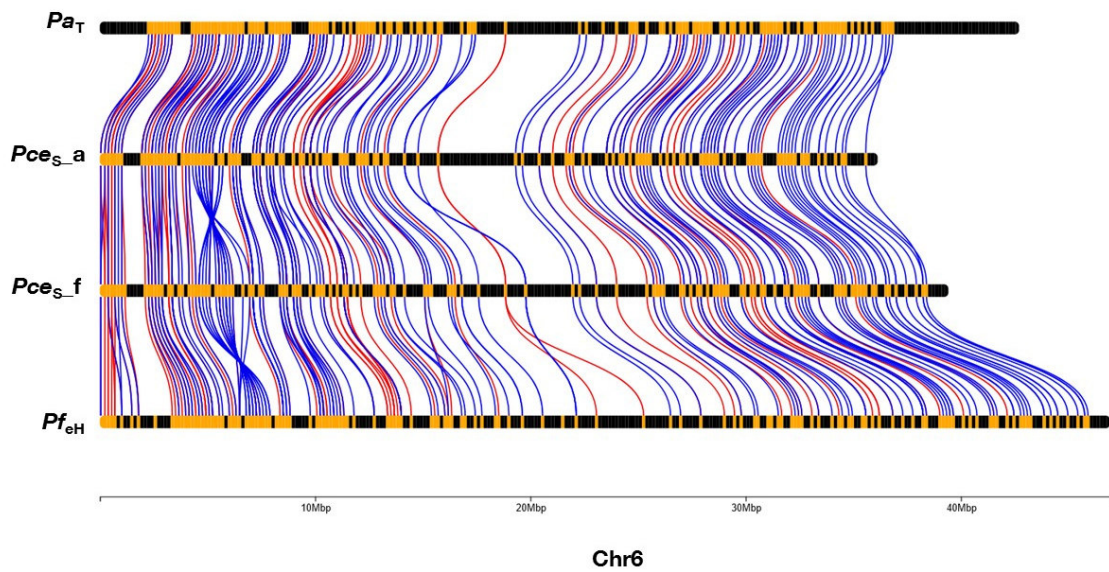

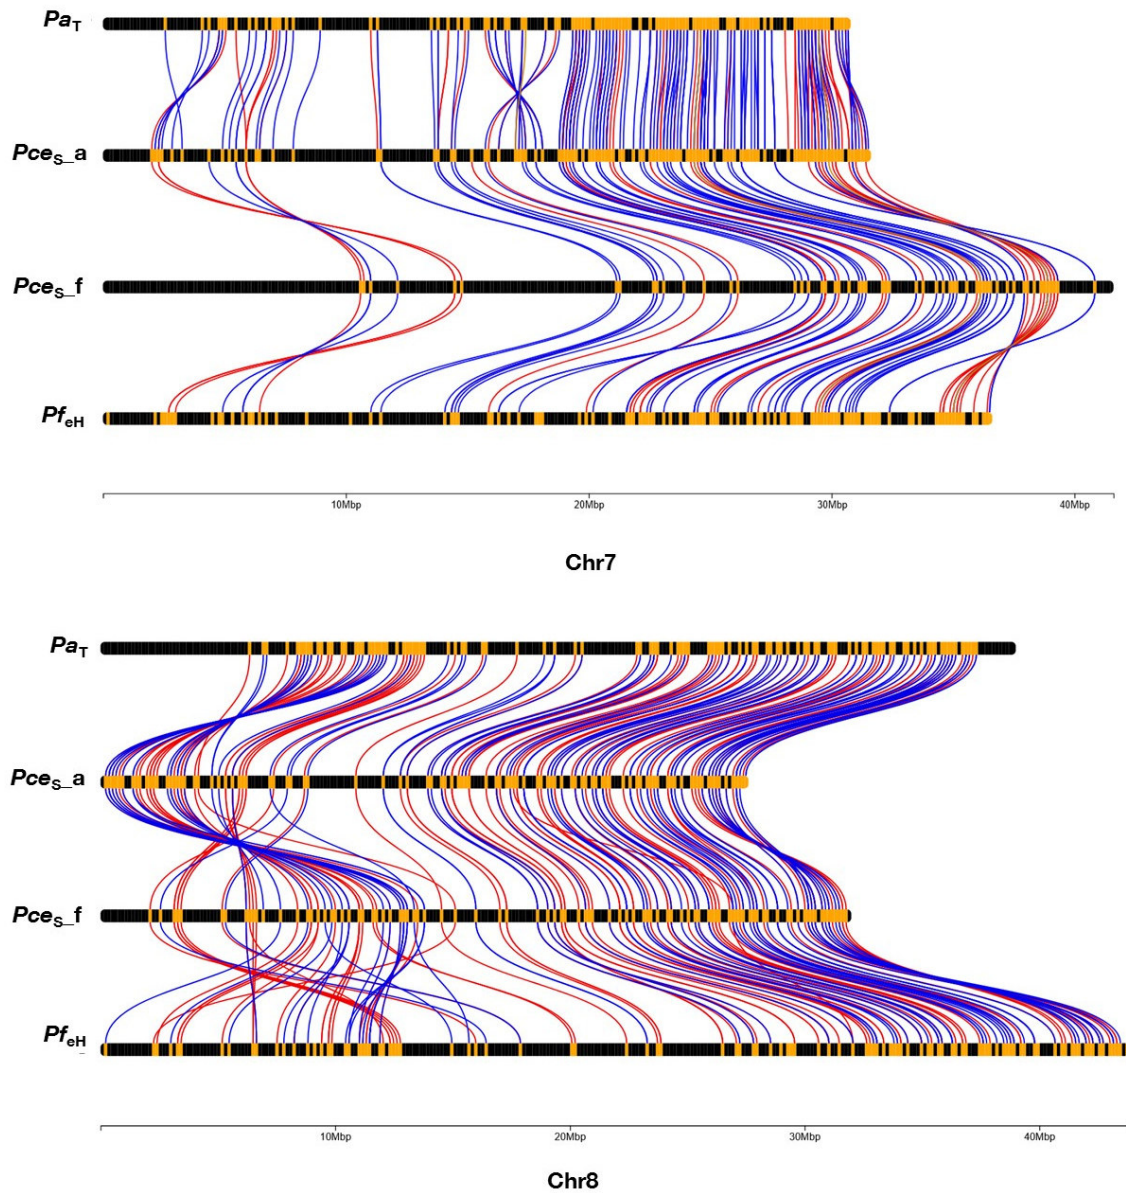

**Figure S9** Positional co-linearity comparison between the two subgenomes *P. cerasus\_avium* 'Schattenmorelle' ( $Pce_{s\_a}$ ), *P. cerasus\_fruticosa* 'Schattenmorelle' ( $Pce_{s\_f}$ ) and *P. avium* 'Tieton' ( $Pa_T$ ), *P. fruticosa* 'Hármashatárhegy' ( $Pf_{eH}$ ), using the molecular markers from the 9+6k SNP array. The plots were generated using the R-software package chromoMap v0.4.1.

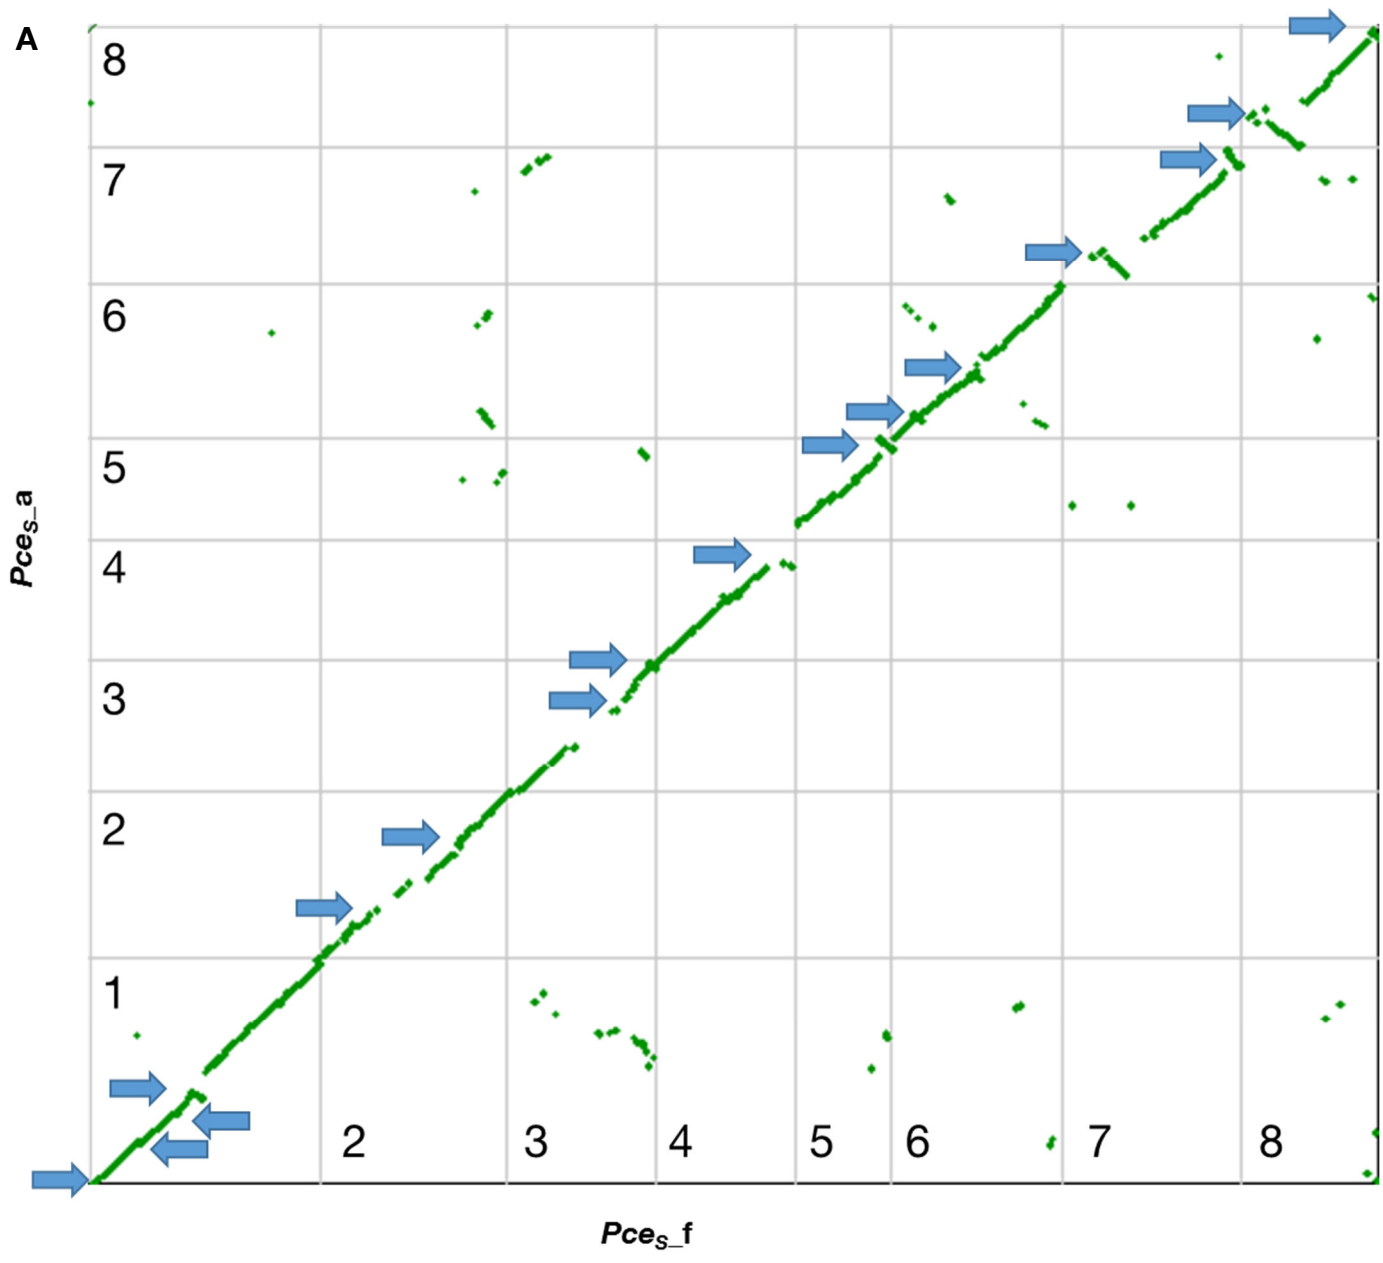

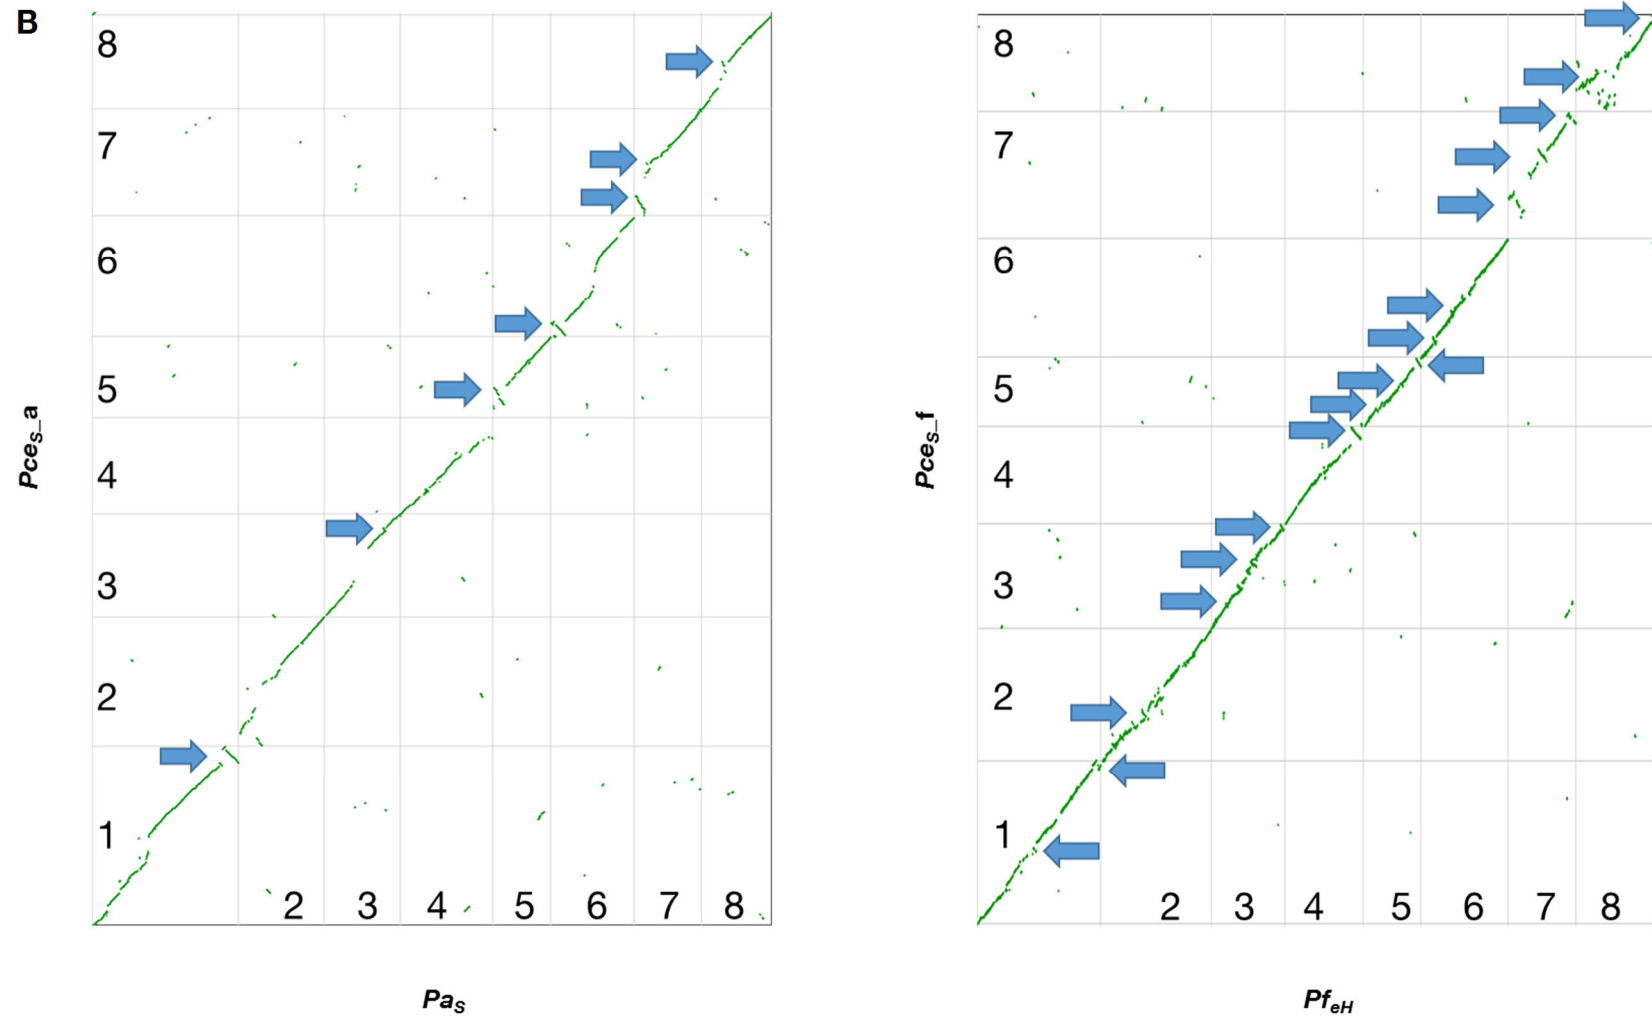

**Figure S10** Synteny between (a) *P. cerasus* subgenome *\_avium* ( $P_{ces\_a}$ ) and *P. cerasus* subgenome *\_fruticosa* ( $P_{ces\_f}$ ), and (b) the subgenomes and the genotypes *Prunus avium* 'Tieton' ( $P_{aT}$ ) and *P. fruticosa* ( $P_{feh}$ ) of the ancestral species *P. avium* and *P. fruticosa*. Blue arrows indicate positions where inversions occurred.



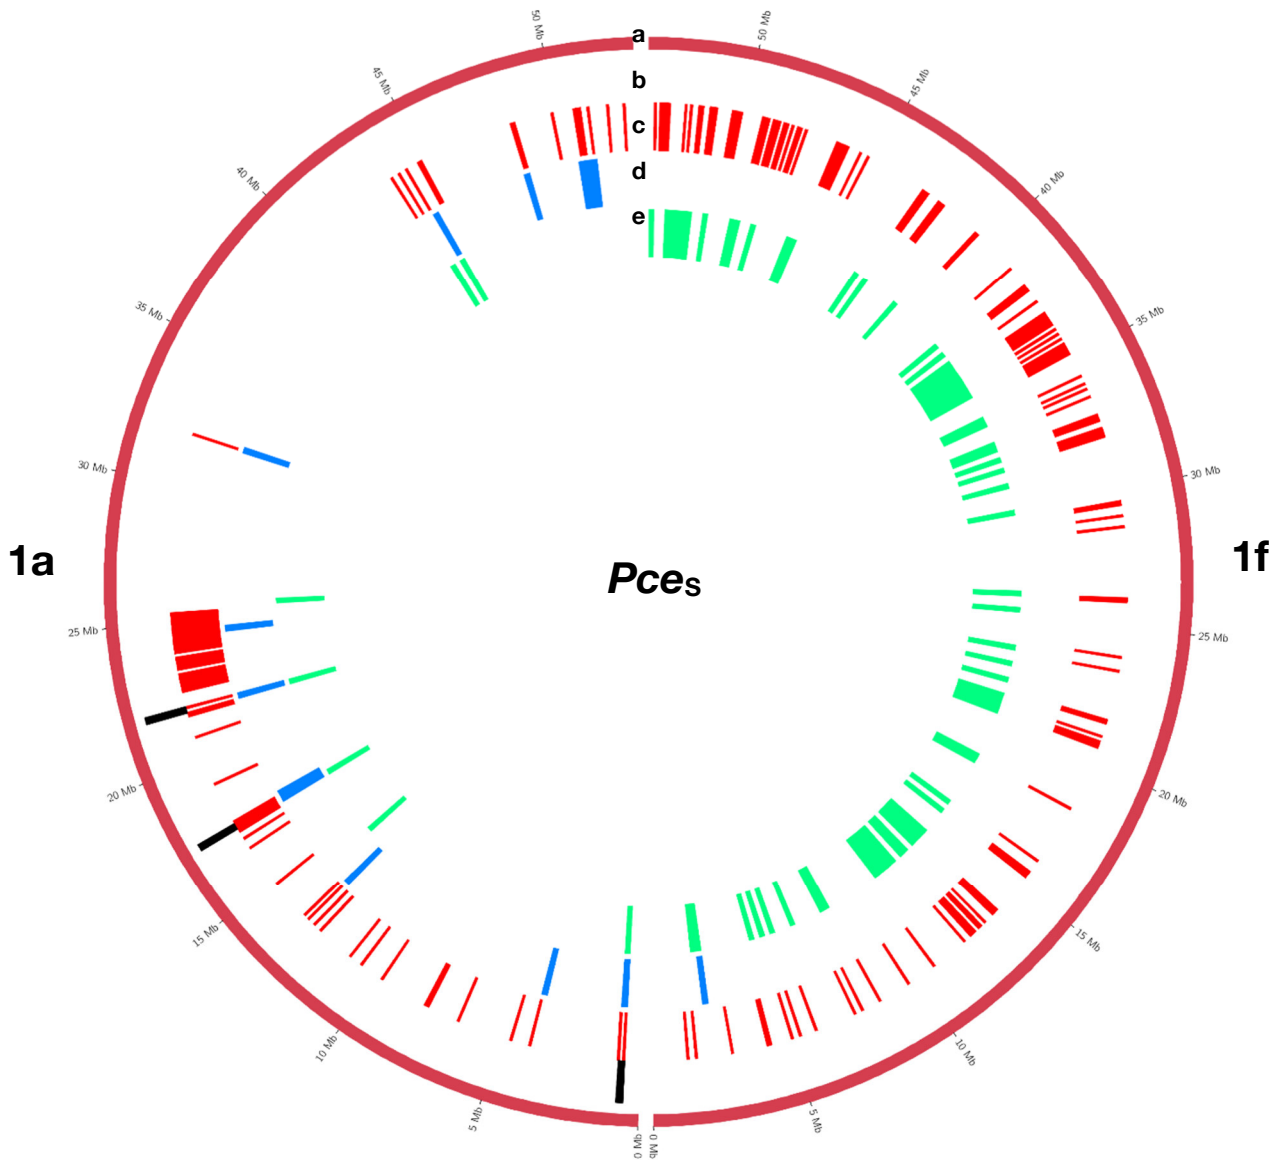

**Figure S11** Detected regions of homoeologous exchanges in the genome of *P. cerasus* 'Schattenmorelle'. Circos plot of 16 single pseudomolecules 1 to 8 (see continuing plots) of the subgenomes of *Pces\_a* and *Pces\_f*. (a) chromosome length (Mb); (b) region in *Pces\_a* and in *Pces\_f* detected that match all three following analysis methods: (c) regions (100k window) were intraspecific %-covered bases from mapped reads (*Pces\_a* to *Pa<sub>T</sub>*, *Pces\_f* to *Pf<sub>eH</sub>*) was < than interspecific %-covered bases from mapped reads (*Pces\_a* to *Pf<sub>eH</sub>*, *Pces\_f* to *Pa<sub>T</sub>*); (d) regions were intraspecific difference of %-covered bases from obtained RNAseq reads (*Pa* and *Pces\_a*, *Pf* and *Pces\_f*) > than interspecific difference of %-covered bases from obtained RNAseq reads (*Pf* and *Pces\_a*, *Pa* and *Pces\_f*); (e) regions were the proportion of transcripts with intraspecific amino acid identity (*Pa<sub>T</sub>* and *Pces\_a*, *Pf<sub>eH</sub>* and *Pces\_f*) < than the proportion of transcripts with interspecific amino acid identity (*Pf<sub>eH</sub>* and *Pces\_a*, *Pa<sub>T</sub>* and *Pces\_f*).

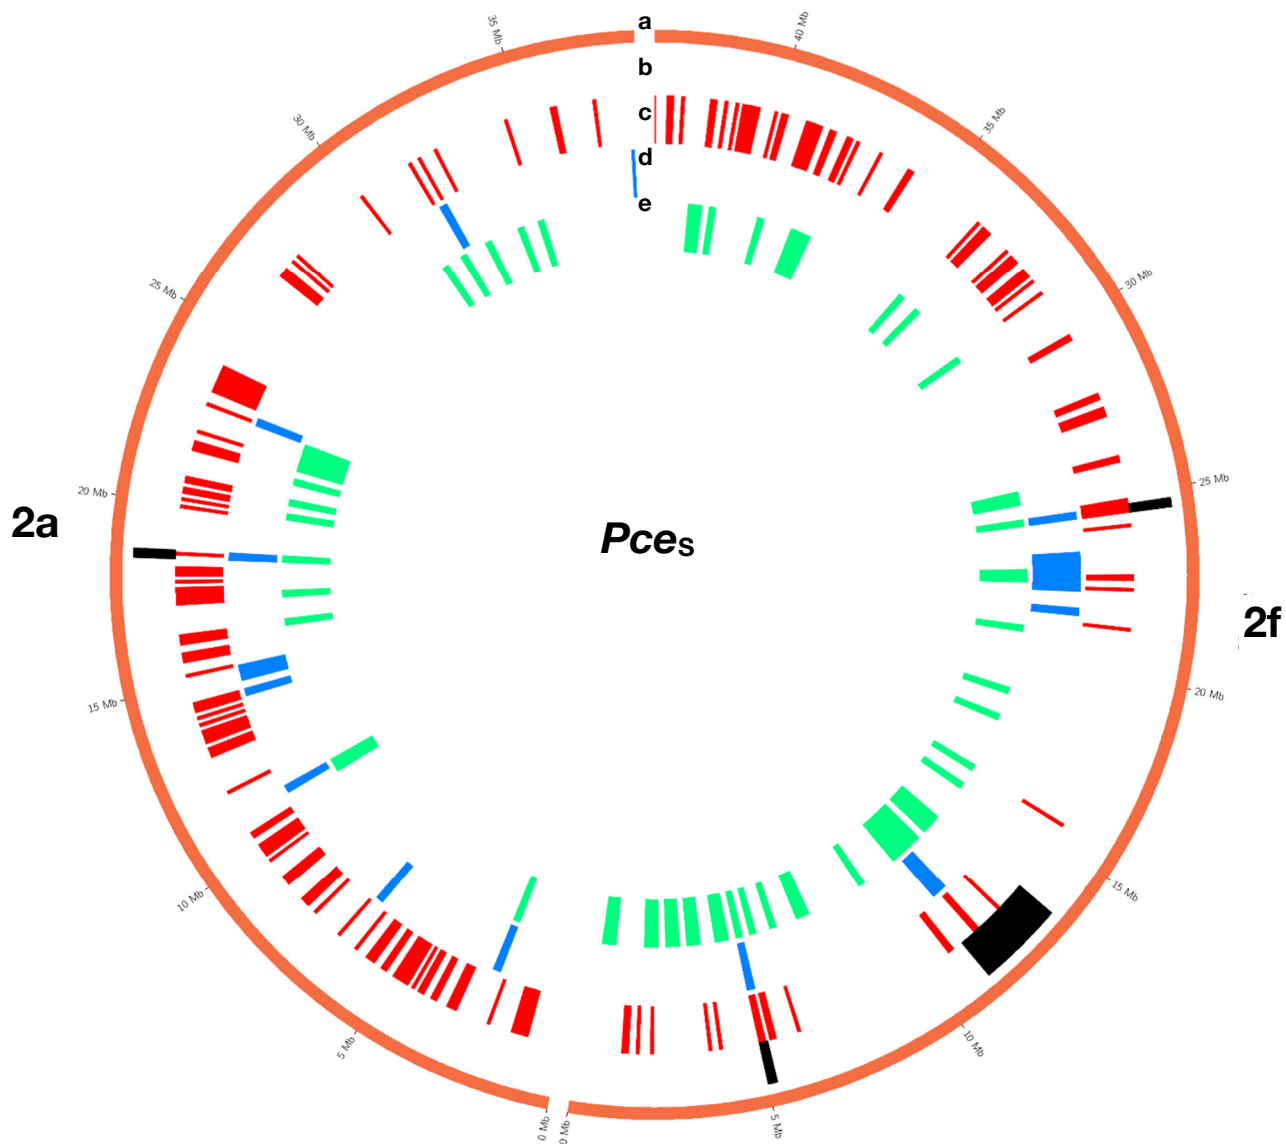

**Continuation of figure S10** Detected regions of homoeologous exchanges in the genome of *P. cerasus* 'Schattenmorelle', pseudomolecule 2.

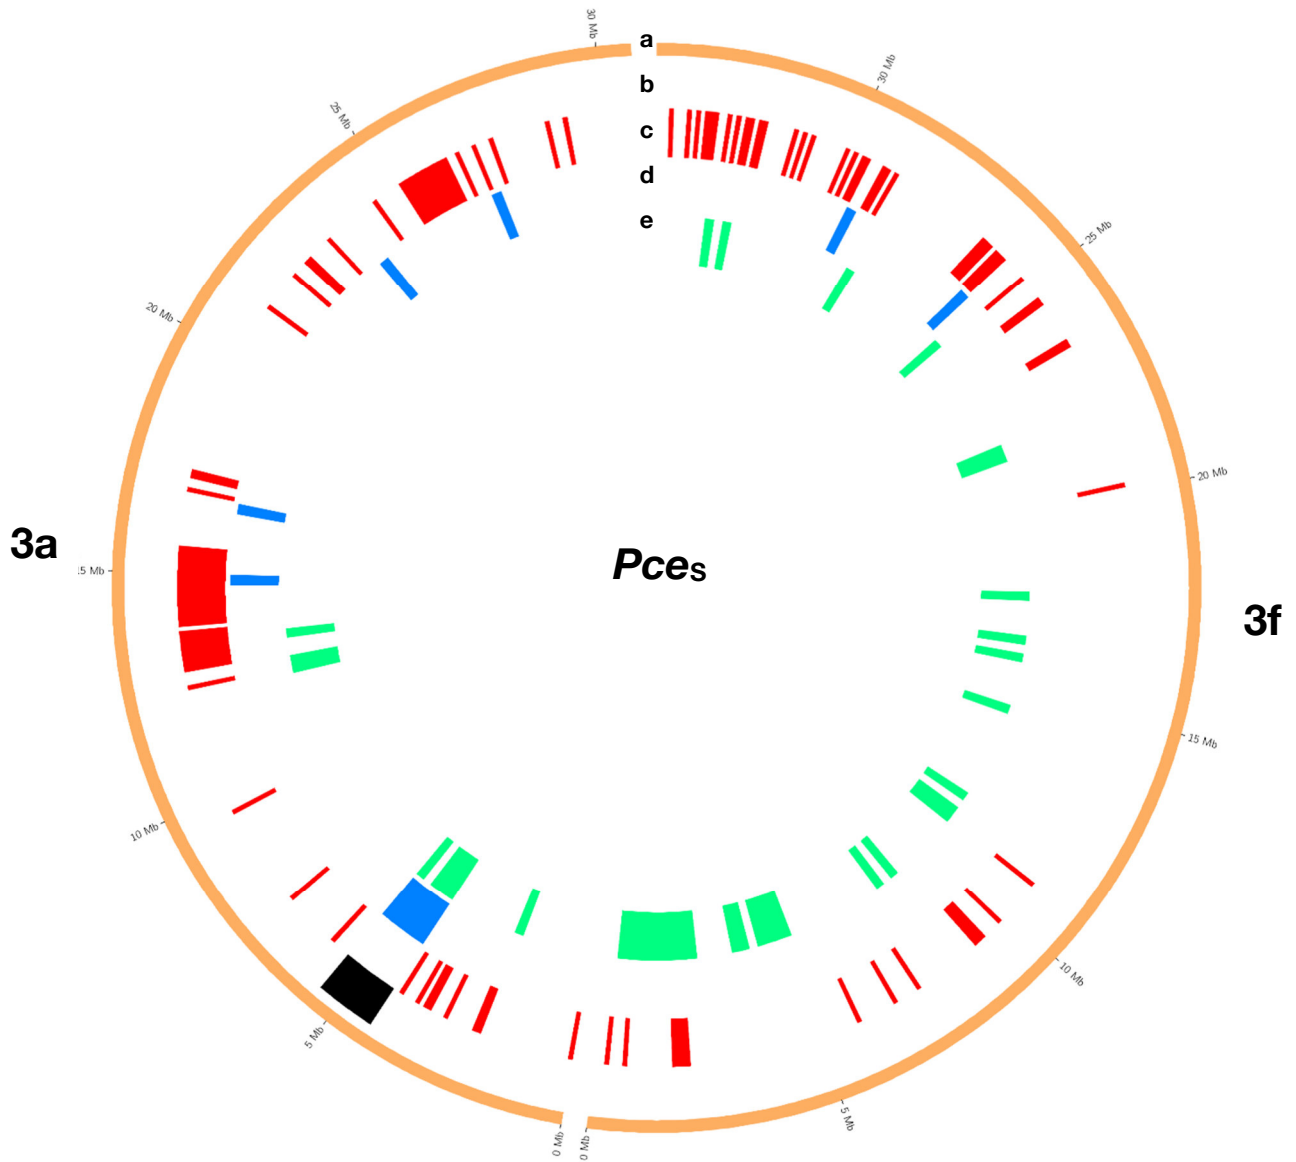

**Continuation of figure S10** Detected regions of homoeologous exchanges in the genome of *P. cerasus* 'Schattenmorelle', pseudomolecule 3.

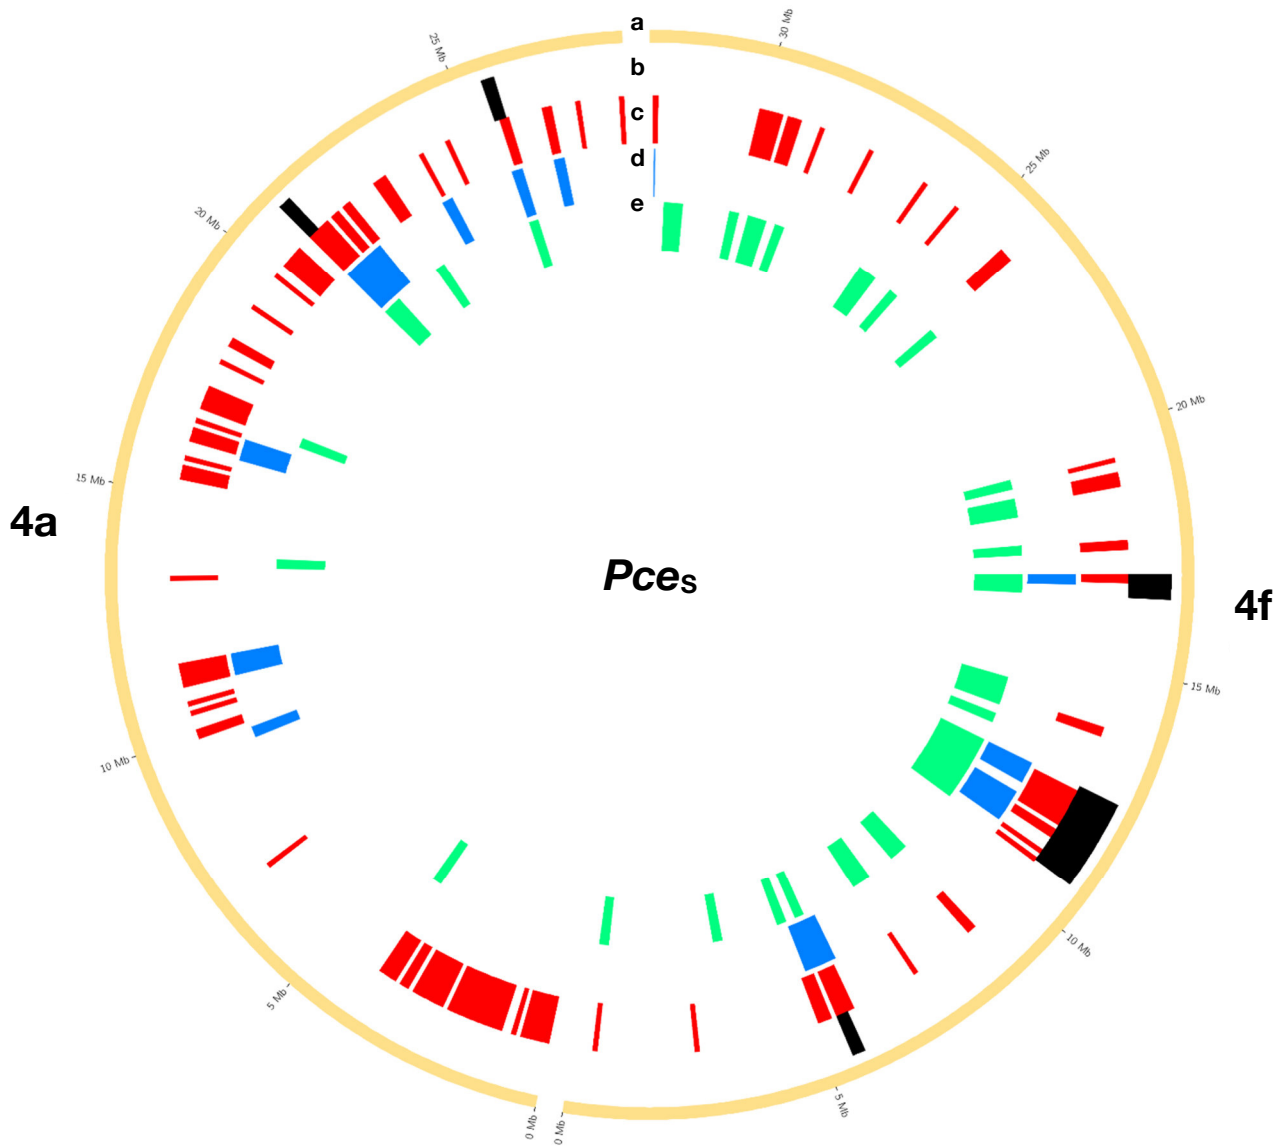

**Continuation of figure S10** Detected regions of homoeologous exchanges in the genome of *P. cerasus* 'Schattenmorelle', pseudomolecule 4.

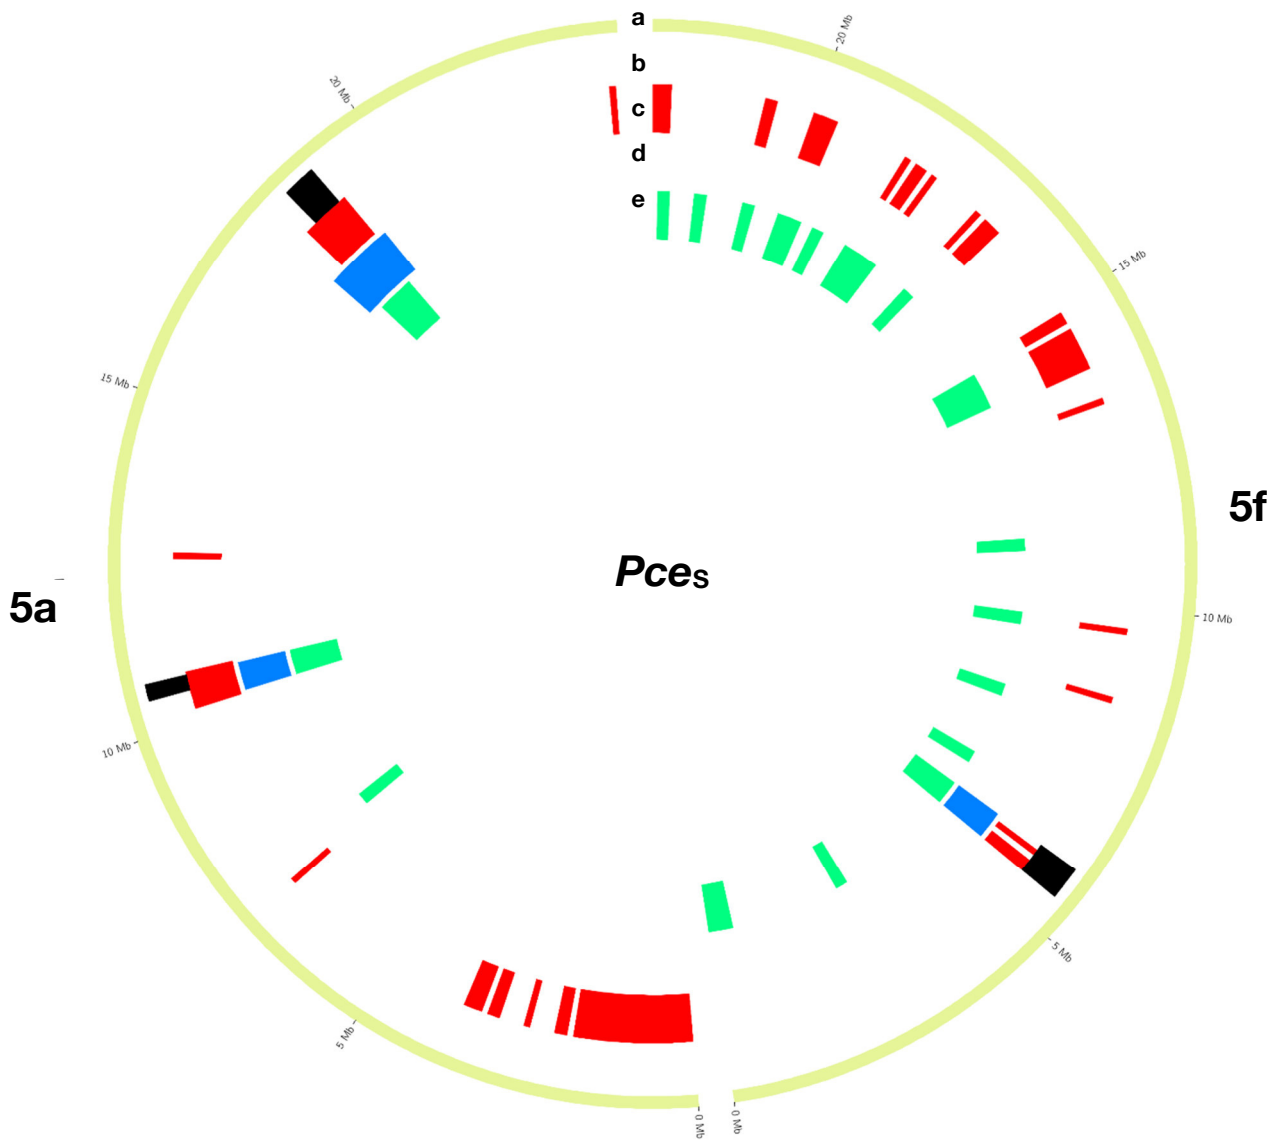

**Continuation of figure S10** Detected regions of homoeologous exchanges in the genome of *P. cerasus* 'Schattenmorelle', pseudomolecule 5.

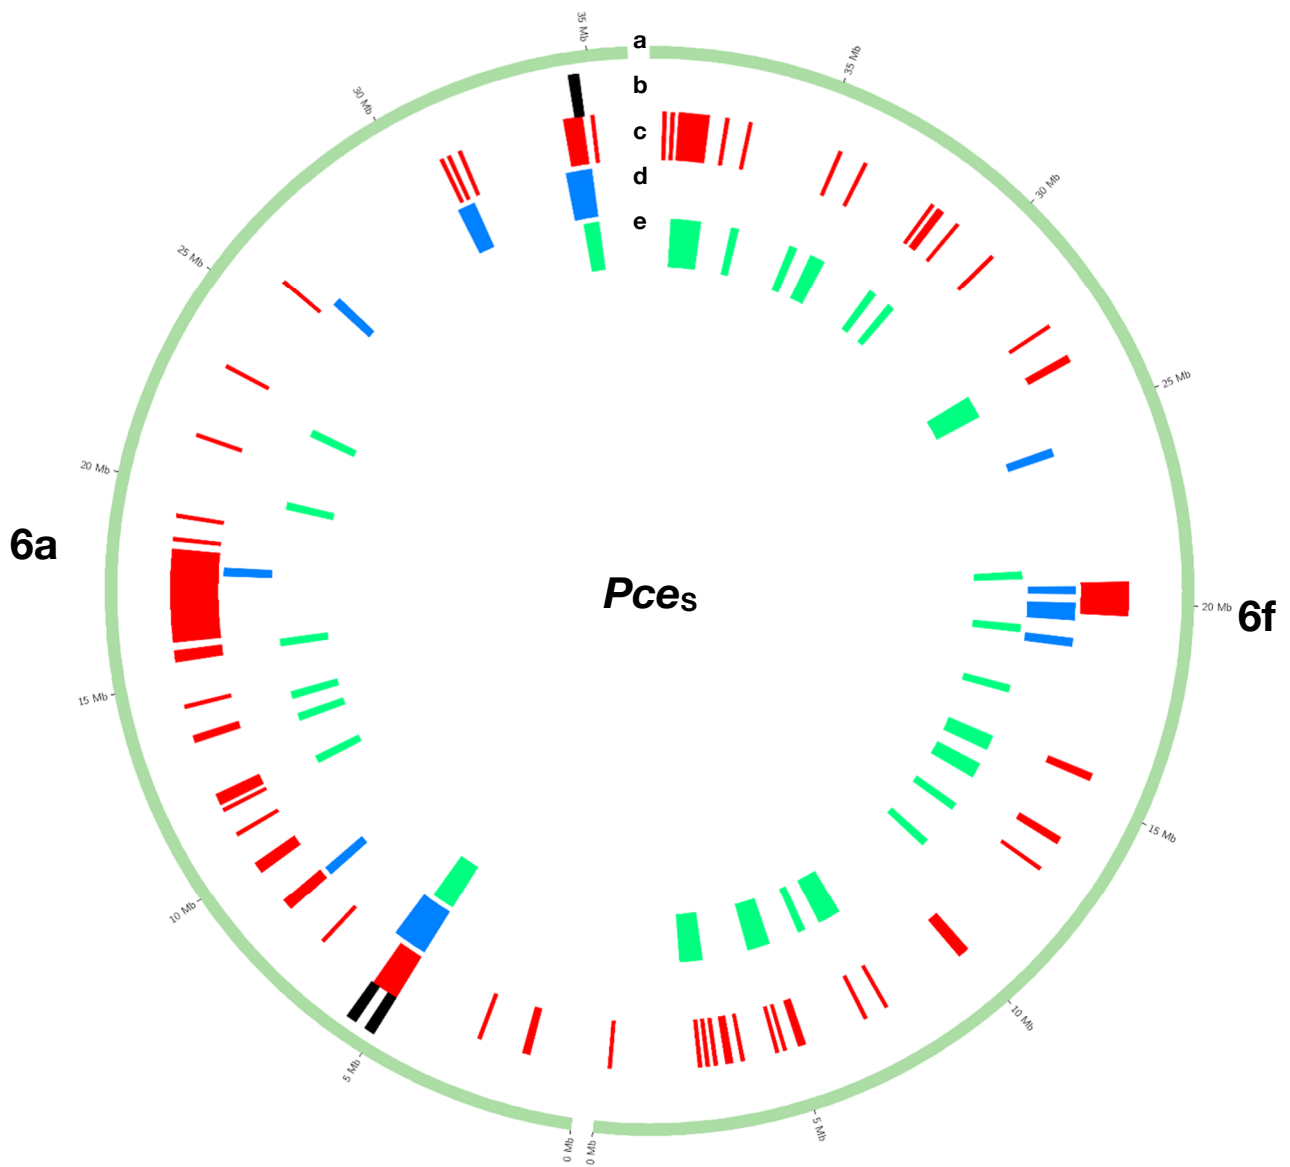

**Continuation of figure S10** Detected regions of homoeologous exchanges in the genome of *P. cerasus* 'Schattenmorelle', pseudomolecule 6.

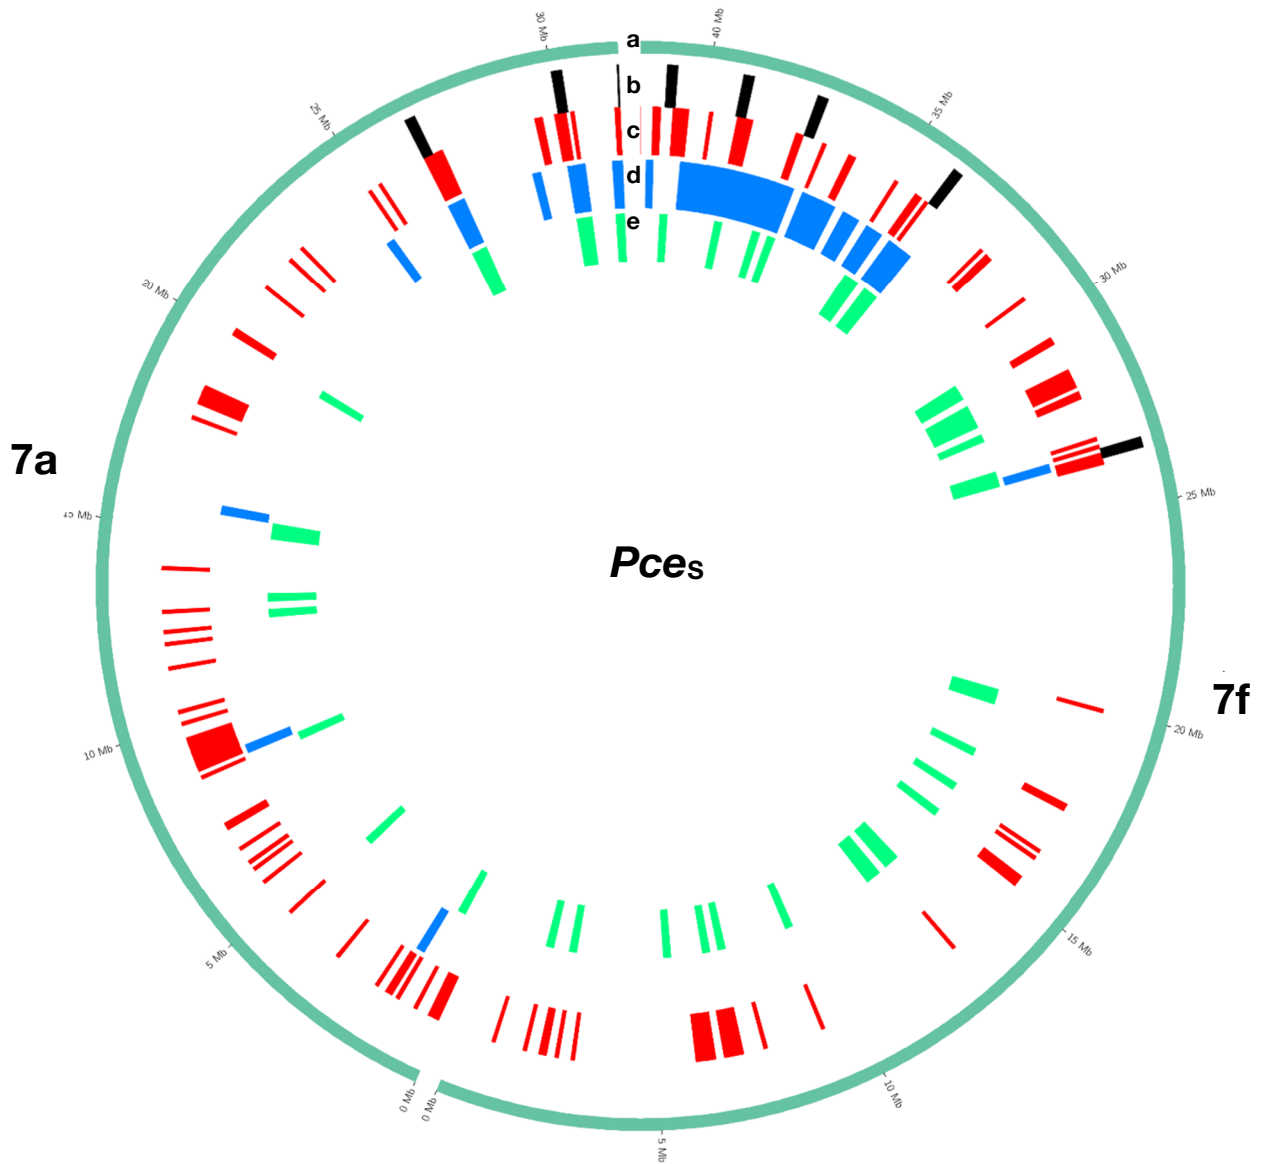

**Continuation of figure S10** Detected regions of homoeologous exchanges in the genome of *P. cerasus* 'Schattenmorelle', pseudomolecule 7.

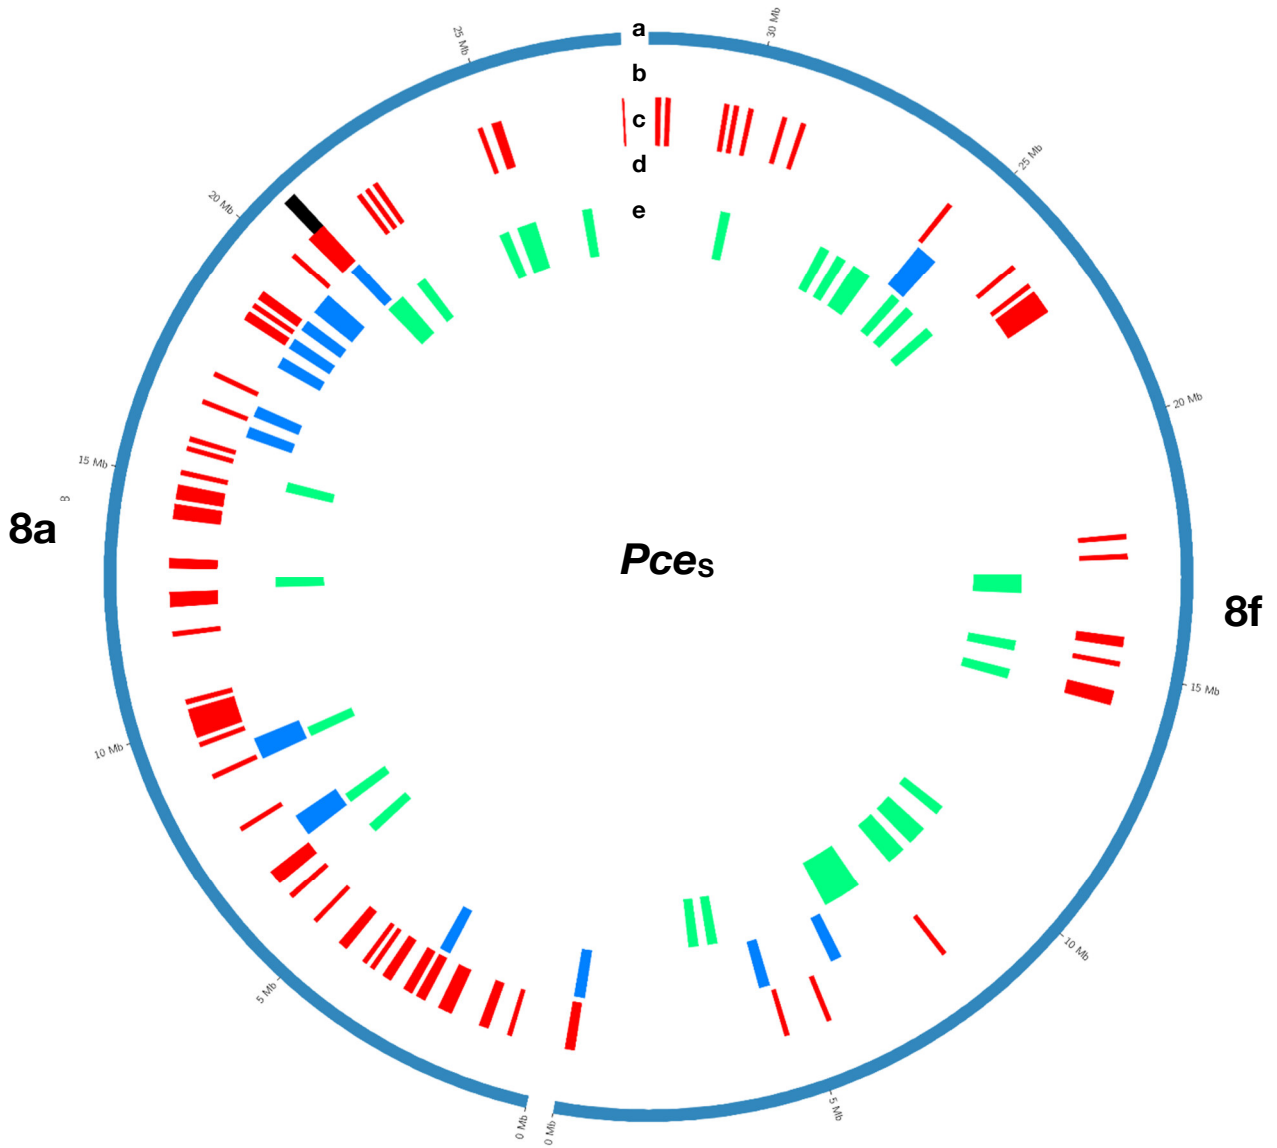

**Continuation of figure S10** Detected regions of homoeologous exchanges in the genome of *P. cerasus* 'Schattenmorelle', pseudomolecule 8.



**Table S1** Properties of the *Pces\_a* and *Pces\_f* subgenomes after contig separation.

|                                | <i>Pces_a</i> | <i>Pces_a</i><br>purged | <i>Pces_f</i> | <i>Pces_f</i><br>purged |
|--------------------------------|---------------|-------------------------|---------------|-------------------------|
| Contigs                        | 1714          | 1058                    | 2036          | 1065                    |
| Total assembly size (Kb)       | 473,2         | 339,3                   | 598,7         | 411,3                   |
| N50 size (bp)                  | 328,2         | 406,2                   | 460,3         | 592,4                   |
| N50 index                      | 434           | 263                     | 358           | 200                     |
| N90 size (bp)                  | 142,7         | 164,1                   | 128,8         | 169,5                   |
| N90 index                      | 1,321         | 777                     | 1,397         | 698                     |
| complete_busco                 | -             | 1340                    | -             | 1270                    |
| % complete                     | -             | 93.1                    | -             | 88.2                    |
| complete_and_single_copy_busco | -             | 1209                    | -             | 982                     |
| complete_and_duplicated_busco  | -             | 131                     | -             | 288                     |
| fragmented_busco               | -             | 25                      | -             | 37                      |
| missing_busco                  | -             | 75                      | -             | 9.2                     |
| total_busco_searched           | -             | 1440                    | -             | 1440                    |

**Table S2** Pseudomolecule statistics for *Pces*

| Pseudomolecule         | Total size (bp) | %   |
|------------------------|-----------------|-----|
| <i>Pces_a_1.0_chr1</i> | 52824182        | 9.3 |
| <i>Pces_a_1.0_chr2</i> | 38212775        | 6.7 |
| <i>Pces_a_1.0_chr3</i> | 30675746        | 5.4 |
| <i>Pces_a_1.0_chr4</i> | 28226313        | 5.0 |
| <i>Pces_a_1.0_chr5</i> | 23885644        | 4.2 |
| <i>Pces_a_1.0_chr6</i> | 35906979        | 6.3 |
| <i>Pces_a_1.0_chr7</i> | 31537404        | 5.5 |
| <i>Pces_a_1.0_chr8</i> | 27735405        | 4.9 |
| <i>Pces_f_1.0_chr1</i> | 53495658        | 9.4 |
| <i>Pces_f_1.0_chr2</i> | 43438225        | 7.6 |
| <i>Pces_f_1.0_chr3</i> | 34378064        | 6.0 |
| <i>Pces_f_1.0_chr4</i> | 32374258        | 5.7 |
| <i>Pces_f_1.0_chr5</i> | 22600031        | 4.0 |
| <i>Pces_f_1.0_chr6</i> | 39437034        | 6.9 |
| <i>Pces_f_1.0_chr7</i> | 41603557        | 7.3 |
| <i>Pces_f_1.0_chr8</i> | 32145936        | 5.7 |
|                        | 568477211       | 100 |

**Table S3** Iso-Seq results

|                                                   | No        |
|---------------------------------------------------|-----------|
| SMRT cells                                        | 2         |
| Circular Consensus Sequencing reads (Raw)         | 4,815,872 |
| Circular Consensus Sequencing reads (Filtered)    | 4,499,940 |
| Circular Consensus Sequencing reads (Full-Length) | 4,476,054 |
| HQ isoforms                                       | 248,218   |
| LQ isoforms                                       | 480       |

**Table S4** Functional annotation results generated by interproscan using BRAKER & GeMoMa combination of ab-initio and homology-based structural gene annotation and statistics

| Interproscan annotations          | No.            | <i>Pces_a</i> | <i>Pces_f</i> | Contigs_A    | Contigs_F     |
|-----------------------------------|----------------|---------------|---------------|--------------|---------------|
| Coils                             | 26427          | 12258         | 11902         | 983          | 1284          |
| Gene3D                            | 135081         | 63213         | 60649         | 4627         | 6592          |
| Hamap                             | 2773           | 1323          | 1217          | 108          | 125           |
| PANTHER                           | 217622         | 100591        | 98613         | 7622         | 10796         |
| Pfam                              | 155028         | 72373         | 69489         | 5449         | 7717          |
| Phobius                           | 314975         | 147171        | 139810        | 11215        | 16779         |
| PIRSF                             | 9105           | 4208          | 4187          | 328          | 382           |
| PRINTS                            | 85141          | 40737         | 37507         | 2991         | 3906          |
| ProDom                            | 1125           | 484           | 512           | 59           | 70            |
| ProSitePatterns                   | 32422          | 15152         | 14560         | 1097         | 1613          |
| ProSiteProfiles                   | 89962          | 42225         | 40678         | 3050         | 4009          |
| SignalP_EUK                       | 11628          | 5290          | 5360          | 373          | 605           |
| SMART                             | 77106          | 36030         | 35078         | 2420         | 3578          |
| SUPERFAMILY                       | 104068         | 48770         | 46637         | 3666         | 4995          |
| TIGRFAM                           | 19751          | 9185          | 8780          | 756          | 1030          |
| TMHMM                             | 99627          | 47068         | 43744         | 3488         | 5327          |
| <b>Sum</b>                        | <b>1381841</b> | <b>646078</b> | <b>530906</b> | <b>48232</b> | <b>156625</b> |
| <b>Genes</b>                      |                |               |               |              |               |
| total                             | 60123          | 26947         | 27876         | 2122         | 3178          |
| annotated                         | 56047          | 25152         | 25960         | 1988         | 2947          |
| <b>Transcripts</b>                |                |               |               |              |               |
| total                             | 107508         | 49698         | 48576         | 3799         | 5435          |
| annotated                         | 103243         | 47807         | 46585         | 3657         | 5194          |
| annotated GO                      | 71870          | 33554         | 32284         | 2561         | 3471          |
| annotated pathways                | 9114           | 4317          | 4115          | 299          | 383           |
| Mean length (bp)                  | 3580           | 3864          | 3808          | 4031         | 3565          |
| Mean length of predicted proteins | 469            | 469           | 460           | 466          | 450           |

**Table S5** Mapping of marker sequences to *Prunus cerasus* 'Schattenmorelle' (*Pces*) genome

| Genetic map | No. of marker input | No. of mapped markers |
|-------------|---------------------|-----------------------|
| M172x25-F1  | 1795                | 1514                  |
| US-F1       | 1787                | 1506                  |
| 25x25-F1    | 1807                | 1510                  |
| Montx25-F1  | 1795                | 1517                  |
| RE-F1       | 1856                | 1509                  |

**Table S6** Position of inversions within the subgenomes of *Pces* indicated by collinearity of marker positions.

| Chr. <i>Pces</i> vs. <i>Pces</i> | position of inversion in Mbp | Chr. <i>Pces_a</i> vs. <i>PaT</i> | position of inversion in Mbp | Chr. <i>Pces_f</i> vs. <i>PfeH</i> | position of inversion in Mbp |
|----------------------------------|------------------------------|-----------------------------------|------------------------------|------------------------------------|------------------------------|
| Chr1a                            | 9-11, 42-43, 51-52           | Chr1a                             | 49-52                        | Chr1f                              | 50-53                        |
| Chr1f                            | 11-12, 43-44, 52-53          | Chr1a                             | 56-62                        | Chr1f                              | 61-65                        |
| Chr2a                            | -                            | Chr2a                             | -                            | Chr2f                              | -                            |
| Chr2f                            | -                            | Chr2a                             | -                            | Chr2f                              | -                            |
| Chr3a                            | 30-32                        | Chr3a                             | -                            | Chr3f                              | 7-9, 33-34                   |
| Chr3f                            | 33-34                        | Chr3a                             | -                            | Chr3f                              | 8-9, 37-39                   |
| Chr4a                            | 1-7                          | Chr4a                             | -                            | Chr4f                              | 1-7                          |
| Chr4f                            | 1-7                          | Chr4a                             | -                            | Chr4f                              | 1-7                          |
| Chr5a                            | 8-9, 15-17, 22-25            | Chr5a                             | -                            | Chr5f                              | 6-7, 15-17, 19-22            |
| Chr5f                            | 6-7, 15-17, 19-22            | Chr5a                             | -                            | Chr5f                              | 7-8, 20-21, 28-31            |
| Chr6a                            | 5-6                          | Chr6a                             | -                            | Chr6f                              | 5-7                          |
| Chr6f                            | 5-7                          | Chr6a                             | -                            | Chr6f                              | 6-8                          |
| Chr7a                            | 1-7, 29-32                   | Chr7a                             | 1-7, 17-18, 29-32            | Chr7f                              | 10-15, 38-42                 |
| Chr7f                            | 10-15, 38-42                 | Chr7a                             | 1-5, 17-19, 31-32            | Chr7f                              | 1-7, 32-37                   |
| Chr8a                            | 1-9, 26-28                   | Chr8a                             | 1-9                          | Chr8f                              | 1-15                         |
| Chr8f                            | 1-15, 30-32                  | Chr8a                             | 1-12                         | Chr8f                              | 1-13                         |

**Note S1** Calculation of the 70% quantile from IAA.

For each reference species, the best iAA per transcript was determined. Midpoints of all transcripts were calculated. Windows of size 0.5Mb centered at these midpoints were used to determine the 70% quantile of the iAA values. Therefor all transcripts with midpoint in this windows were collected. The 70% quantile was computed using the corresponding iAA values and ignoring missing values. The 70% quantile was plotted in a graph against the two subgenomes *Pces\_a* and *Pces\_f* of *P. cerasus* cv 'Schattenmorelle'. A higher IAA value of proteins from *P. avium* cv 'Tieton' (*Pa<sub>T</sub>*) in comparison to proteins from *P. fruticosa* ecotype Hármashtárhegy (*Pf<sub>eH</sub>*) is expected for *Pces\_a* and vice versa. An example is given below (Example plot 1). The blue line represents the 70% quantile value obtained from the comparison between *Pces\_a* and *Pa<sub>T</sub>*. Due to the relation of both species, the blue line is nearly 1, except for some regions. The red line represents the comparison between *Pces\_f* and *Pf<sub>eH</sub>*. The species are not related which is indicated by a lower 70% quantile value. In case of a translocation between *Pces\_a* and *Pces\_f*, the values of the red line will increase whereas the value of the blue line will decrease. An example is given in Example plot 2. Note S2 contains 8 plots were the 70% quantile values of IAA obtained from comparisons between *P. avium* 'Tieton' (*Pa<sub>T</sub>*) and *P. fruticosa* ecotype Hármashtárhegy (*Pf<sub>eH</sub>*) with *P. cerasus* 'Schattenmorelle' (*Pces*) were plotted against the chromosomes of subgenome *Pces\_a*. Additionally, eight plots were the 70% quantile values of IAA obtained from comparisons between *Pa<sub>T</sub>* and *Pf<sub>eH</sub>* with *Pces* were plotted against the chromosomes of subgenome *Pces\_f*. The same was calculated for the 14 reference species used in the final annotation procedure.

Comparison of 70%-quantile of IAA between transcripts from *P. cerasus* cv 'Schattenmorelle' assigned to *P. fruticosa* ecotype Hármashatárhegy (Prufu, red) or *P. avium* cv 'Tieton' (Pruavi, blue) for each chromosome.

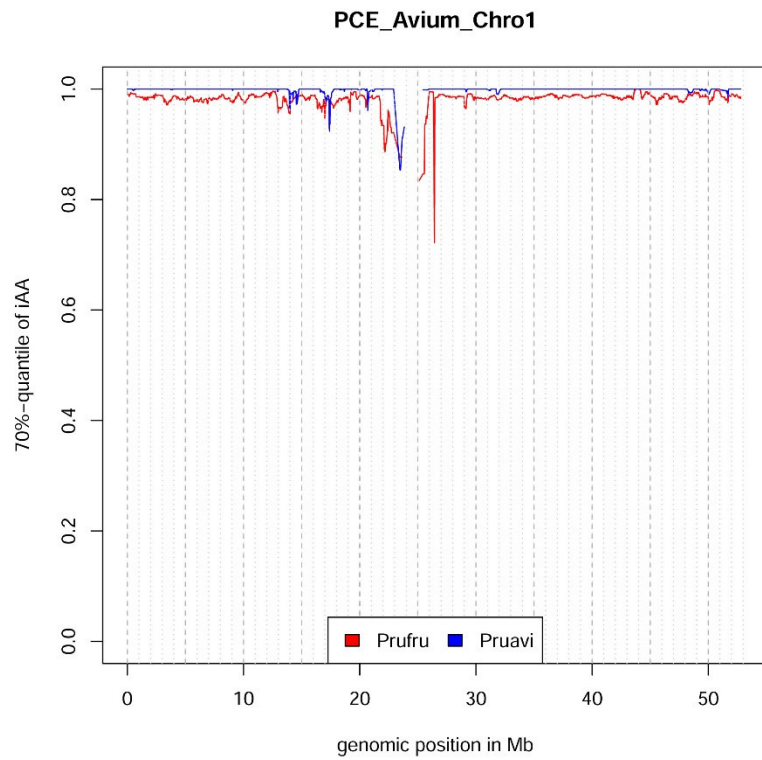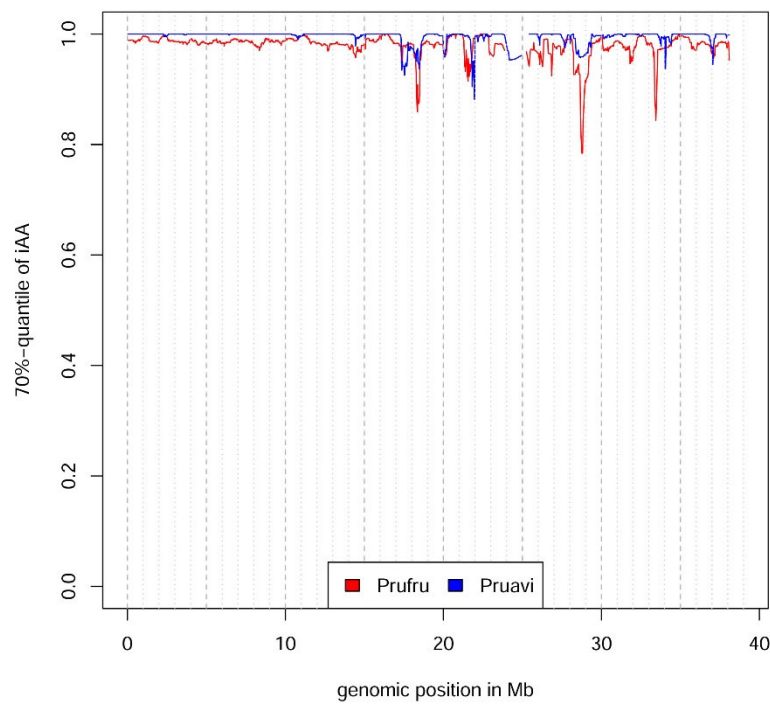



**PCE\_Avium\_Chro3**

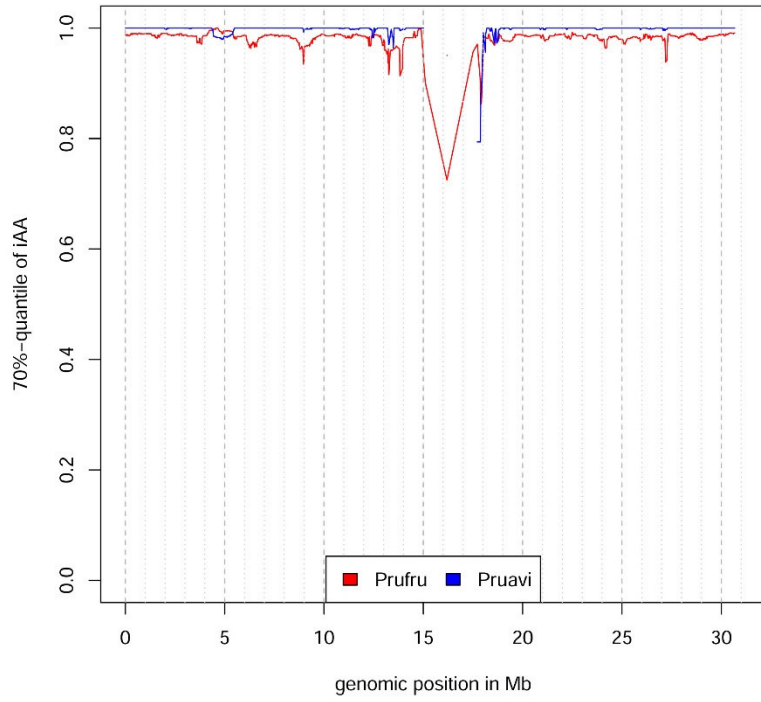

**PCE\_Avium\_Chro4**

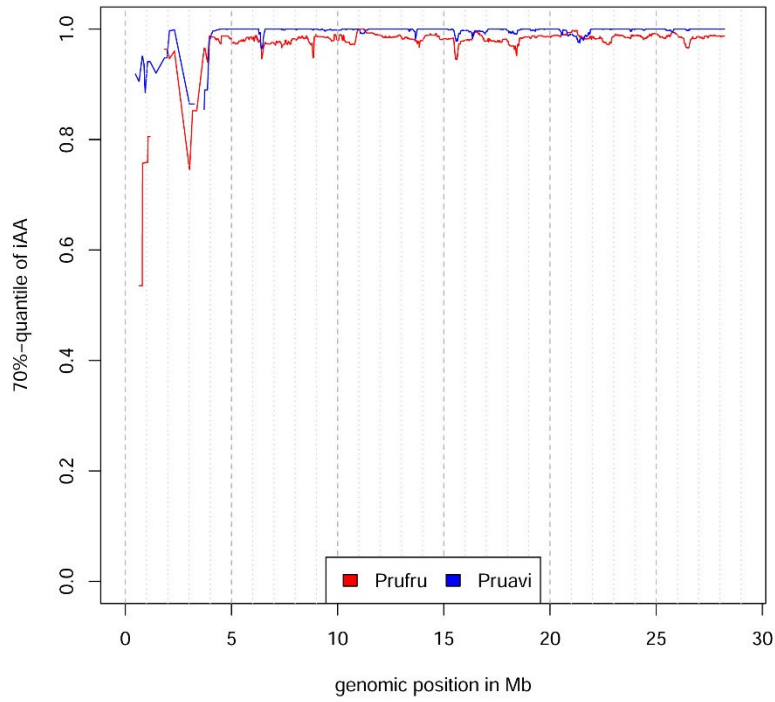

**PCE\_Avium\_Chro5**

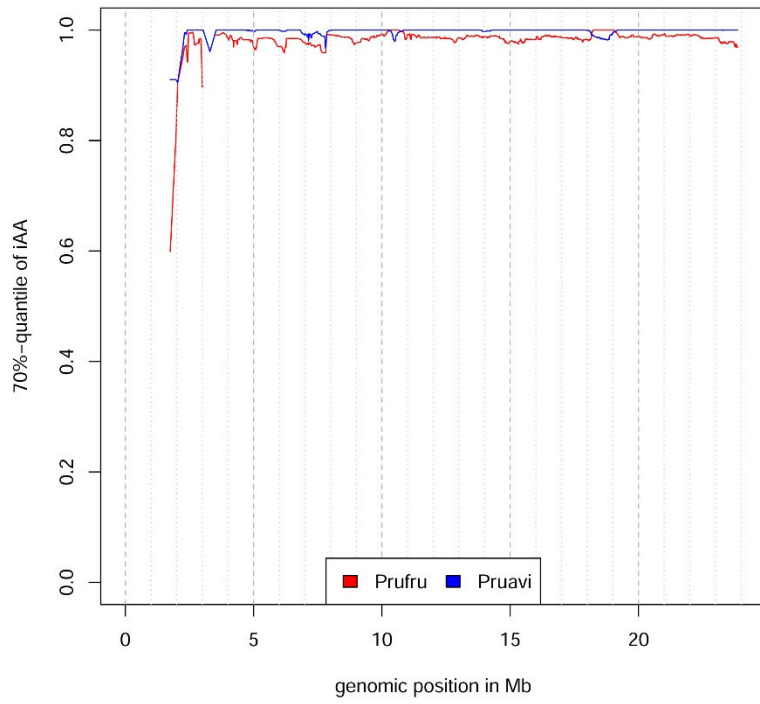

**PCE\_Avium\_Chro6**

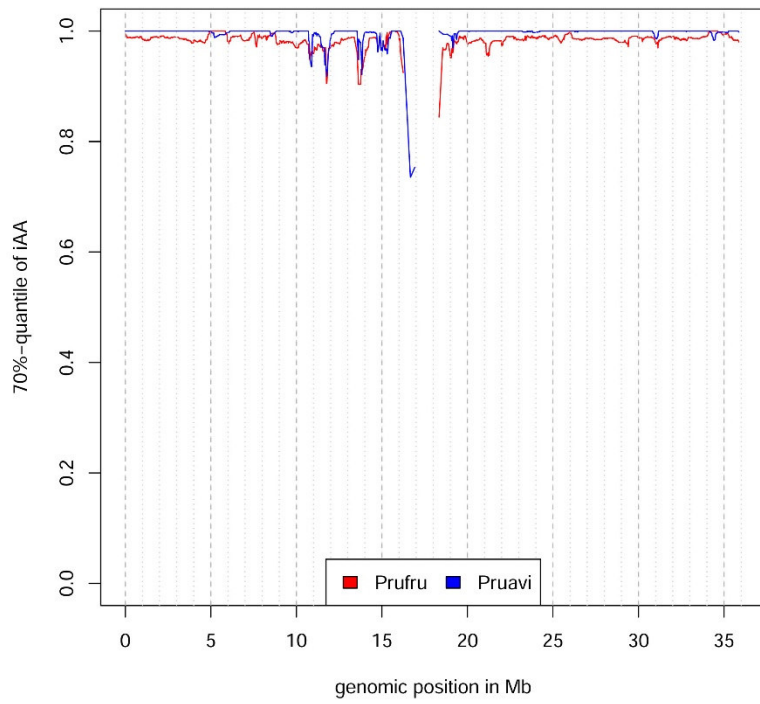

**PCE\_Avium\_Chro7**

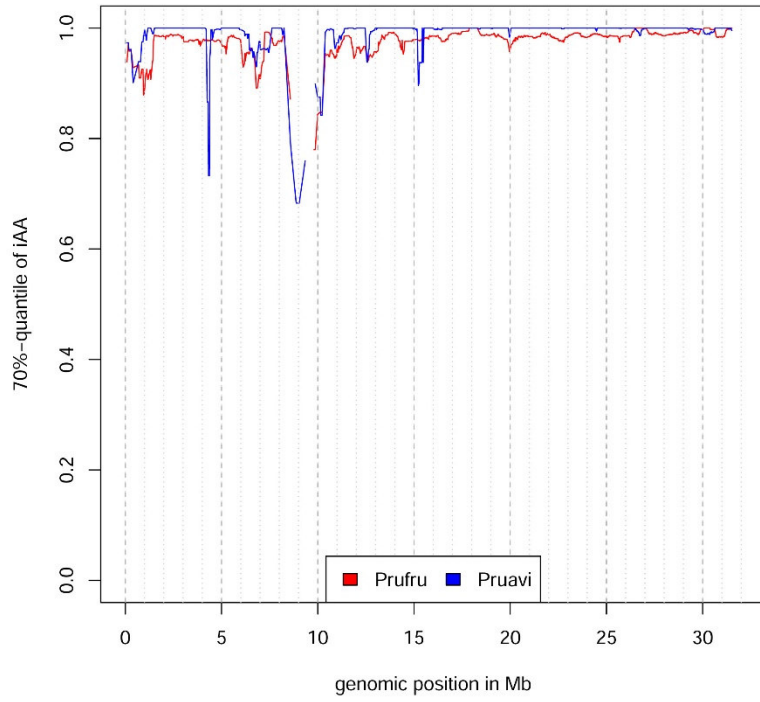

**PCE\_Avium\_Chro8**

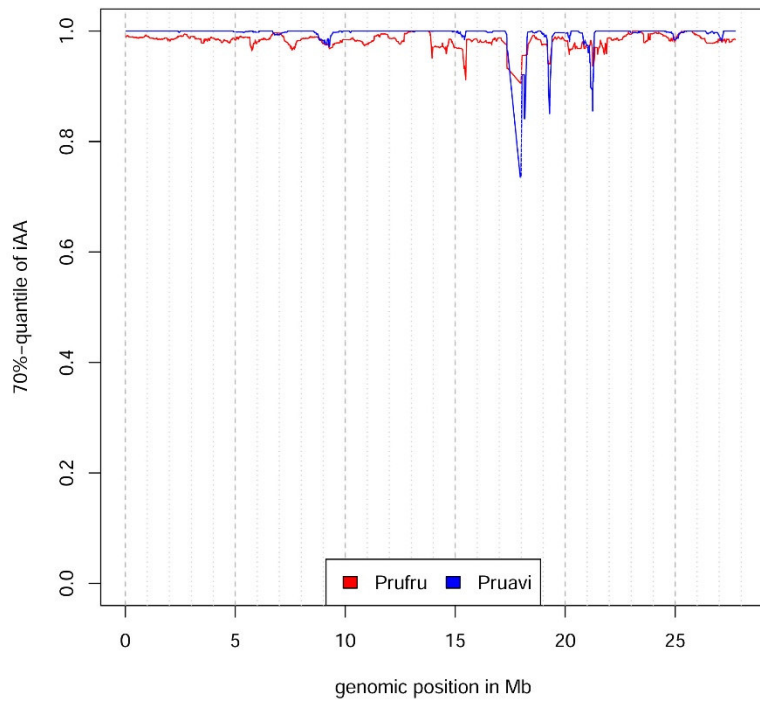

**PCE\_Fruticosa\_Chro1**

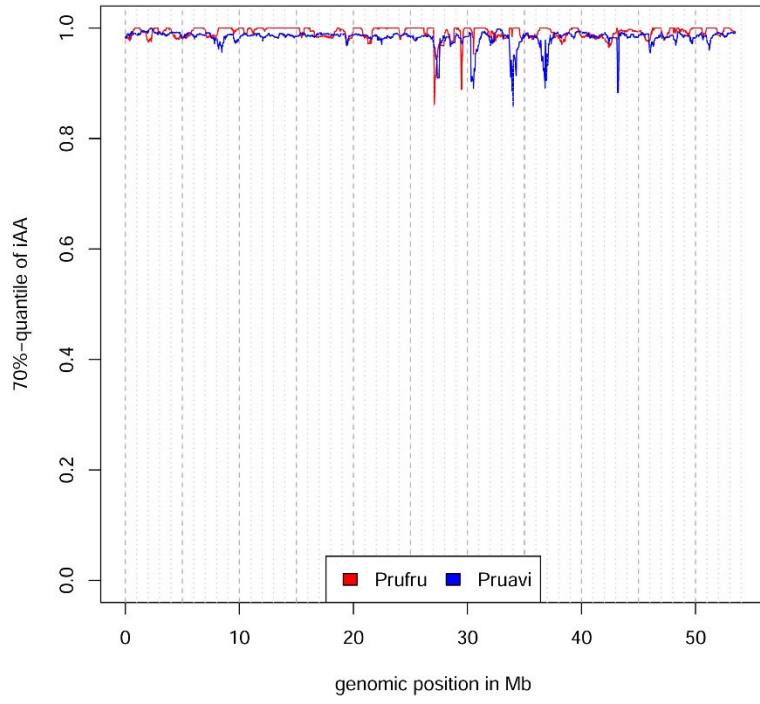

**PCE\_Fruticosa\_Chro2**

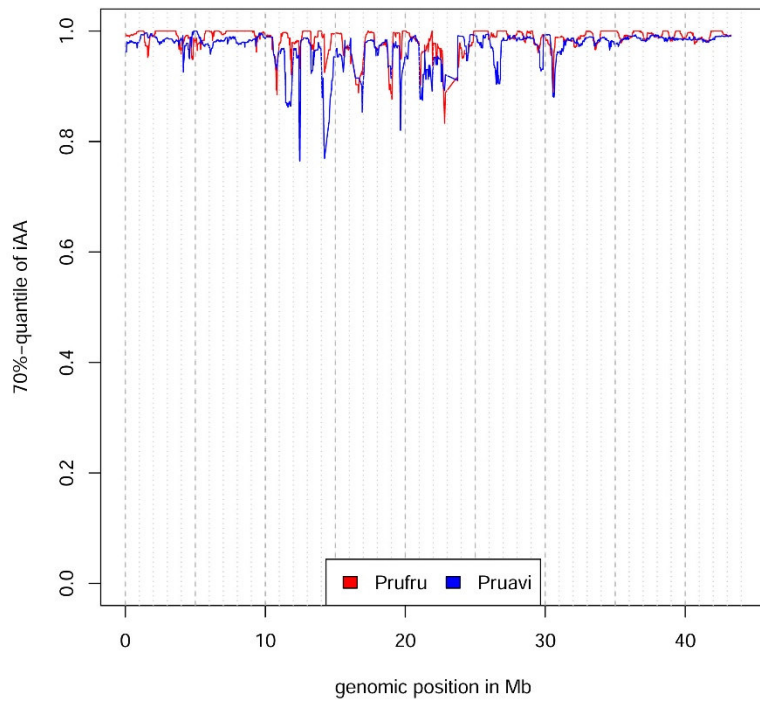

**PCE\_Fruticosa\_Chro3**

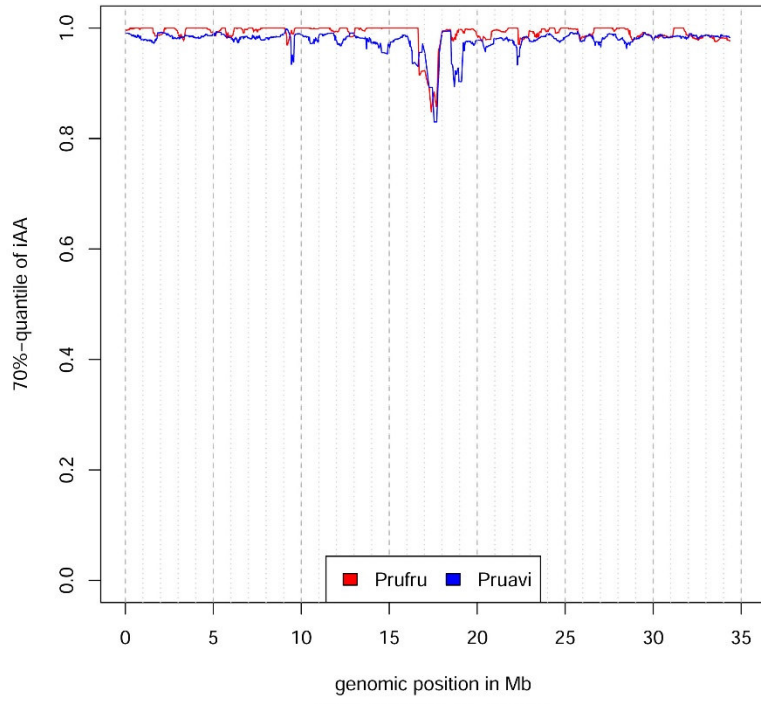

**PCE\_Fruticosa\_Chro4**

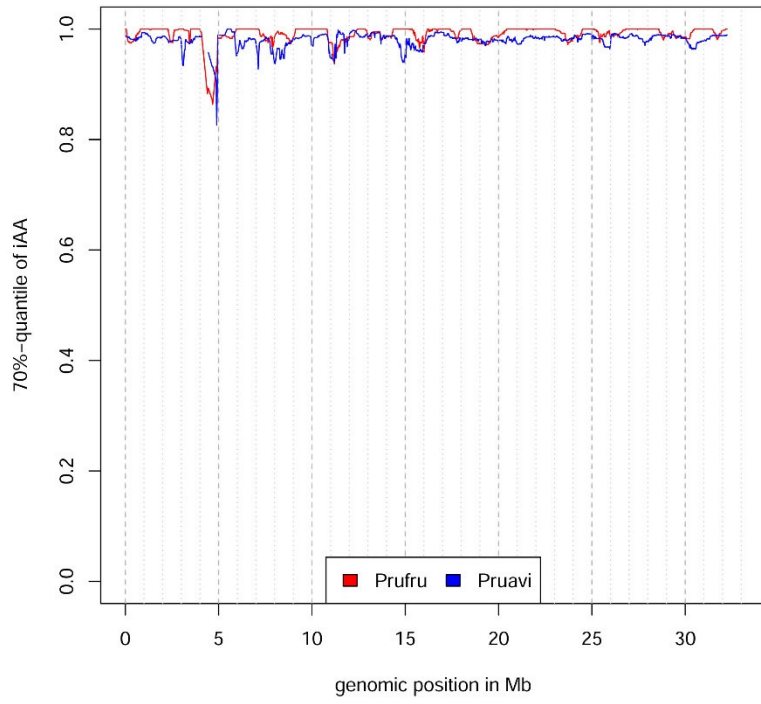

PCE\_Fruticosa\_Chro5

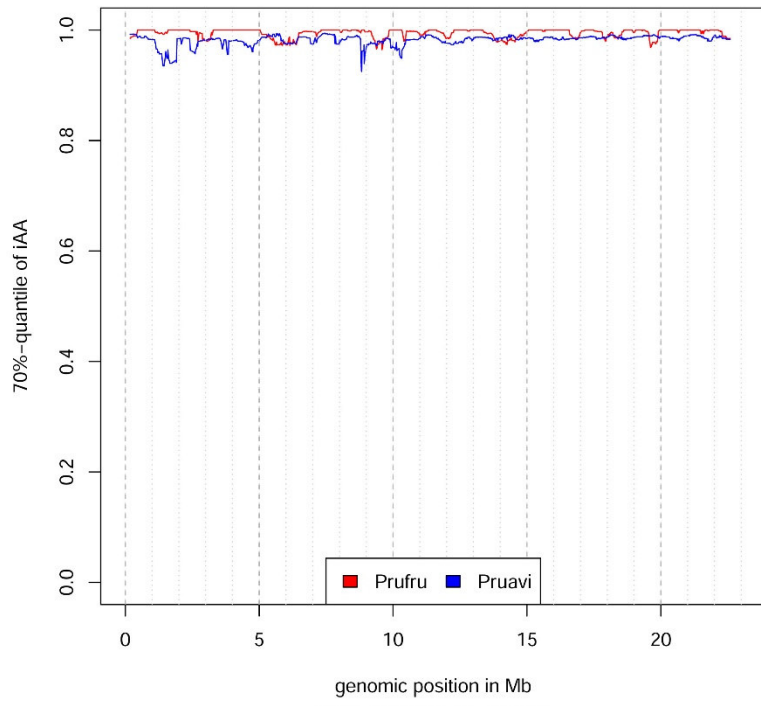

PCE\_Fruticosa\_Chro6

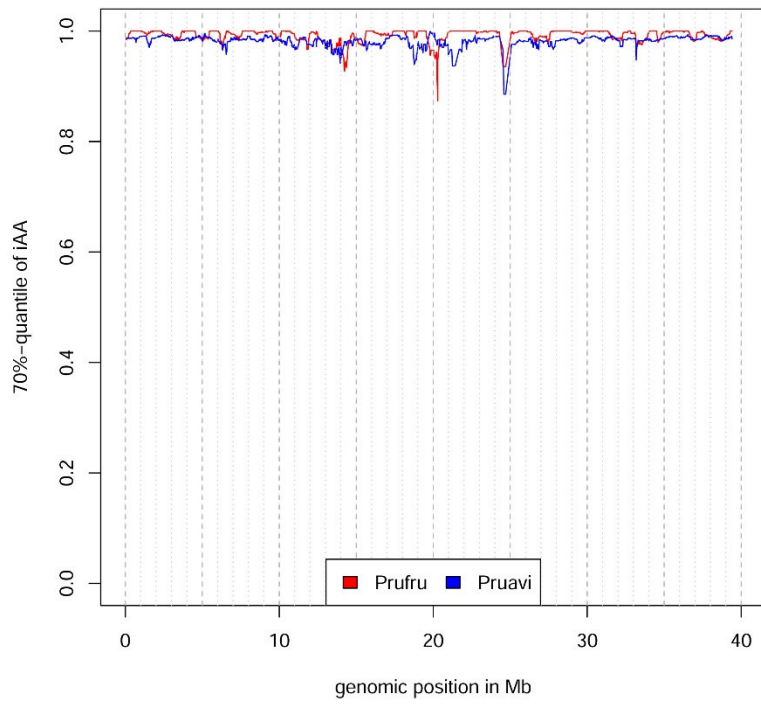

**PCE\_Fruticosa\_Chro7**

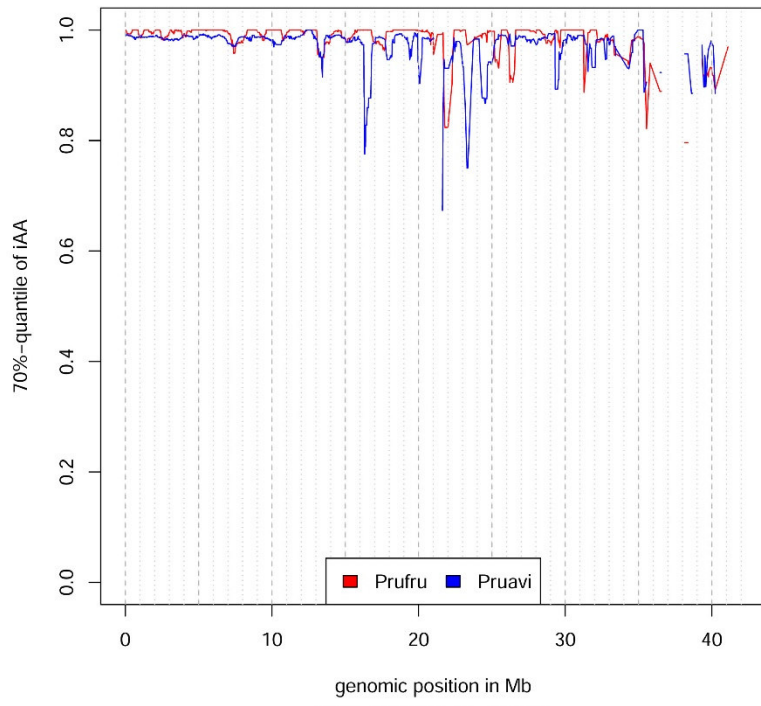

**PCE\_Fruticosa\_Chro8**

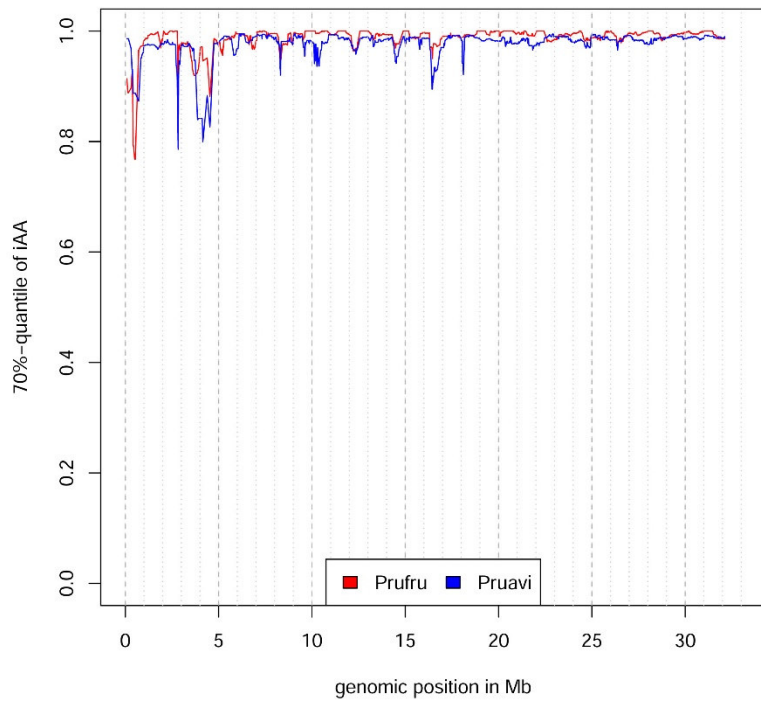

Comparison of 70%-quantile of IAA between transcripts from *P. cerasus* cv 'Schattenmorelle' assigned to *P. fruticosa* ecotype Hármashatárhegy (Prufriu, red), *P. avium* cv 'Tieton' (Pruavi, blue), *P. yedonensis* (Pyed, green), *P. domestica* (Pd, brown), *P. armeniaca* (Par, orange), *P. persica* (Pp, black), *Pyrus communis* (Pyrco, rose pink), *Populus trichocarpa* (Poptri, yellow), *Vitis vinifera* (Vv, green-blue), *Arabidopsis thaliana* (At, pink), *Malus domestica* (Md, lime pink), *Fragaria vesca* (Fraves, hot pink), *Rubus occidentalis* (Rubocc, mint-green), for each chromosome.

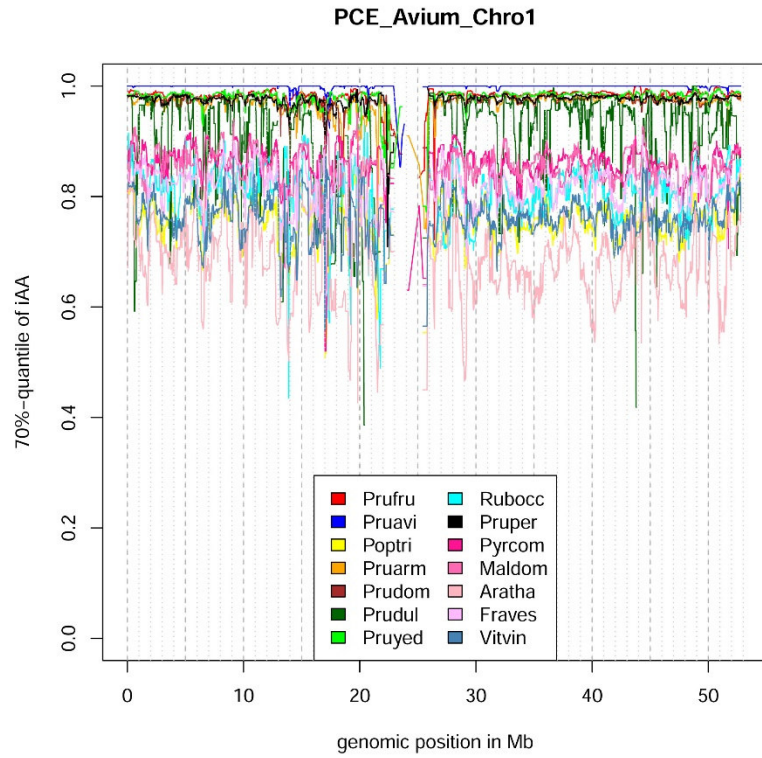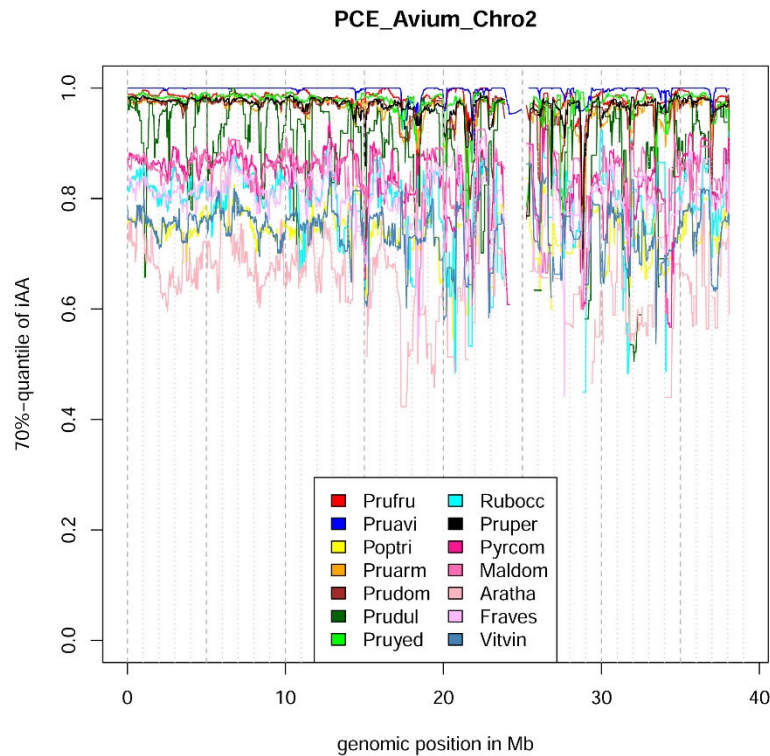



**PCE\_Avium\_Chro3**

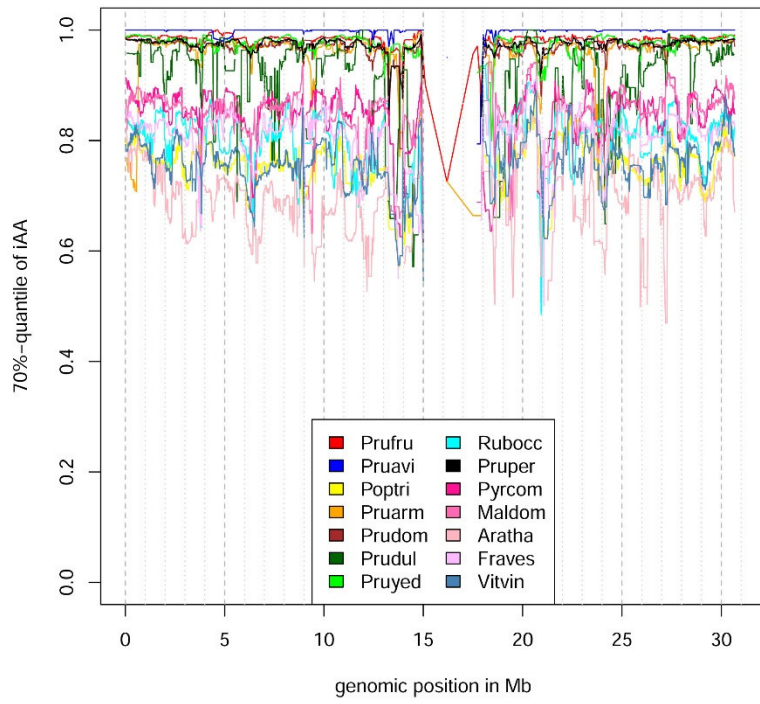

**PCE\_Avium\_Chro4**

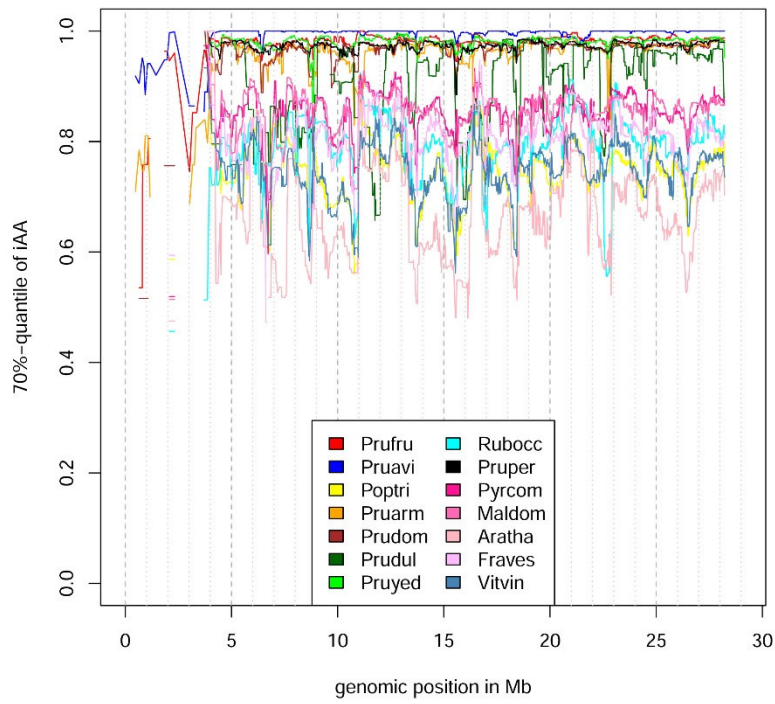

PCE\_Avium\_Chro5

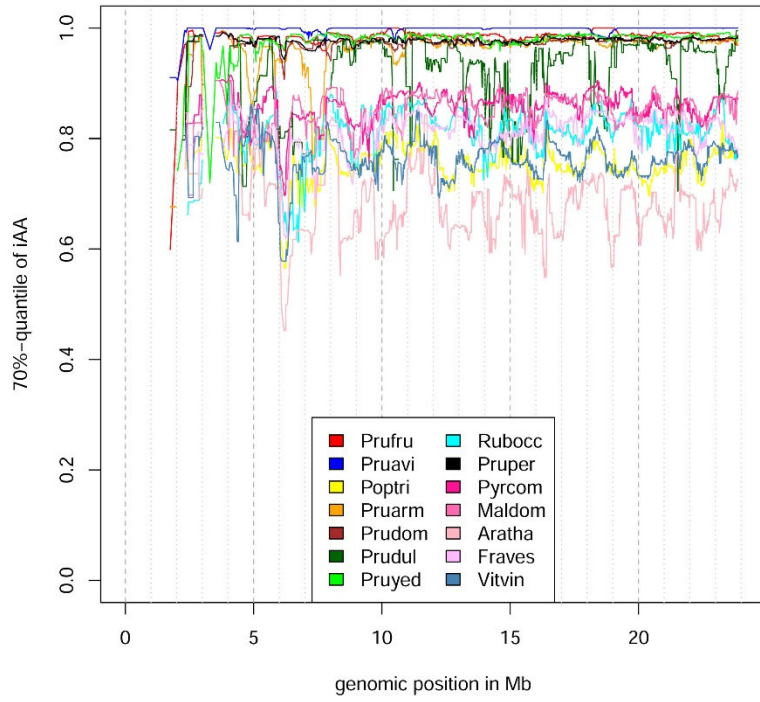

PCE\_Avium\_Chro6

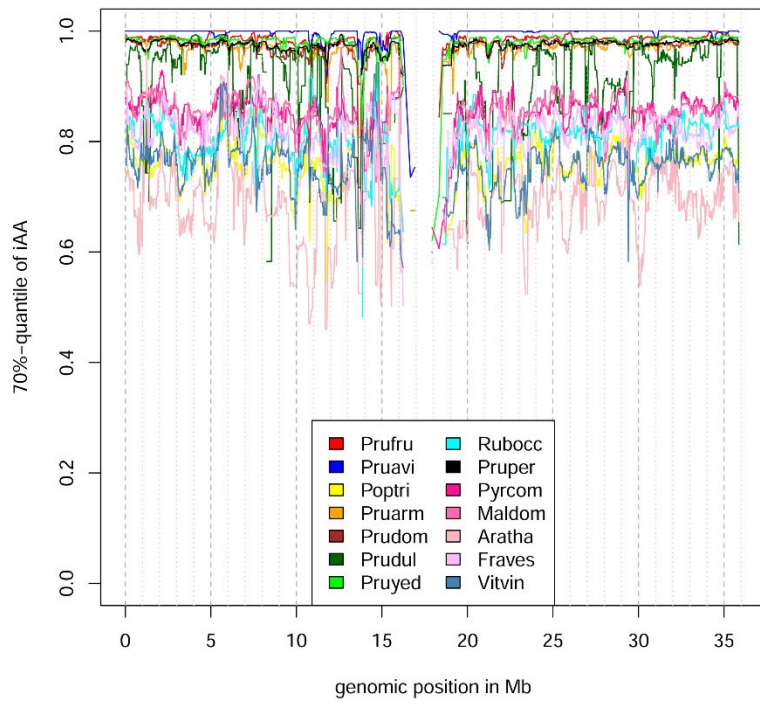

**PCE\_Avium\_Chro7**

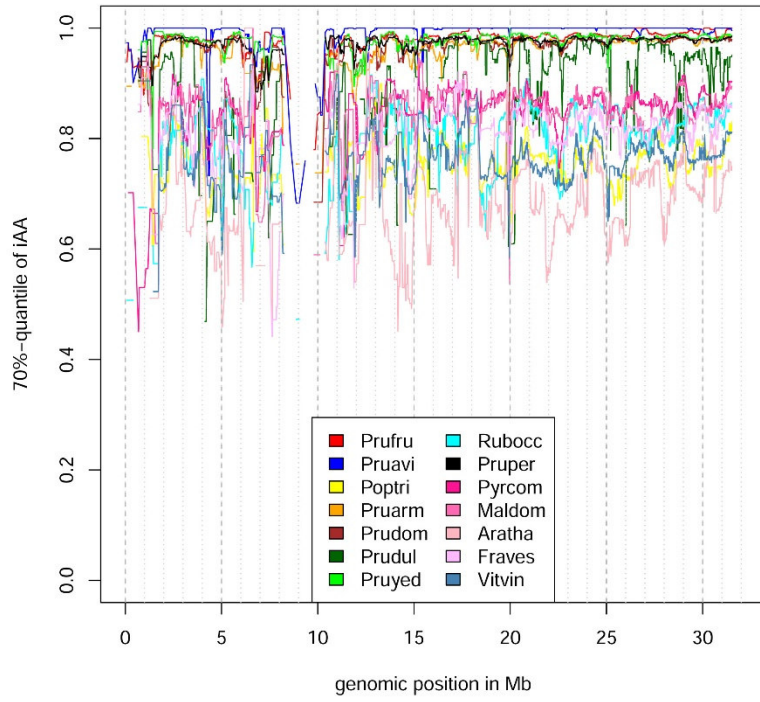

**PCE\_Avium\_Chro8**

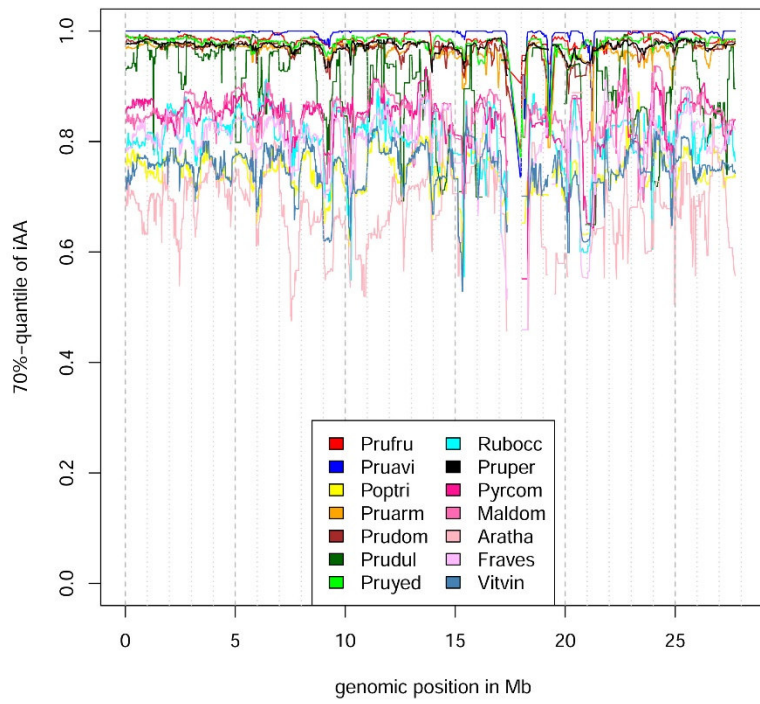

PCE\_Fruticosa\_Chro1

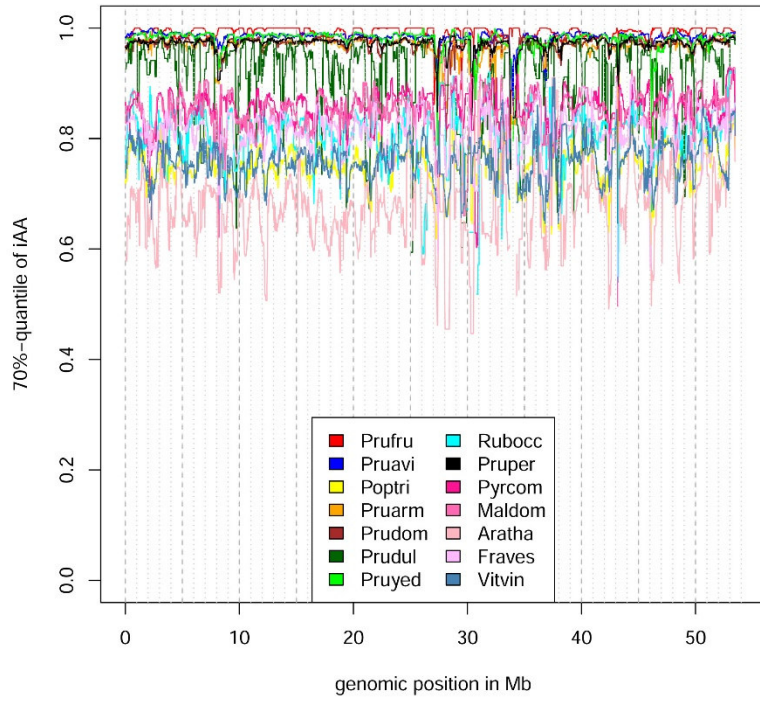

PCE\_Fruticosa\_Chro2

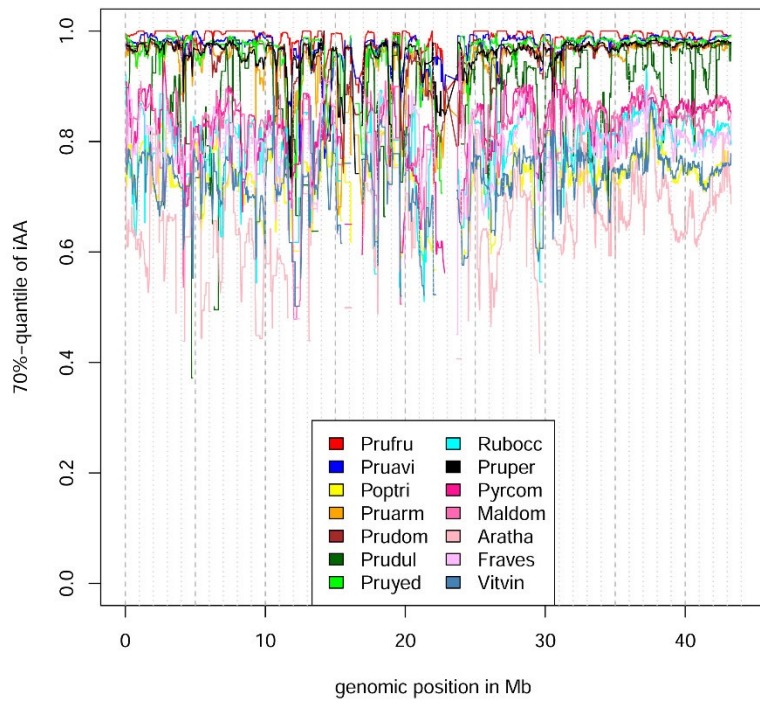

PCE\_Fruticosa\_Chro3

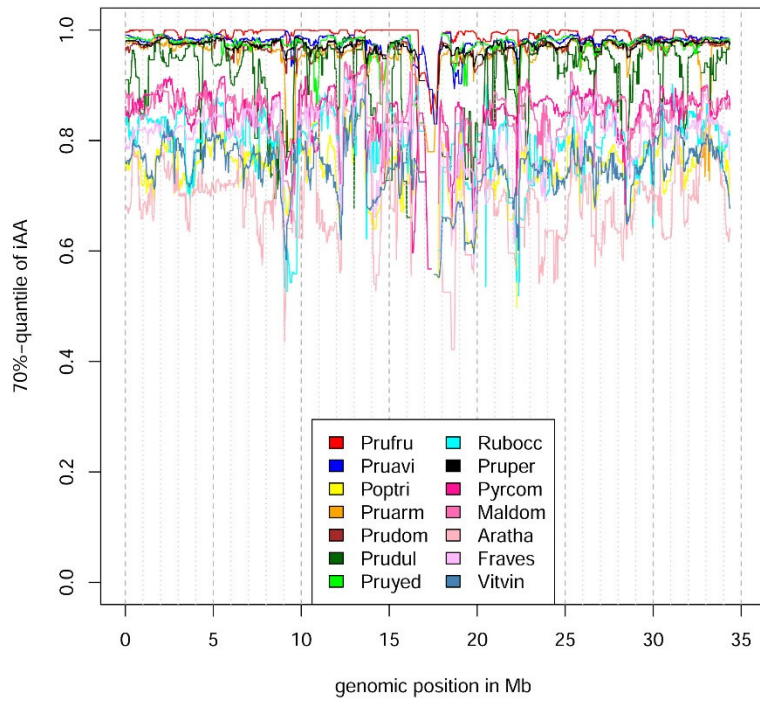

PCE\_Fruticosa\_Chro4

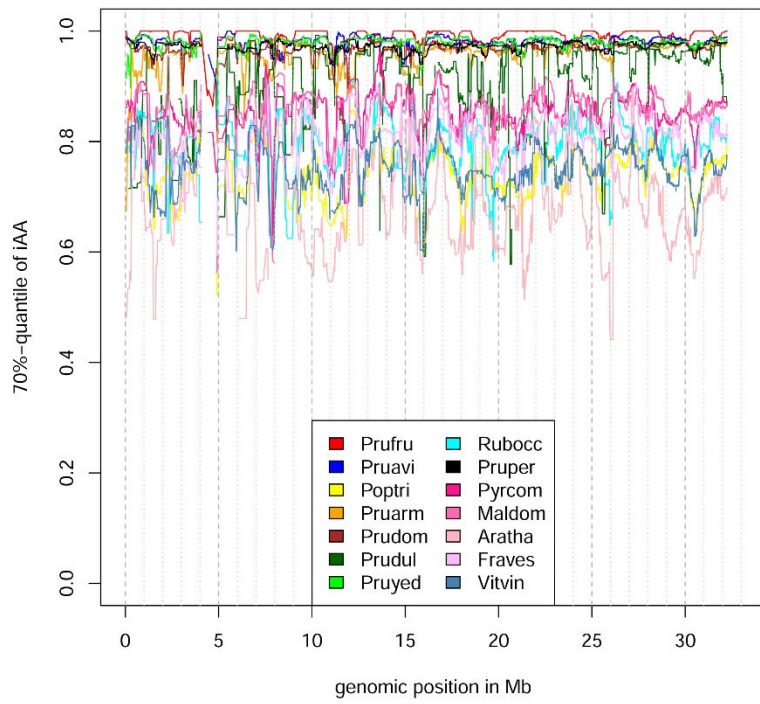

PCE\_Fruticosa\_Chro5

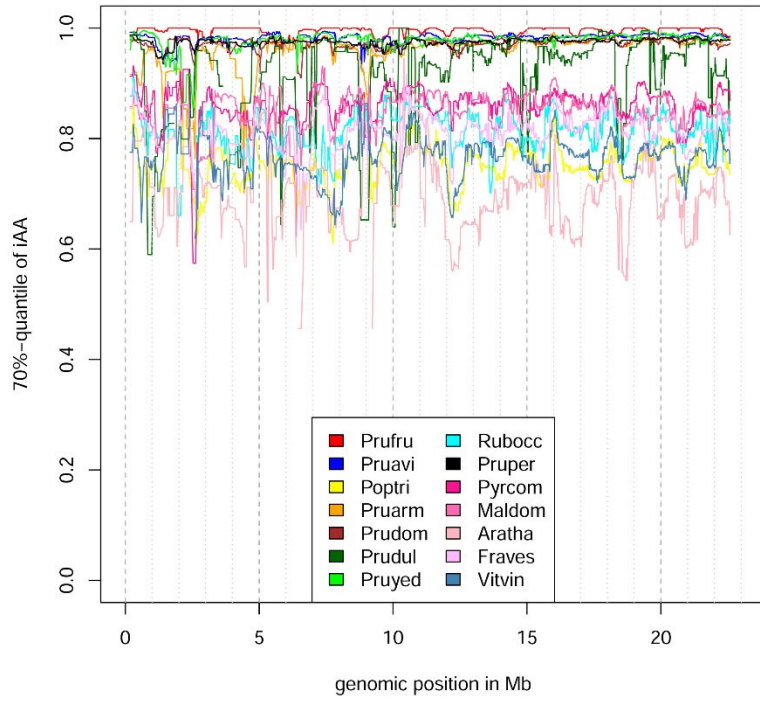

PCE\_Fruticosa\_Chro6

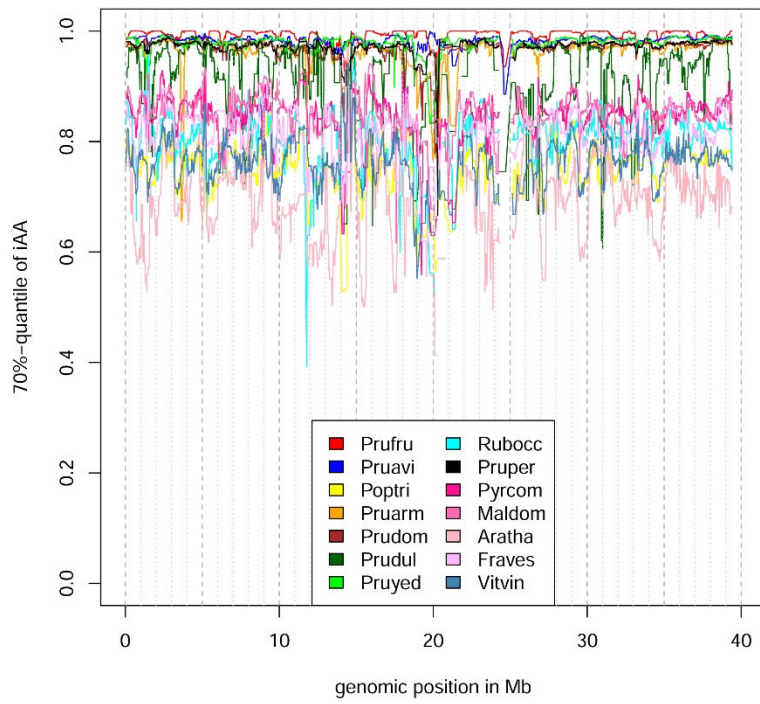

PCE\_Fruticosa\_Chro7

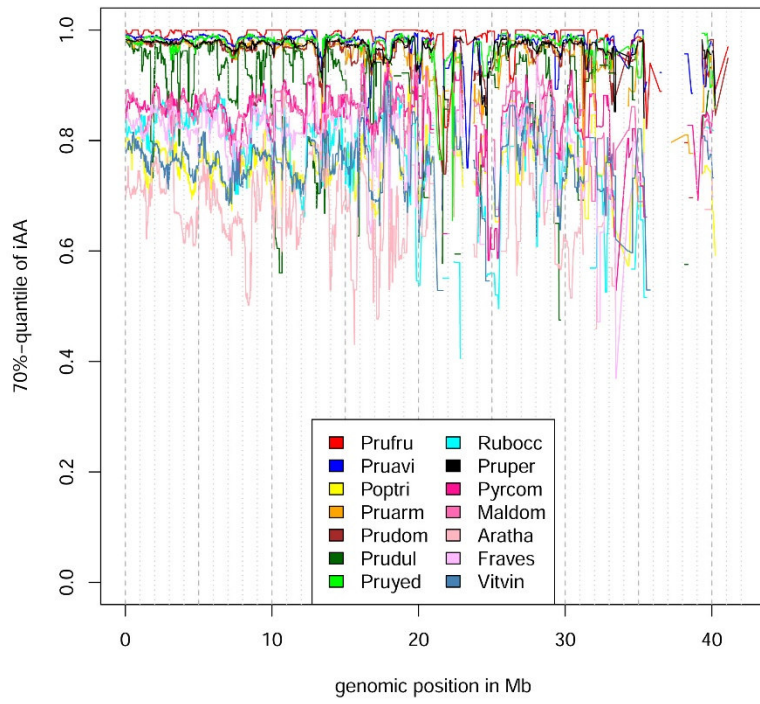

PCE\_Fruticosa\_Chro8

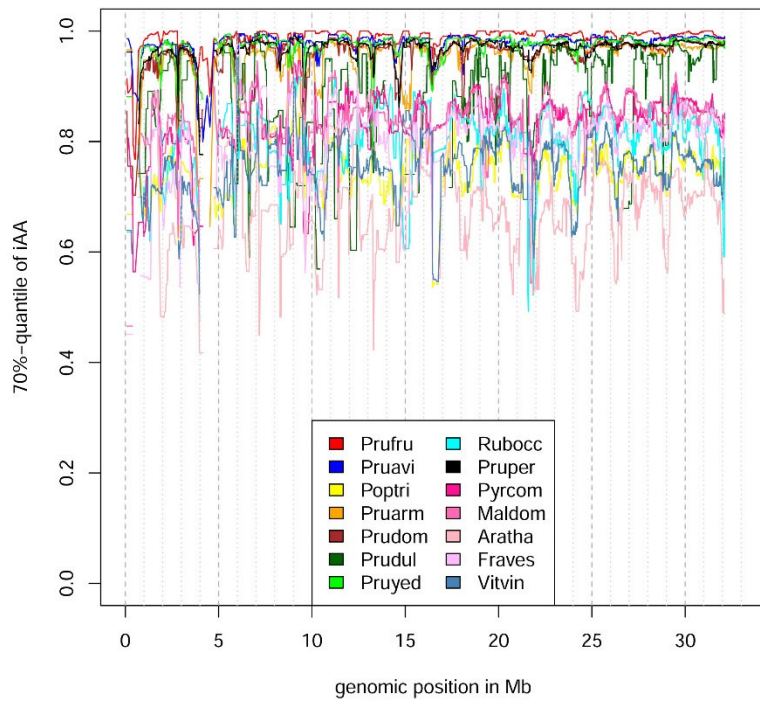

**Note S2** Calculation of %-covered bases obtained from RNAseq data.

The *Pces* genome was divided into 250k windows. The percentage of covered bases using RNAseq data of *P. canescens* (SRX14816137), *P. serrulata* (SRX14816136), *P. mahaleb* (SRX14816140), *P. pensylvanica* (SRX14816144), *P. maackii* (SRX14816139), *P. subhirtella* (SRX14816145) was estimated for each window at a depth of 1. The results were plotted with a standard script using R.

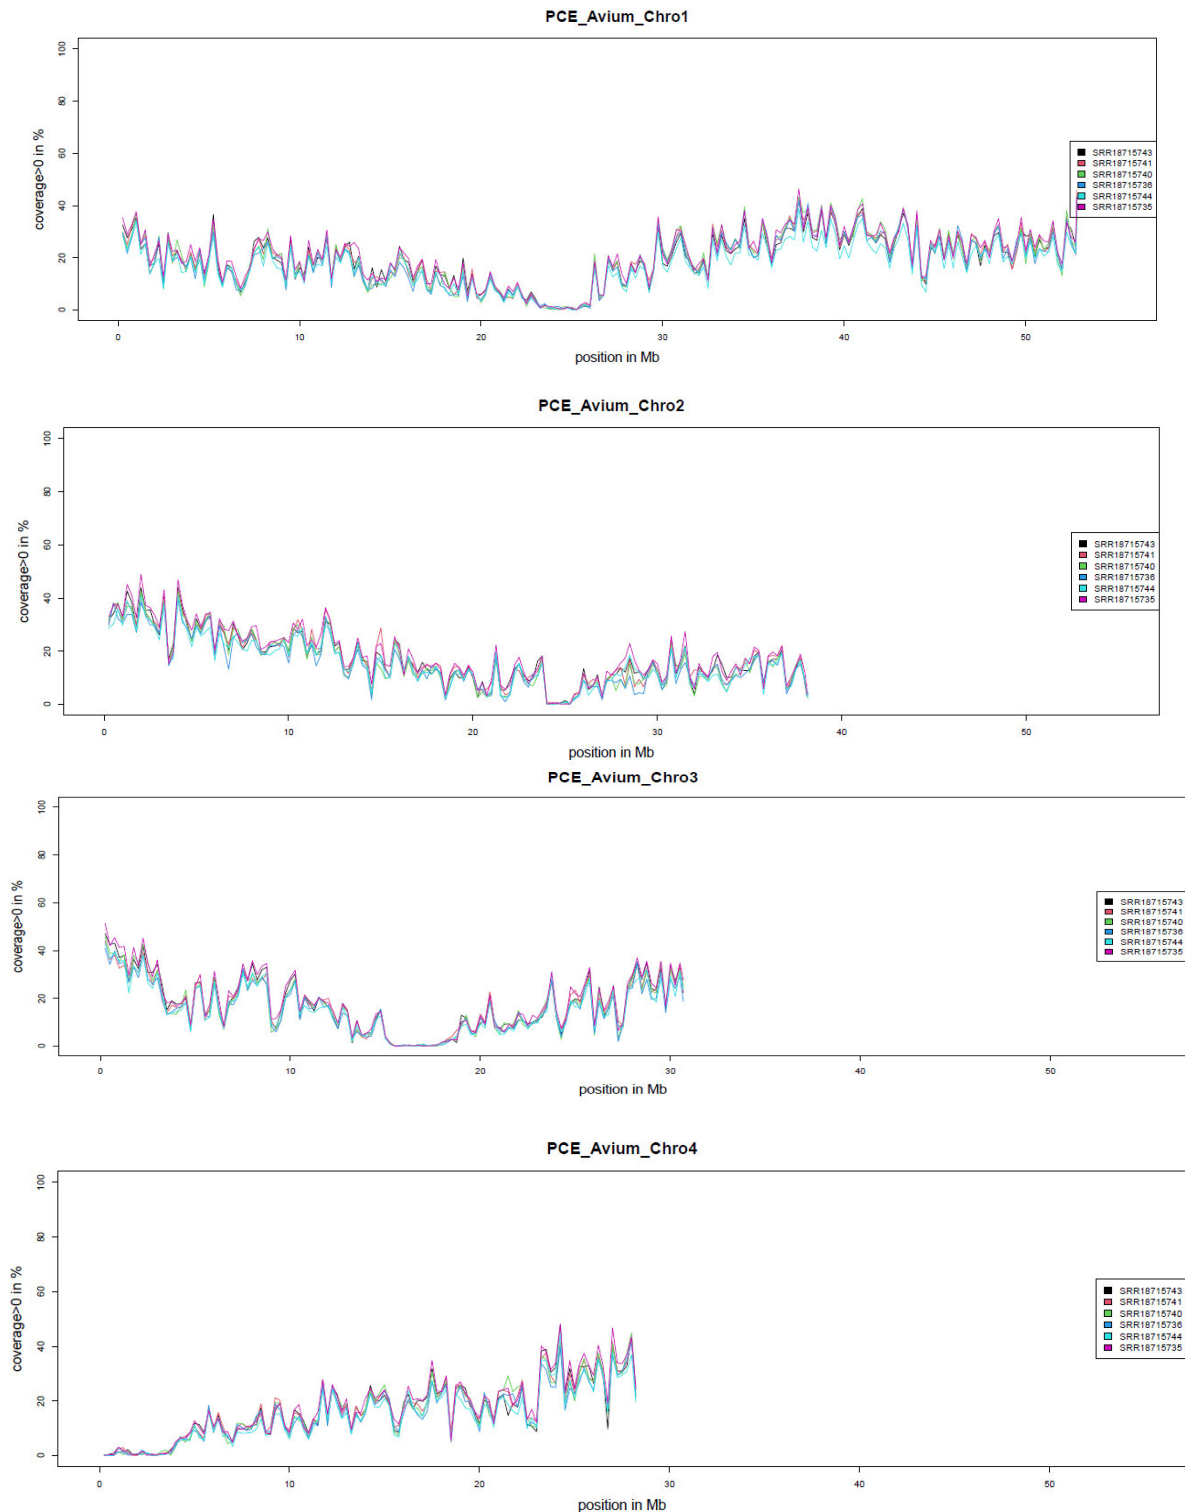



PCE\_Avium\_Chro5

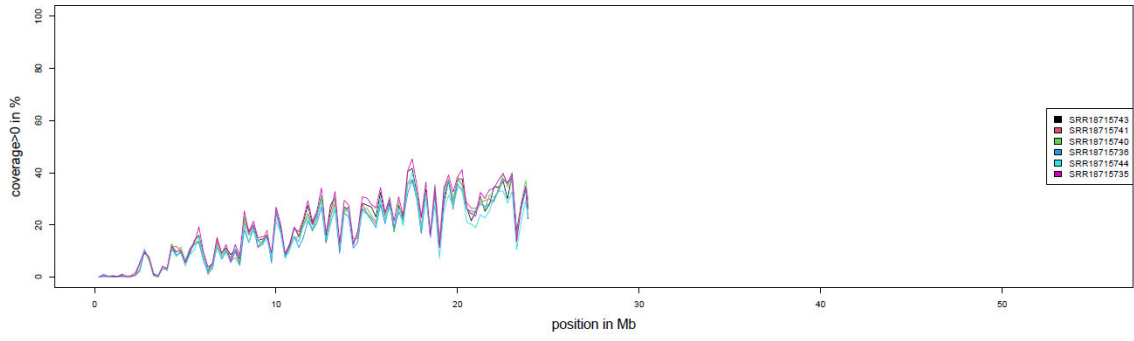

PCE\_Avium\_Chro6

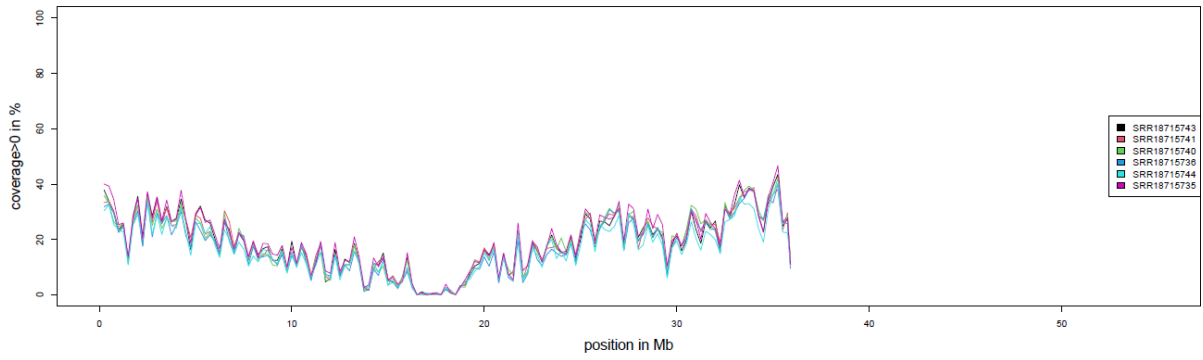

PCE\_Avium\_Chro7

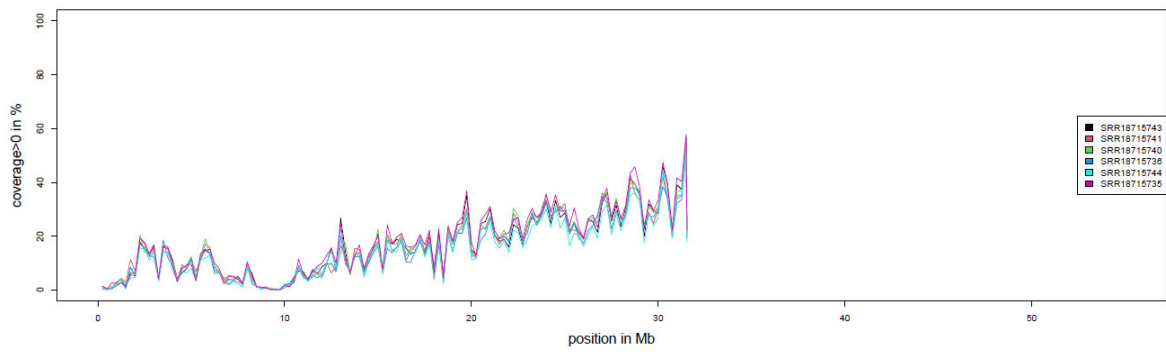

PCE\_Avium\_Chro8

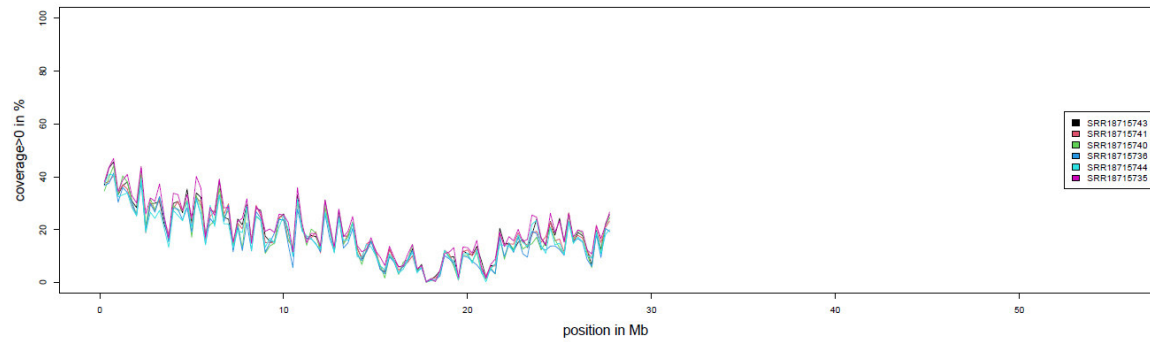

PCE\_Fruticosa\_Chro1

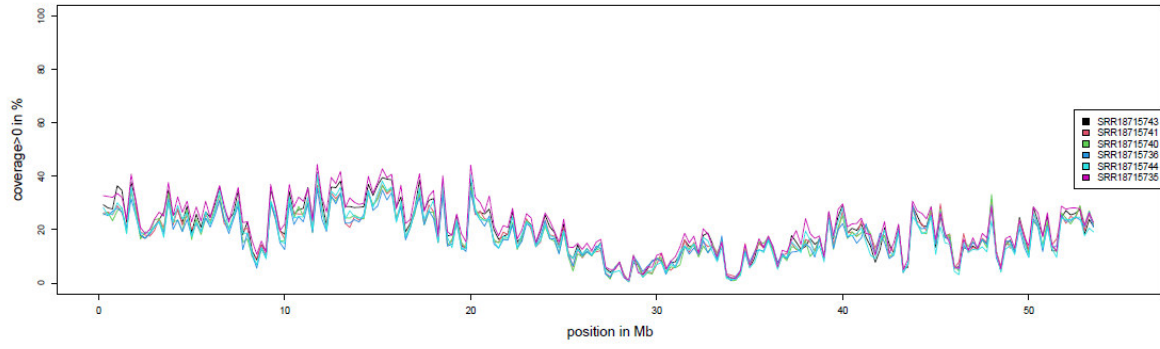

PCE\_Fruticosa\_Chro2

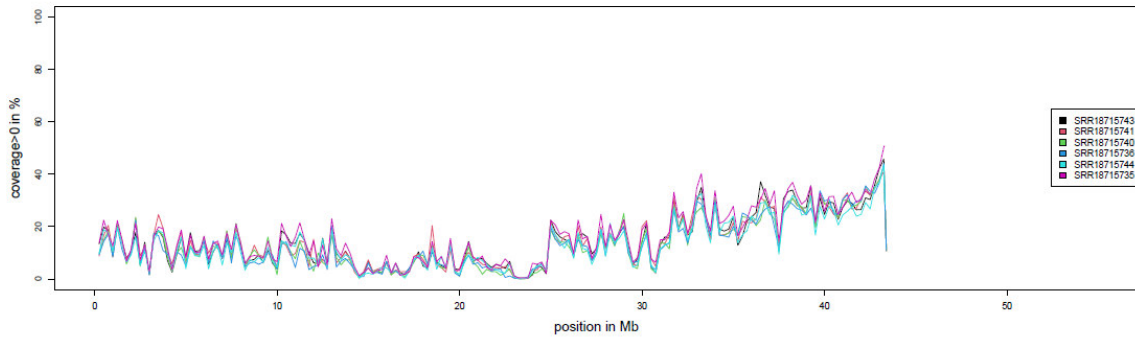

PCE\_Fruticosa\_Chro3

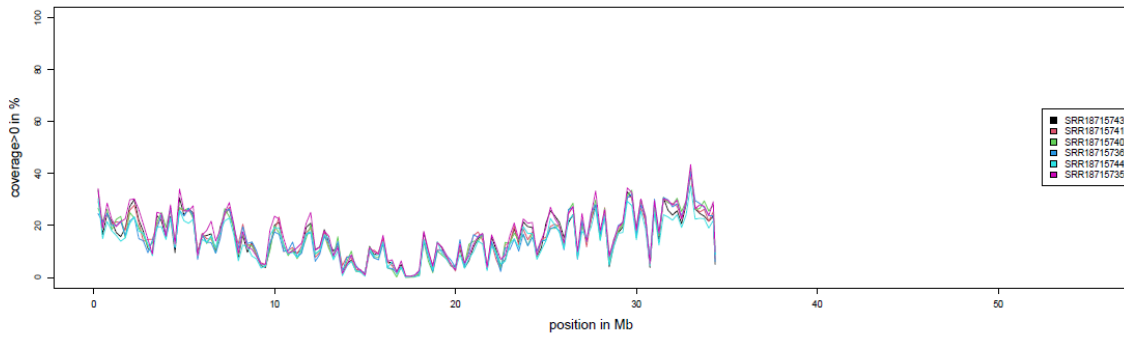

PCE\_Fruticosa\_Chro4

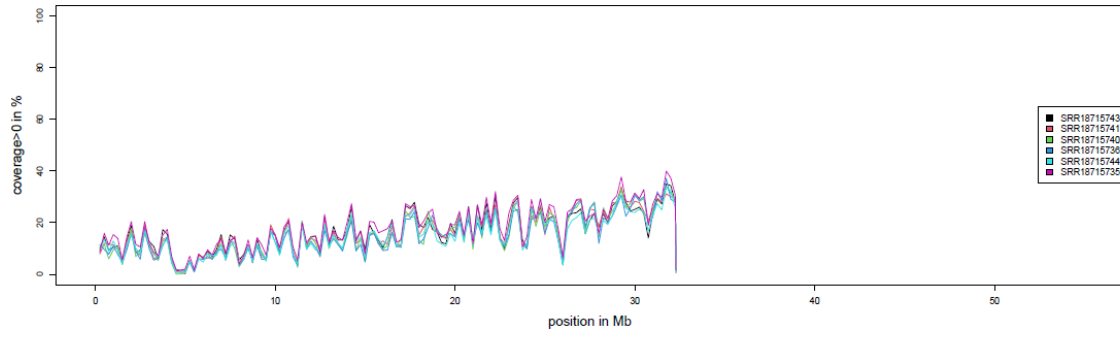

PCE\_Fruticosa\_Chro5

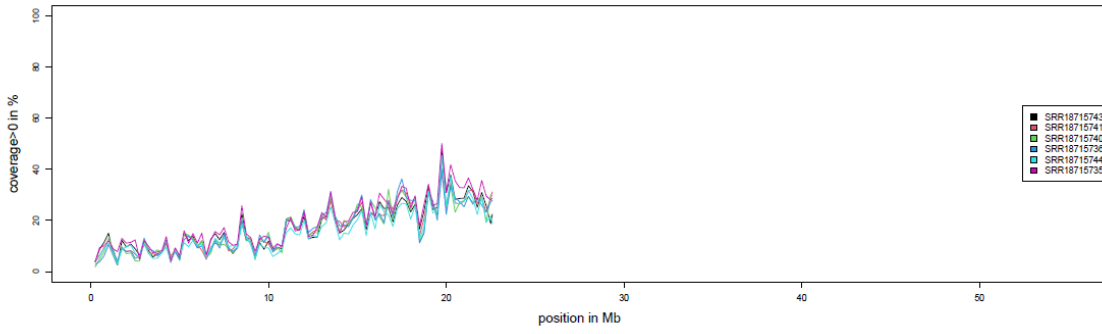

PCE\_Fruticosa\_Chro6

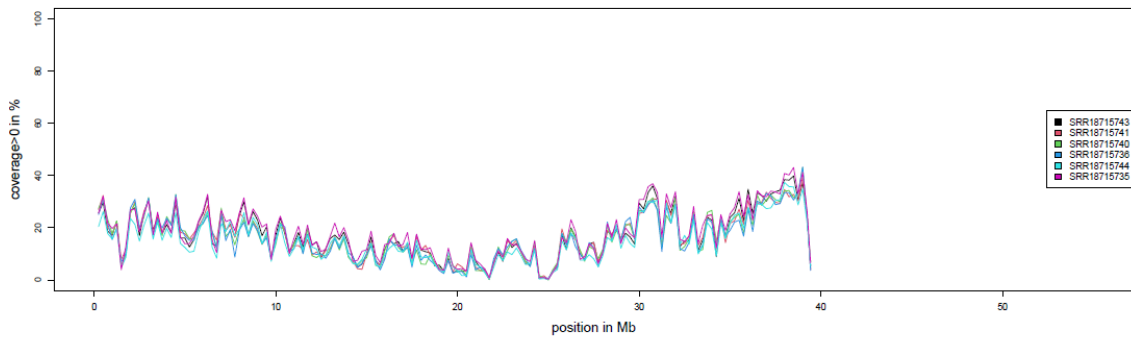

PCE\_Fruticosa\_Chro7

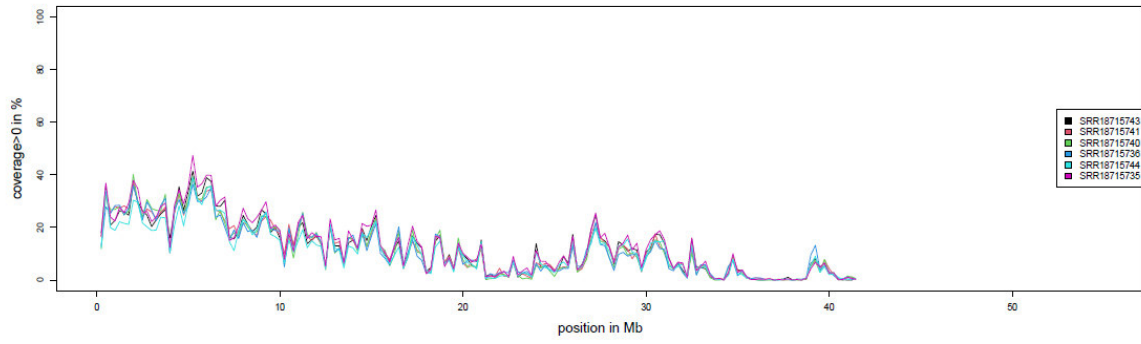

PCE\_Fruticosa\_Chro8

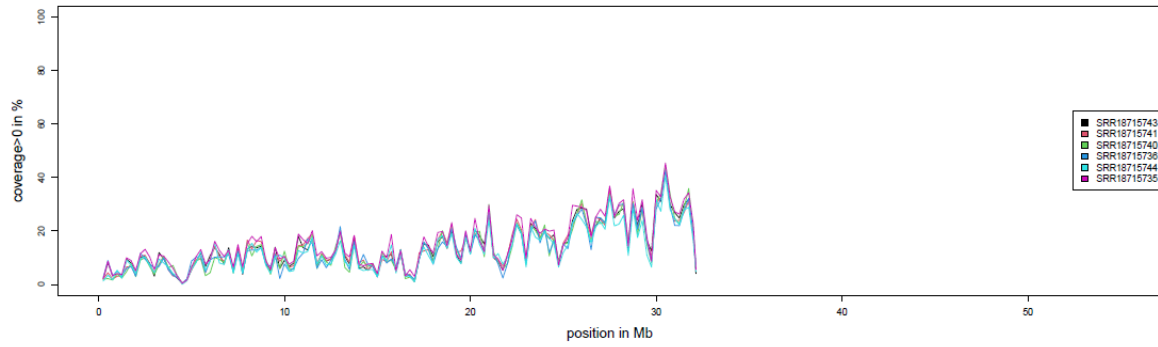

**Note S3** Access to the assembly hub for genome and annotation visualization at UCSC Genome Browser.

An assembly hub for genome and annotation visualization is permanently hosted at <http://bioinf.uni-greifswald.de/hubs/pcer/hub.txt> . To connect this assembly hub to the UCSC Genome Browser, go to <https://genome.ucsc.edu>, click on "My Data" -> "Track Hubs" -> select one of the mirrors-> "Connected Hubs" -> insert the link -> "Add Hub".

**Note S4** Mummer plot between the genome sequence of *P. cerasus* 'Schattenmorelle' (this study) and 'Monmorency' (Goeckeritz et al. 2023). *Pces\_a* – subgenome *P. avium* from 'Schattenmorelle', *Pces\_f* – subgenome *P. fruticosa* from 'Schattenmorelle', *PceM\_B* – subgenome *P. avium* from 'Montmorency', *PceM\_A* – subgenome *P. fruticosa* from 'Montmorency' haplotype 1, *PceM\_A\_\_* – subgenome *P. fruticosa* from 'Montmorency' haplotype 2.

Chr 1

Chr 2

Chr 3

Chr 4

Chr 5

Chr 6

Chr 7

Chr 8

PceM\_a

PceM\_f

PceM\_f'

PceS\_a

PceS\_f

PceS\_f

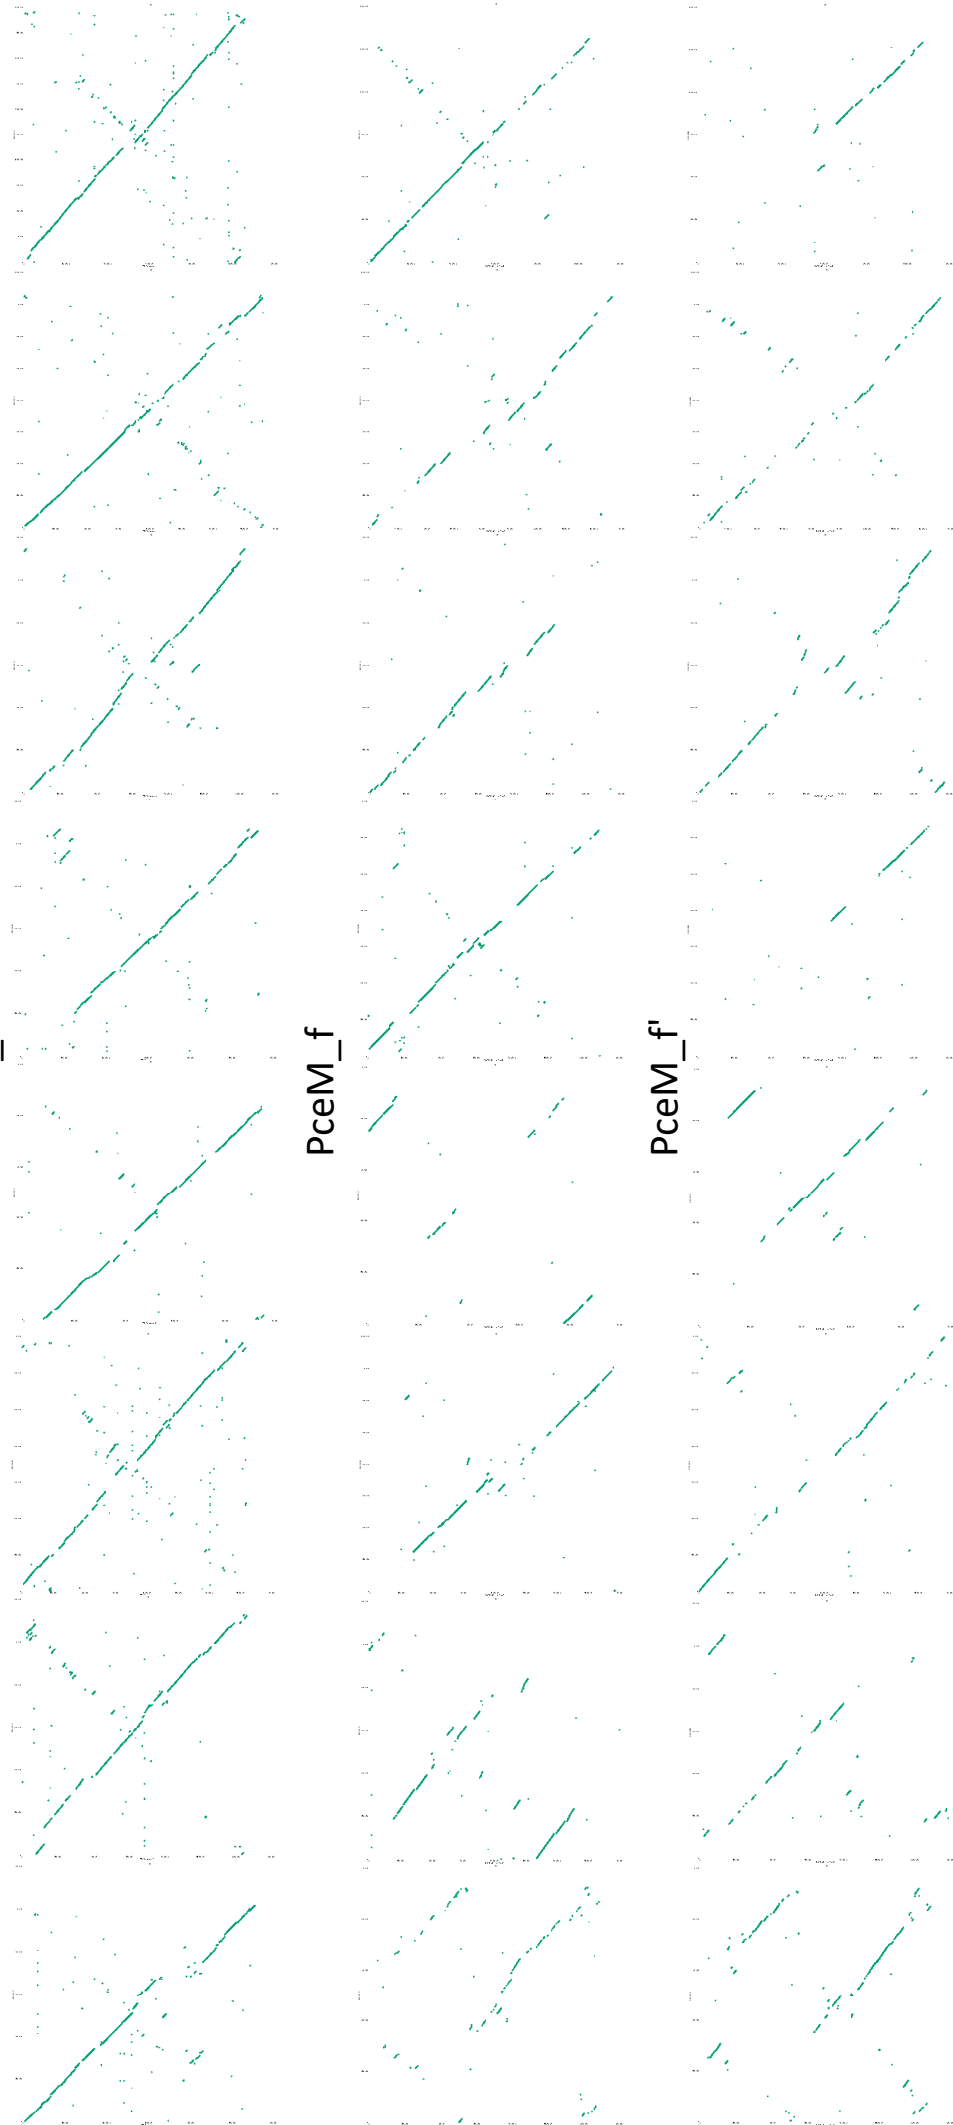

Supplement: DataSheet_1.pdf [file DataSheet_1.pdf]
