# Supplementary material for: The structure of the tetraploid sour cherry ‘Schattenmorelle’ (Prunus cerasus L.) genome reveals insights into its segmental allopolyploid nature
Source: Front Plant Sci. 2023 Dec 1;14:1284478. doi: 10.3389/fpls.2023.1284478 (PMC10722297; doi:10.3389/fpls.2023.1284478)
Supplement: Supplementary file 2 [file DataSheet_2.xlsx]

## Sheet: Note S5
Note S5 BUSCO comparisons between and within the subgenomes of P. cerasus 'Schattenmorelle' (this study) and 'Montmorency' (Goeckeritz et al. 2023), P. avium 'Tieton' (Wang et al. 2020) and P. fruticosa 'Hármashatárhegy' (Wöhner et al. 2020).

## Sheet: A
Which Buscos are present in one subgenome, but not yet in the other one?
PceS_a & PceM_B with PceS_f and PceM_A or PceM_A__
BUSCOS
(%)	2.41636	4.33705	4.83271	6.38166	3.5316	2.72615
No.	39	70	78	103	57	44
Dataset	PceS_a miss with Pce_f present	PceS_f miss with Pce_a present	PceM_B miss with PceM_A present	PceM_B miss with PceM_A__ present	PceM_A miss with PceM_B present	PceM_A__ miss with PceM_B present
	101442at3193	102127at3193	938at3193	23at3193	100769at3193	105366at3193
	10362at3193	108895at3193	103418at3193	103418at3193	101630at3193	108895at3193
	109341at3193	110122at3193	105380at3193	105380at3193	102703at3193	118287at3193
	11532at3193	117788at3193	109341at3193	105656at3193	106160at3193	120194at3193
	115377at3193	117882at3193	112291at3193	109341at3193	115537at3193	121132at3193
	117321at3193	118755at3193	115901at3193	112291at3193	120730at3193	126310at3193
	118094at3193	121964at3193	117072at3193	115901at3193	124441at3193	132099at3193
	121345at3193	122450at3193	119120at3193	117072at3193	127316at3193	134953at3193
	128799at3193	127216at3193	12298at3193	119120at3193	138397at3193	138857at3193
	13163at3193	128674at3193	123400at3193	122548at3193	138708at3193	151619at3193
	139085at3193	13495at3193	126918at3193	12298at3193	138922at3193	155495at3193
	14087at3193	138284at3193	12893at3193	123400at3193	14127at3193	157013at3193
	149671at3193	139380at3193	12903at3193	124686at3193	141280at3193	161671at3193
	150694at3193	14127at3193	132092at3193	125543at3193	157970at3193	163383at3193
	154694at3193	141280at3193	134017at3193	126918at3193	159603at3193	166649at3193
	157529at3193	145105at3193	134035at3193	12893at3193	163383at3193	17159at3193
	159883at3193	146234at3193	135819at3193	12903at3193	163507at3193	171623at3193
	175168at3193	151948at3193	137468at3193	132092at3193	171230at3193	175219at3193
	177100at3193	153174at3193	137698at3193	1332at3193	17159at3193	176806at3193
	18305at3193	157608at3193	137933at3193	134017at3193	171623at3193	178434at3193
	18641at3193	157980at3193	138284at3193	134035at3193	175219at3193	18255at3193
	1914at3193	163007at3193	143219at3193	134878at3193	180244at3193	18435at3193
	205334at3193	165240at3193	144454at3193	135819at3193	181042at3193	191077at3193
	210791at3193	17535at3193	146428at3193	137468at3193	18334at3193	200083at3193
	23at3193	177680at3193	150771at3193	137698at3193	18435at3193	209041at3193
	25450at3193	178774at3193	151491at3193	137933at3193	187952at3193	24102at3193
	28384at3193	180615at3193	151948at3193	138284at3193	188221at3193	25169at3193
	30065at3193	180839at3193	152725at3193	13979at3193	18970at3193	25353at3193
	41334at3193	181042at3193	15318at3193	139843at3193	191077at3193	27702at3193
	43206at3193	183573at3193	156739at3193	143219at3193	196323at3193	33440at3193
	54563at3193	193252at3193	159297at3193	1440at3193	196423at3193	41955at3193
	54569at3193	19370at3193	160405at3193	144454at3193	2050at3193	42058at3193
	5761at3193	196453at3193	161520at3193	146428at3193	205334at3193	4349at3193
	59251at3193	19854at3193	163589at3193	150771at3193	23608at3193	5135at3193
	59331at3193	19858at3193	165314at3193	150871at3193	24102at3193	53741at3193
	78556at3193	20132at3193	166295at3193	151491at3193	25169at3193	5at3193
	88005at3193	206508at3193	1664at3193	152725at3193	25760at3193	62306at3193
	90343at3193	209041at3193	169146at3193	15318at3193	31559at3193	69965at3193
	98055at3193	210541at3193	173413at3193	156739at3193	32854at3193	79at3193
		216839at3193	177759at3193	159297at3193	3935at3193	84405at3193
		22723at3193	180289at3193	160405at3193	42058at3193	86302at3193
		2325at3193	18641at3193	161520at3193	42368at3193	88591at3193
		241at3193	187345at3193	165512at3193	44042at3193	91508at3193
		25760at3193	193252at3193	166295at3193	469at3193	94986at3193
		26756at3193	19854at3193	1664at3193	54858at3193
		2694at3193	199345at3193	167808at3193	59251at3193
		27810at3193	199467at3193	169146at3193	59331at3193
		34445at3193	202942at3193	176874at3193	62306at3193
		36488at3193	212874at3193	177502at3193	67617at3193
		38669at3193	214134at3193	177759at3193	69936at3193
		43587at3193	23203at3193	180289at3193	78898at3193
		47754at3193	26756at3193	18641at3193	89010at3193
		4892at3193	26776at3193	187345at3193	90343at3193
		51348at3193	29083at3193	187746at3193	90464at3193
		51868at3193	30814at3193	19068at3193	94986at3193
		52194at3193	41344at3193	193252at3193	95481at3193
		57984at3193	42938at3193	199345at3193	96694at3193
		58217at3193	43206at3193	199467at3193
		69954at3193	52497at3193	202147at3193
		7552at3193	52897at3193	202942at3193
		77167at3193	57296at3193	204197at3193
		79579at3193	57372at3193	214134at3193
		79662at3193	57821at3193	23203at3193
		81321at3193	63156at3193	26756at3193
		82758at3193	6412at3193	26776at3193
		85331at3193	71815at3193	29083at3193
		91508at3193	75037at3193	3082at3193
		92112at3193	77626at3193	4051at3193
		95793at3193	81321at3193	41007at3193
		96192at3193	81710at3193	41344at3193
			82631at3193	42938at3193
			82968at3193	43206at3193
			87393at3193	45207at3193
			87440at3193	47494at3193
			89076at3193	52497at3193
			89100at3193	52897at3193
			97239at3193	56338at3193
			9734at3193	57296at3193
				57372at3193
				57821at3193
				61358at3193
				63156at3193
				6412at3193
				71522at3193
				71815at3193
				75037at3193
				77626at3193
				81321at3193
				81710at3193
				82631at3193
				82968at3193
				87393at3193
				87440at3193
				89076at3193
				89100at3193
				91220at3193
				92659at3193
				938at3193
				95104at3193
				95831at3193
				96092at3193
				97239at3193
				9734at3193

## Sheet: B
Which BUSCOS got lost in _avium subgenome of PceM and PceS, and in subgenome PceS_f / PceM_A or A__
(%)	0.743494	0.557621	0.557621
No.	12	9	9
Dataset	PceS_a miss with PceM_B miss	PceS_f miss with PceM_A miss	PceS_f miss with PceM_A__ miss
	23at3193	124686at3193	108895at3193
	103418at3193	130994at3193	130994at3193
	109341at3193	14127at3193	151948at3193
	124686at3193	141280at3193	155352at3193
	130994at3193	155352at3193	179931at3193
	150694at3193	179931at3193	19854at3193
	155352at3193	181042at3193	209041at3193
	157529at3193	25760at3193	91508at3193
	179931at3193	94908at3193	94908at3193
	18641at3193
	43206at3193
	94908at3193

## Sheet: C
Which Buscos got lost in Pce but still occur in PaT or PfeH?
(%)	2.23048	4.21314	6.93928	5.70012	4.21314
No.	36	68	112	92	68
Dataset	PceS_a miss with PaT present	PceS_f miss with PfeH present	PceM_B miss with PaT present	PceM_A miss with Pfeh present	PceM_A__ miss with Pfeh present
	101442at3193	102127at3193	105380at3193	100769at3193	102127at3193
	10362at3193	103418at3193	105656at3193	102703at3193	103418at3193
	109341at3193	108895at3193	109341at3193	105656at3193	108895at3193
	11532at3193	110122at3193	112291at3193	106160at3193	110122at3193
	115377at3193	117788at3193	115901at3193	115537at3193	117788at3193
	117321at3193	117882at3193	117072at3193	120730at3193	117882at3193
	118094at3193	118755at3193	119120at3193	122548at3193	118755at3193
	121345at3193	121964at3193	122548at3193	124441at3193	121964at3193
	128799at3193	122450at3193	12298at3193	124686at3193	122450at3193
	13163at3193	124686at3193	123400at3193	125543at3193	124686at3193
	139085at3193	127216at3193	125543at3193	127316at3193	127216at3193
	149671at3193	128674at3193	126918at3193	127800at3193	128674at3193
	154694at3193	13495at3193	127800at3193	1332at3193	13495at3193
	159883at3193	138284at3193	12893at3193	134878at3193	138284at3193
	175168at3193	139380at3193	12903at3193	138397at3193	139380at3193
	177100at3193	14127at3193	132092at3193	138708at3193	14127at3193
	18305at3193	141280at3193	1332at3193	138922at3193	141280at3193
	18641at3193	146234at3193	134017at3193	13979at3193	146234at3193
	1914at3193	153174at3193	134035at3193	139843at3193	153174at3193
	205334at3193	157608at3193	134878at3193	14127at3193	157608at3193
	210791at3193	157980at3193	135819at3193	141280at3193	157980at3193
	23at3193	163007at3193	137468at3193	1440at3193	163007at3193
	25450at3193	165240at3193	137698at3193	147098at3193	165240at3193
	28384at3193	17535at3193	137933at3193	150871at3193	17535at3193
	30065at3193	178774at3193	138284at3193	157970at3193	178774at3193
	41334at3193	180615at3193	13979at3193	159603at3193	180615at3193
	54563at3193	180839at3193	139843at3193	163383at3193	180839at3193
	54569at3193	183573at3193	143219at3193	163507at3193	183573at3193
	5761at3193	193252at3193	1440at3193	165512at3193	193252at3193
	59251at3193	19370at3193	144454at3193	167808at3193	19370at3193
	59331at3193	196453at3193	146428at3193	171230at3193	196453at3193
	70143at3193	19854at3193	147098at3193	17159at3193	19854at3193
	78556at3193	19858at3193	150771at3193	171623at3193	19858at3193
	88005at3193	20132at3193	150871at3193	175219at3193	20132at3193
	90343at3193	206508at3193	151491at3193	176874at3193	206508at3193
	98055at3193	210541at3193	151948at3193	177502at3193	210541at3193
		216839at3193	152725at3193	180244at3193	216839at3193
		22723at3193	15318at3193	18334at3193	22723at3193
		2325at3193	156739at3193	18435at3193	2325at3193
		241at3193	159297at3193	187746at3193	241at3193
		25760at3193	160405at3193	187952at3193	25760at3193
		26756at3193	161520at3193	188221at3193	26756at3193
		2694at3193	163589at3193	189672at3193	2694at3193
		27810at3193	165314at3193	18970at3193	27810at3193
		34445at3193	165512at3193	19068at3193	34445at3193
		36488at3193	166295at3193	191077at3193	36488at3193
		38669at3193	1664at3193	196323at3193	38669at3193
		43587at3193	167808at3193	196423at3193	43587at3193
		47754at3193	169146at3193	202147at3193	47754at3193
		4892at3193	173413at3193	204197at3193	4892at3193
		51348at3193	176874at3193	2050at3193	51348at3193
		51868at3193	177502at3193	205334at3193	51868at3193
		52194at3193	177759at3193	23608at3193	52194at3193
		57984at3193	180289at3193	23870at3193	57984at3193
		58217at3193	18641at3193	24102at3193	58217at3193
		69954at3193	187345at3193	25169at3193	69954at3193
		70143at3193	187746at3193	25760at3193	70143at3193
		7552at3193	189672at3193	28151at3193	7552at3193
		77167at3193	19068at3193	3082at3193	77167at3193
		79579at3193	193252at3193	31559at3193	79579at3193
		79662at3193	19854at3193	32854at3193	79662at3193
		81321at3193	199345at3193	3935at3193	81321at3193
		82758at3193	199467at3193	4051at3193	82758at3193
		85331at3193	202147at3193	41007at3193	85331at3193
		91508at3193	202942at3193	42058at3193	91508at3193
		92112at3193	204197at3193	42368at3193	92112at3193
		95793at3193	212874at3193	44042at3193	95793at3193
		96192at3193	214134at3193	45207at3193	96192at3193
			23203at3193	469at3193
			23at3193	47494at3193
			26756at3193	54858at3193
			26776at3193	56338at3193
			28151at3193	59251at3193
			29083at3193	59331at3193
			30814at3193	61358at3193
			3082at3193	62306at3193
			4051at3193	63808at3193
			41007at3193	67617at3193
			41344at3193	69936at3193
			42938at3193	71522at3193
			45207at3193	78898at3193
			47494at3193	89010at3193
			52497at3193	90343at3193
			52897at3193	90464at3193
			56338at3193	91220at3193
			57296at3193	92659at3193
			57372at3193	94986at3193
			57821at3193	95104at3193
			61358at3193	95481at3193
			63156at3193	95831at3193
			63808at3193	96092at3193
			6412at3193	96694at3193
			71522at3193
			71815at3193
			75037at3193
			77626at3193
			81321at3193
			81710at3193
			82631at3193
			82968at3193
			87393at3193
			87440at3193
			89076at3193
			89100at3193
			91220at3193
			92659at3193
			938at3193
			95104at3193
			95831at3193
			96092at3193
			97239at3193
			9734at3193
