# Supplementary material for: The structure of the tetraploid sour cherry ‘Schattenmorelle’ (Prunus cerasus L.) genome reveals insights into its segmental allopolyploid nature
Source: Front Plant Sci. 2023 Dec 1;14:1284478. doi: 10.3389/fpls.2023.1284478 (PMC10722297; doi:10.3389/fpls.2023.1284478)
Supplement: Supplementary file 3 [file DataSheet_3.xlsx]

## Sheet: Note S6
Note S6 Regions of homoelogous exchanges found in P. cerasus 'Schattenmorelle'.

## Sheet: Tabelle1
Chromosome	start	end	description	length (bp)	HE
scaffoldPCE_Avium_Chro1	471157	833868	contigPCE_Avium_Chro1_2	362712	1
scaffoldPCE_Avium_Chro1	16526793	17671867	contigPCE_Avium_Chro1_62	1145075	2
scaffoldPCE_Avium_Chro1	21701823	21970344	contigPCE_Avium_Chro1_76	268522	3
scaffoldPCE_Avium_Chro1	21970345	21970444	gap	100	3
scaffoldPCE_Avium_Chro1	21970445	22526370	contigPCE_Avium_Chro1_77	555926	3
scaffoldPCE_Avium_Chro2	18568268	18897468	contigPCE_Avium_Chro2_72	329201	4
scaffoldPCE_Avium_Chro3	4207578	4321076	contigPCE_Avium_Chro3_20	113499	5-9
scaffoldPCE_Avium_Chro3	4321077	4321176	gap	100	5-9
scaffoldPCE_Avium_Chro3	4321177	5412103	contigPCE_Avium_Chro3_21	1090927	5-9
scaffoldPCE_Avium_Chro3	5412104	5412203	gap	100	5-9
scaffoldPCE_Avium_Chro3	5412204	5466218	contigPCE_Avium_Chro3_22	54015	5-9
scaffoldPCE_Avium_Chro3	5466219	5466318	gap	100	5-9
scaffoldPCE_Avium_Chro3	5466319	5492082	contigPCE_Avium_Chro3_23	25764	5-9
scaffoldPCE_Avium_Chro3	5492083	5492182	gap	100	5-9
scaffoldPCE_Avium_Chro3	5492183	5696426	contigPCE_Avium_Chro3_24	204244	5-9
scaffoldPCE_Avium_Chro4	20918393	22059436	contigPCE_Avium_Chro4_79	1141044	10
scaffoldPCE_Avium_Chro4	25335793	25523798	contigPCE_Avium_Chro4_gap	188006	11
scaffoldPCE_Avium_Chro4	25523799	25523898	gap	100	11
scaffoldPCE_Avium_Chro4	25523899	25866369	contigPCE_Avium_Chro4_101	342471	11
scaffoldPCE_Avium_Chro5	9945779	10775179	contigPCE_Avium_Chro5_38	829401	12
scaffoldPCE_Avium_Chro5	18357842	19234756	contigPCE_Avium_Chro5_64	876915	13, 14
scaffoldPCE_Avium_Chro6	4598357	5925215	contigPCE_Avium_Chro6_20	1326859	15, 16
scaffoldPCE_Avium_Chro6	34158063	34957629	contigPCE_Avium_Chro6_112	799567	17
scaffoldPCE_Avium_Chro7	26478113	27108297	contigPCE_Avium_Chro7_95	630185	18
scaffoldPCE_Avium_Chro7	29891520	30330800	contigPCE_Avium_Chro7_109	439281	19
scaffoldPCE_Avium_Chro7	31180266	31537404	contigPCE_Avium_Chro7_114	357139	20
scaffoldPCE_Avium_Chro8	20274625	21418235	contigPCE_Avium_Chro8_73	1143611	21
scaffoldPCE_Fruticosa_Chro2	5078866	5524070	contigPCE_Fruticosa_Chro2_16	445205	22
scaffoldPCE_Fruticosa_Chro2	9816533	11659791	contigPCE_Fruticosa_Chro2_31	1843259	23-31
scaffoldPCE_Fruticosa_Chro2	11659792	11659891	gap	100	23-31
scaffoldPCE_Fruticosa_Chro2	11659892	11995811	contigPCE_Fruticosa_Chro2_32	335920	23-31
scaffoldPCE_Fruticosa_Chro2	11995812	11995911	gap	100	23-31
scaffoldPCE_Fruticosa_Chro2	11995912	12179440	contigPCE_Fruticosa_Chro2_33	183529	23-31
scaffoldPCE_Fruticosa_Chro2	12179441	12179540	gap	100	23-31
scaffoldPCE_Fruticosa_Chro2	12179541	12550206	contigPCE_Fruticosa_Chro2_34	370666	23-31
scaffoldPCE_Fruticosa_Chro2	12550207	12550306	gap	100	23-31
scaffoldPCE_Fruticosa_Chro2	12550307	12675639	contigPCE_Fruticosa_Chro2_35	125333	23-31
scaffoldPCE_Fruticosa_Chro2	12675640	12675739	gap	100	23-31
scaffoldPCE_Fruticosa_Chro2	12675740	14396347	contigPCE_Fruticosa_Chro2_36	1720608	23-31
scaffoldPCE_Fruticosa_Chro2	24548743	24724224	contigPCE_Fruticosa_Chro2_61	175482	32
scaffoldPCE_Fruticosa_Chro4	5416048	5509463	contigPCE_Fruticosa_Chro4_17	93416	33
scaffoldPCE_Fruticosa_Chro4	5509464	5509563	gap	100	33
scaffoldPCE_Fruticosa_Chro4	5509564	5669997	contigPCE_Fruticosa_Chro4_18	160434	33
scaffoldPCE_Fruticosa_Chro4	5669998	5670097	gap	100	33
scaffoldPCE_Fruticosa_Chro4	5670098	5838457	contigPCE_Fruticosa_Chro4_19	168360	33
scaffoldPCE_Fruticosa_Chro4	10434785	10858590	contigPCE_Fruticosa_Chro4_34	423806	34-41
scaffoldPCE_Fruticosa_Chro4	10858591	10858690	gap	100	34-41
scaffoldPCE_Fruticosa_Chro4	10858691	10995376	contigPCE_Fruticosa_Chro4_35	136686	34-41
scaffoldPCE_Fruticosa_Chro4	10995377	10995476	gap	100	34-41
scaffoldPCE_Fruticosa_Chro4	10995477	11125314	contigPCE_Fruticosa_Chro4_36	129838	34-41
scaffoldPCE_Fruticosa_Chro4	11125315	11125414	gap	100	34-41
scaffoldPCE_Fruticosa_Chro4	11125415	11288028	contigPCE_Fruticosa_Chro4_37	162614	34-41
scaffoldPCE_Fruticosa_Chro4	11288029	11288128	gap	100	34-41
scaffoldPCE_Fruticosa_Chro4	11288129	11448698	contigPCE_Fruticosa_Chro4_38	160570	34-41
scaffoldPCE_Fruticosa_Chro4	11448699	11448798	gap	100	34-41
scaffoldPCE_Fruticosa_Chro4	11448799	11715841	contigPCE_Fruticosa_Chro4_39	267043	34-41
scaffoldPCE_Fruticosa_Chro4	11715842	11715941	gap	100	34-41
scaffoldPCE_Fruticosa_Chro4	11715942	11863755	contigPCE_Fruticosa_Chro4_40	147814	34-41
scaffoldPCE_Fruticosa_Chro4	11863756	11863855	gap	100	34-41
scaffoldPCE_Fruticosa_Chro4	11863856	11965047	contigPCE_Fruticosa_Chro4_41	101192	34-41
scaffoldPCE_Fruticosa_Chro4	11965048	11965147	gap	100	34-41
scaffoldPCE_Fruticosa_Chro4	11965148	12295541	contigPCE_Fruticosa_Chro4_42	330394	34-41
scaffoldPCE_Fruticosa_Chro4	12295542	12295641	gap	100	34-41
scaffoldPCE_Fruticosa_Chro4	12295642	12390032	contigPCE_Fruticosa_Chro4_43	94391	34-41
scaffoldPCE_Fruticosa_Chro4	12390033	12390132	gap	100	34-41
scaffoldPCE_Fruticosa_Chro4	12390133	12433504	contigPCE_Fruticosa_Chro4_44	43372	34-41
scaffoldPCE_Fruticosa_Chro4	12433505	12433604	gap	100	34-41
scaffoldPCE_Fruticosa_Chro4	12433605	12706182	contigPCE_Fruticosa_Chro4_45	272578	34-41
scaffoldPCE_Fruticosa_Chro4	16154429	16728851	contigPCE_Fruticosa_Chro4_55	574423	42,43
scaffoldPCE_Fruticosa_Chro4	16728852	16728951	gap	100	42,43
scaffoldPCE_Fruticosa_Chro4	16728952	16772622	contigPCE_Fruticosa_Chro4_56	43671	42,43
scaffoldPCE_Fruticosa_Chro4	16772623	16772722	gap	100	42,43
scaffoldPCE_Fruticosa_Chro4	16772723	16963113	contigPCE_Fruticosa_Chro4_57	190391	42,43
scaffoldPCE_Fruticosa_Chro4	16963114	16963213	gap	100	42,43
scaffoldPCE_Fruticosa_Chro4	16963214	17050711	contigPCE_Fruticosa_Chro4_58	87498	42,43
scaffoldPCE_Fruticosa_Chro5	5431176	5938821	contigPCE_Fruticosa_Chro5_6	507646	44,45
scaffoldPCE_Fruticosa_Chro5	5938822	5938921	gap	100	44,45
scaffoldPCE_Fruticosa_Chro5	5938922	6097469	contigPCE_Fruticosa_Chro5_7	158548	44,45
scaffoldPCE_Fruticosa_Chro7	26174400	26306352	contigPCE_Fruticosa_Chro7_70	131953	46
scaffoldPCE_Fruticosa_Chro7	33660804	33828828	contigPCE_Fruticosa_Chro7_85	168025	47
scaffoldPCE_Fruticosa_Chro7	33828829	33828928	gap	100	47
scaffoldPCE_Fruticosa_Chro7	33828929	33941749	contigPCE_Fruticosa_Chro7_86	112821	47
scaffoldPCE_Fruticosa_Chro7	33941750	33941849	gap	100	47
scaffoldPCE_Fruticosa_Chro7	33941850	34061839	contigPCE_Fruticosa_Chro7_87	119990	47
scaffoldPCE_Fruticosa_Chro7	37171870	37357001	contigPCE_Fruticosa_Chro7_103	185132	48
scaffoldPCE_Fruticosa_Chro7	37357002	37357101	gap	100	48
scaffoldPCE_Fruticosa_Chro7	37357102	37505782	contigPCE_Fruticosa_Chro7_104	148681	48
scaffoldPCE_Fruticosa_Chro7	39022731	39150497	contigPCE_Fruticosa_Chro7_116	127767	49
scaffoldPCE_Fruticosa_Chro7	39150498	39150597	gap	100	49
scaffoldPCE_Fruticosa_Chro7	39150598	39243982	contigPCE_Fruticosa_Chro7_117	93385	49
scaffoldPCE_Fruticosa_Chro7	39243983	39244082	gap	100	49
scaffoldPCE_Fruticosa_Chro7	39244083	39378587	contigPCE_Fruticosa_Chro7_118	134505	49
scaffoldPCE_Fruticosa_Chro7	40728399	40837981	contigPCE_Fruticosa_Chro7_127	109583	50
scaffoldPCE_Fruticosa_Chro7	40837982	40838081	gap	100	50
scaffoldPCE_Fruticosa_Chro7	40838082	40964277	contigPCE_Fruticosa_Chro7_128	126196	50
scaffoldPCE_Fruticosa_Chro7	40964278	40964377	gap	100	50
scaffoldPCE_Fruticosa_Chro7	40964378	41090175	contigPCE_Fruticosa_Chro7_129	125798	50

## Sheet: Tabelle2
Chromosome	start region	end region	HE No.
scaffoldPCE_Avium_Chro01	500000	750000	1
scaffoldPCE_Avium_Chro01	17250000	17500000	2
scaffoldPCE_Avium_Chro01	21750000	22000000	3
scaffoldPCE_Avium_Chro02	18500000	18750000	4
scaffoldPCE_Avium_Chro03	4250000	4500000	5
scaffoldPCE_Avium_Chro03	4500000	4750000	6
scaffoldPCE_Avium_Chro03	4750000	5000000	7
scaffoldPCE_Avium_Chro03	5000000	5250000	8
scaffoldPCE_Avium_Chro03	5250000	5500000	9
scaffoldPCE_Avium_Chro04	21000000	21250000	10
scaffoldPCE_Avium_Chro04	25500000	25750000	11
scaffoldPCE_Avium_Chro05	10500000	10750000	12
scaffoldPCE_Avium_Chro05	18500000	18750000	13
scaffoldPCE_Avium_Chro05	18750000	19000000	14
scaffoldPCE_Avium_Chro06	5000000	5250000	15
scaffoldPCE_Avium_Chro06	5500000	5750000	16
scaffoldPCE_Avium_Chro06	34500000	34750000	17
scaffoldPCE_Avium_Chro07	26500000	26750000	18
scaffoldPCE_Avium_Chro07	30000000	30250000	19
scaffoldPCE_Avium_Chro07	31500000	31750000	20
scaffoldPCE_Avium_Chro08	20750000	21000000	21
scaffoldPCE_Fruticosa_Chro02	5000000	5250000	22
scaffoldPCE_Fruticosa_Chro02	11250000	11500000	23
scaffoldPCE_Fruticosa_Chro02	11500000	11750000	24
scaffoldPCE_Fruticosa_Chro02	11750000	12000000	25
scaffoldPCE_Fruticosa_Chro02	12000000	12250000	26
scaffoldPCE_Fruticosa_Chro02	12250000	12500000	27
scaffoldPCE_Fruticosa_Chro02	12500000	12750000	28
scaffoldPCE_Fruticosa_Chro02	12750000	13000000	29
scaffoldPCE_Fruticosa_Chro02	13000000	13250000	30
scaffoldPCE_Fruticosa_Chro02	13250000	13500000	31
scaffoldPCE_Fruticosa_Chro02	24500000	24750000	32
scaffoldPCE_Fruticosa_Chro04	5500000	5750000	33
scaffoldPCE_Fruticosa_Chro04	10750000	11000000	34
scaffoldPCE_Fruticosa_Chro04	11000000	11250000	35
scaffoldPCE_Fruticosa_Chro04	11250000	11500000	36
scaffoldPCE_Fruticosa_Chro04	11500000	11750000	37
scaffoldPCE_Fruticosa_Chro04	11750000	12000000	38
scaffoldPCE_Fruticosa_Chro04	12000000	12250000	39
scaffoldPCE_Fruticosa_Chro04	12000000	12250000	40
scaffoldPCE_Fruticosa_Chro04	12250000	12500000	41
scaffoldPCE_Fruticosa_Chro04	16500000	16750000	42
scaffoldPCE_Fruticosa_Chro04	16750000	17000000	43
scaffoldPCE_Fruticosa_Chro05	5500000	5750000	44
scaffoldPCE_Fruticosa_Chro05	5750000	6000000	45
scaffoldPCE_Fruticosa_Chro07	26250000	26500000	46
scaffoldPCE_Fruticosa_Chro07	33750000	34000000	47
scaffoldPCE_Fruticosa_Chro07	37250000	37500000	48
scaffoldPCE_Fruticosa_Chro07	39000000	39250000	49
scaffoldPCE_Fruticosa_Chro07	40750000	41000000	50
